# Supplementary material for: The Subjective Sensation of Synchrony: An Experimental Study
Source: PLoS One. 2016 Feb 12;11(2):e0147008. doi: 10.1371/journal.pone.0147008 (PMC4752214; doi:10.1371/journal.pone.0147008)
Supplement: S1 Dataset — (XLSX) [file pone.0147008.s002.xlsx]

## Sheet: number of trial repetitions
coupleID	Task 1	Task 2	Task 3	Task 4	Task 5	Task 6
S001-S002	1	1	1	1	3	1
S003-S004	3	1	1	1	3	1
S005-S006	1	3	1	1	1	1
S007-S008	4	1	1	1	3	2
S009-S010	1	3	3	1	1	1
S011-S012	3	1	1	1	3	1
S013-S014	3	3	1	1	4	1
S015-S016	4	3	1	1	3	1
S057-S058	3	1	1	1	1	1
S059-S060	1	1	3	1	1	3

## Sheet: subjective_synchrony
coupleID	subjectID	group	protocolNumber	gender	taskNumber	hand distance	hand speed difference	empathy	PANAS POS	PANAS NEG	Synchrony feeling	Synchrony Onset	Time	coupleID2	subjectID2	gender2	timecat	taskcat
S001-S002	S001	control	1	m	1	62.0886	0.290442	67	24	10	0	0	5	1	1	2	10	1
S001-S002	S001	control	1	m	1	135.691	0.168065	67	24	10	0	0	6	1	1	2	10	1
S001-S002	S001	control	1	m	1	114.751	0.329746	67	24	10	0	0	7	1	1	2	10	1
S001-S002	S001	control	1	m	1	185.533	0.261138	67	24	10	0	0	8	1	1	2	10	1
S001-S002	S001	control	1	m	1	141.637	0.214827	67	24	10	0	0	9	1	1	2	10	1
S001-S002	S001	control	1	m	1	117.18	0.184101	67	24	10	0	0	10	1	1	2	10	1
S001-S002	S001	control	1	m	1	133.289	0.227914	67	24	10	0	0	11	1	1	2	20	1
S001-S002	S001	control	1	m	1	115.712	0.109633	67	24	10	0	0	12	1	1	2	20	1
S001-S002	S001	control	1	m	1	122.604	0.165051	67	24	10	0	0	13	1	1	2	20	1
S001-S002	S001	control	1	m	1	104.234	0.181569	67	24	10	0	0	14	1	1	2	20	1
S001-S002	S001	control	1	m	1	94.3103	0.153259	67	24	10	0	0	15	1	1	2	20	1
S001-S002	S001	control	1	m	1	137.182	0.194239	67	24	10	0	0	16	1	1	2	20	1
S001-S002	S001	control	1	m	1	119.162	0.205109	67	24	10	0	0	17	1	1	2	20	1
S001-S002	S001	control	1	m	1	102.426	0.217466	67	24	10	0	0	18	1	1	2	20	1
S001-S002	S001	control	1	m	1	84.6876	0.193828	67	24	10	0	0	19	1	1	2	20	1
S001-S002	S001	control	1	m	1	126.917	0.141753	67	24	10	0	0	20	1	1	2	20	1
S001-S002	S001	control	1	m	1	123.918	0.181762	67	24	10	0	0	21	1	1	2	30	1
S001-S002	S001	control	1	m	1	81.7257	0.156077	67	24	10	0	0	22	1	1	2	30	1
S001-S002	S001	control	1	m	1	63.1458	0.145793	67	24	10	0	0	23	1	1	2	30	1
S001-S002	S001	control	1	m	1	85.2643	0.0811865	67	24	10	0	0	24	1	1	2	30	1
S001-S002	S001	control	1	m	1	108.184	0.177691	67	24	10	0	0	25	1	1	2	30	1
S001-S002	S001	control	1	m	1	95.9836	0.171483	67	24	10	1	1	26	1	1	2	30	1
S001-S002	S001	control	1	m	1	56.2852	0.143155	67	24	10	1	0	27	1	1	2	30	1
S001-S002	S001	control	1	m	1	75.9105	0.129889	67	24	10	1	0	28	1	1	2	30	1
S001-S002	S001	control	1	m	1	80.9258	0.202173	67	24	10	1	0	29	1	1	2	30	1
S001-S002	S001	control	1	m	1	65.5343	0.135868	67	24	10	1	0	30	1	1	2	30	1
S001-S002	S001	control	1	m	1	51.5191	0.13054	67	24	10	1	0	31	1	1	2	40	1
S001-S002	S001	control	1	m	1	63.234	0.142757	67	24	10	1	0	32	1	1	2	40	1
S001-S002	S001	control	1	m	1	94.4058	0.182179	67	24	10	1	0	33	1	1	2	40	1
S001-S002	S001	control	1	m	1	46.6886	0.152027	67	24	10	1	0	34	1	1	2	40	1
S001-S002	S001	control	1	m	1	64.0824	0.151379	67	24	10	1	0	35	1	1	2	40	1
S001-S002	S001	control	1	m	1	92.9881	0.215981	67	24	10	1	0	36	1	1	2	40	1
S001-S002	S001	control	1	m	1	115.352	0.181057	67	24	10	1	0	37	1	1	2	40	1
S001-S002	S001	control	1	m	1	59.7616	0.167133	67	24	10	1	0	38	1	1	2	40	1
S001-S002	S001	control	1	m	1	67.5078	0.147836	67	24	10	1	0	39	1	1	2	40	1
S001-S002	S001	control	1	m	1	58.9043	0.161832	67	24	10	1	0	40	1	1	2	40	1
S001-S002	S001	control	1	m	1	83.8458	0.147622	67	24	10	1	0	41	1	1	2	50	1
S001-S002	S001	control	1	m	1	81.2248	0.178838	67	24	10	1	0	42	1	1	2	50	1
S001-S002	S001	control	1	m	1	95.6798	0.203233	67	24	10	1	0	43	1	1	2	50	1
S001-S002	S001	control	1	m	1	131.419	0.256892	67	24	10	1	0	44	1	1	2	50	1
S001-S002	S001	control	1	m	1	81.5359	0.210376	67	24	10	1	0	45	1	1	2	50	1
S001-S002	S001	control	1	m	1	71.6284	0.154813	67	24	10	1	0	46	1	1	2	50	1
S001-S002	S001	control	1	m	1	90.1524	0.211734	67	24	10	1	0	47	1	1	2	50	1
S001-S002	S001	control	1	m	1	88.5018	0.178717	67	24	10	1	0	48	1	1	2	50	1
S001-S002	S001	control	1	m	1	66.4788	0.205865	67	24	10	1	0	49	1	1	2	50	1
S001-S002	S001	control	1	m	1	78.5621	0.138476	67	24	10	1	0	50	1	1	2	50	1
S001-S002	S001	control	1	m	1	108.342	0.232486	67	24	10	1	0	51	1	1	2	60	1
S001-S002	S001	control	1	m	1	114.313	0.150728	67	24	10	1	0	52	1	1	2	60	1
S001-S002	S001	control	1	m	1	130.016	0.246624	67	24	10	1	0	53	1	1	2	60	1
S001-S002	S001	control	1	m	1	101.773	0.156497	67	24	10	1	0	54	1	1	2	60	1
S001-S002	S001	control	1	m	1	115.209	0.100925	67	24	10	1	0	55	1	1	2	60	1
S001-S002	S001	control	1	m	1	83.6922	0.178387	67	24	10	1	0	56	1	1	2	60	1
S001-S002	S001	control	1	m	1	96.967	0.144972	67	24	10	1	0	57	1	1	2	60	1
S001-S002	S001	control	1	m	1	49.3132	0.15214	67	24	10	1	0	58	1	1	2	60	1
S001-S002	S001	control	1	m	1	81.3522	0.0934287	67	24	10	1	0	59	1	1	2	60	1
S001-S002	S001	control	1	m	2	175.301	0.432213	67	24	10	0	0	5	1	1	2	10	2
S001-S002	S001	control	1	m	2	179.048	0.526696	67	24	10	0	0	6	1	1	2	10	2
S001-S002	S001	control	1	m	2	145.461	0.279161	67	24	10	0	0	7	1	1	2	10	2
S001-S002	S001	control	1	m	2	156.928	0.3372	67	24	10	0	0	8	1	1	2	10	2
S001-S002	S001	control	1	m	2	222.284	0.645939	67	24	10	0	0	9	1	1	2	10	2
S001-S002	S001	control	1	m	2	230.902	0.631843	67	24	10	0	0	10	1	1	2	10	2
S001-S002	S001	control	1	m	2	215.43	0.490054	67	24	10	0	0	11	1	1	2	20	2
S001-S002	S001	control	1	m	2	155.97	0.367069	67	24	10	0	0	12	1	1	2	20	2
S001-S002	S001	control	1	m	2	119.338	0.25186	67	24	10	0	0	13	1	1	2	20	2
S001-S002	S001	control	1	m	2	136.359	0.214275	67	24	10	0	0	14	1	1	2	20	2
S001-S002	S001	control	1	m	2	148.474	0.340177	67	24	10	0	0	15	1	1	2	20	2
S001-S002	S001	control	1	m	2	158.923	0.375738	67	24	10	0	0	16	1	1	2	20	2
S001-S002	S001	control	1	m	2	135.09	0.360245	67	24	10	0	0	17	1	1	2	20	2
S001-S002	S001	control	1	m	2	130.108	0.269063	67	24	10	0	0	18	1	1	2	20	2
S001-S002	S001	control	1	m	2	191.722	0.472012	67	24	10	0	0	19	1	1	2	20	2
S001-S002	S001	control	1	m	2	180.012	0.509061	67	24	10	0	0	20	1	1	2	20	2
S001-S002	S001	control	1	m	2	130.364	0.264108	67	24	10	0	0	21	1	1	2	30	2
S001-S002	S001	control	1	m	2	136.863	0.278407	67	24	10	0	0	22	1	1	2	30	2
S001-S002	S001	control	1	m	2	141.224	0.373194	67	24	10	0	0	23	1	1	2	30	2
S001-S002	S001	control	1	m	2	179.988	0.435028	67	24	10	0	0	24	1	1	2	30	2
S001-S002	S001	control	1	m	2	155.87	0.401237	67	24	10	0	0	25	1	1	2	30	2
S001-S002	S001	control	1	m	2	143.137	0.311921	67	24	10	0	0	26	1	1	2	30	2
S001-S002	S001	control	1	m	2	148.776	0.243349	67	24	10	0	0	27	1	1	2	30	2
S001-S002	S001	control	1	m	2	82.6519	0.204766	67	24	10	0	0	28	1	1	2	30	2
S001-S002	S001	control	1	m	2	130.43	0.256307	67	24	10	0	0	29	1	1	2	30	2
S001-S002	S001	control	1	m	2	166.402	0.367809	67	24	10	0	0	30	1	1	2	30	2
S001-S002	S001	control	1	m	2	140.603	0.323333	67	24	10	0	0	31	1	1	2	40	2
S001-S002	S001	control	1	m	2	128.118	0.275418	67	24	10	0	0	32	1	1	2	40	2
S001-S002	S001	control	1	m	2	151.64	0.298816	67	24	10	0	0	33	1	1	2	40	2
S001-S002	S001	control	1	m	2	138.157	0.176564	67	24	10	0	0	34	1	1	2	40	2
S001-S002	S001	control	1	m	2	130.401	0.174617	67	24	10	0	0	35	1	1	2	40	2
S001-S002	S001	control	1	m	2	151.822	0.254387	67	24	10	0	0	36	1	1	2	40	2
S001-S002	S001	control	1	m	2	154.968	0.402559	67	24	10	0	0	37	1	1	2	40	2
S001-S002	S001	control	1	m	2	205.713	0.495283	67	24	10	0	0	38	1	1	2	40	2
S001-S002	S001	control	1	m	2	167.051	0.464199	67	24	10	0	0	39	1	1	2	40	2
S001-S002	S001	control	1	m	2	146.485	0.292377	67	24	10	0	0	40	1	1	2	40	2
S001-S002	S001	control	1	m	2	86.4917	0.238246	67	24	10	0	0	41	1	1	2	50	2
S001-S002	S001	control	1	m	2	147.506	0.274207	67	24	10	0	0	42	1	1	2	50	2
S001-S002	S001	control	1	m	2	149.995	0.347258	67	24	10	0	0	43	1	1	2	50	2
S001-S002	S001	control	1	m	2	159.067	0.465493	67	24	10	0	0	44	1	1	2	50	2
S001-S002	S001	control	1	m	2	151.123	0.377016	67	24	10	0	0	45	1	1	2	50	2
S001-S002	S001	control	1	m	2	158.867	0.295485	67	24	10	0	0	46	1	1	2	50	2
S001-S002	S001	control	1	m	2	99.3111	0.158619	67	24	10	0	0	47	1	1	2	50	2
S001-S002	S001	control	1	m	2	89.1146	0.163097	67	24	10	0	0	48	1	1	2	50	2
S001-S002	S001	control	1	m	2	116.469	0.171476	67	24	10	0	0	49	1	1	2	50	2
S001-S002	S001	control	1	m	2	122.037	0.222667	67	24	10	0	0	50	1	1	2	50	2
S001-S002	S001	control	1	m	2	99.6507	0.190595	67	24	10	0	0	51	1	1	2	60	2
S001-S002	S001	control	1	m	2	102.777	0.215141	67	24	10	0	0	52	1	1	2	60	2
S001-S002	S001	control	1	m	2	152.641	0.293016	67	24	10	0	0	53	1	1	2	60	2
S001-S002	S001	control	1	m	2	130.29	0.320805	67	24	10	1	1	54	1	1	2	60	2
S001-S002	S001	control	1	m	2	133.503	0.204012	67	24	10	1	0	55	1	1	2	60	2
S001-S002	S001	control	1	m	2	124.998	0.182586	67	24	10	1	0	56	1	1	2	60	2
S001-S002	S001	control	1	m	2	94.0965	0.172272	67	24	10	1	0	57	1	1	2	60	2
S001-S002	S001	control	1	m	2	127.563	0.218237	67	24	10	1	0	58	1	1	2	60	2
S001-S002	S001	control	1	m	2	106.734	0.137511	67	24	10	1	0	59	1	1	2	60	2
S001-S002	S001	control	1	m	3	110.449	0.139774	67	24	10	0	0	5	1	1	2	10	3
S001-S002	S001	control	1	m	3	150.076	0.349066	67	24	10	0	0	6	1	1	2	10	3
S001-S002	S001	control	1	m	3	136.66	0.284277	67	24	10	0	0	7	1	1	2	10	3
S001-S002	S001	control	1	m	3	108.358	0.276026	67	24	10	0	0	8	1	1	2	10	3
S001-S002	S001	control	1	m	3	106.236	0.190428	67	24	10	0	0	9	1	1	2	10	3
S001-S002	S001	control	1	m	3	111.066	0.215297	67	24	10	0	0	10	1	1	2	10	3
S001-S002	S001	control	1	m	3	108.36	0.233832	67	24	10	0	0	11	1	1	2	20	3
S001-S002	S001	control	1	m	3	80.9415	0.146142	67	24	10	0	0	12	1	1	2	20	3
S001-S002	S001	control	1	m	3	97.1087	0.177033	67	24	10	0	0	13	1	1	2	20	3
S001-S002	S001	control	1	m	3	98.5648	0.220009	67	24	10	0	0	14	1	1	2	20	3
S001-S002	S001	control	1	m	3	121.767	0.187635	67	24	10	0	0	15	1	1	2	20	3
S001-S002	S001	control	1	m	3	113.104	0.200212	67	24	10	1	1	16	1	1	2	20	3
S001-S002	S001	control	1	m	3	112.674	0.177653	67	24	10	1	0	17	1	1	2	20	3
S001-S002	S001	control	1	m	3	82.1109	0.186958	67	24	10	1	0	18	1	1	2	20	3
S001-S002	S001	control	1	m	3	111.518	0.164723	67	24	10	1	0	19	1	1	2	20	3
S001-S002	S001	control	1	m	3	115.333	0.233209	67	24	10	1	0	20	1	1	2	20	3
S001-S002	S001	control	1	m	3	134.742	0.232633	67	24	10	1	0	21	1	1	2	30	3
S001-S002	S001	control	1	m	3	131.976	0.239375	67	24	10	1	0	22	1	1	2	30	3
S001-S002	S001	control	1	m	3	125.004	0.187108	67	24	10	1	0	23	1	1	2	30	3
S001-S002	S001	control	1	m	3	132.448	0.242103	67	24	10	1	0	24	1	1	2	30	3
S001-S002	S001	control	1	m	3	112.056	0.174919	67	24	10	1	0	25	1	1	2	30	3
S001-S002	S001	control	1	m	3	123.524	0.171671	67	24	10	1	0	26	1	1	2	30	3
S001-S002	S001	control	1	m	3	97.011	0.197466	67	24	10	1	0	27	1	1	2	30	3
S001-S002	S001	control	1	m	3	93.368	0.149552	67	24	10	1	0	28	1	1	2	30	3
S001-S002	S001	control	1	m	3	86.5689	0.139575	67	24	10	1	0	29	1	1	2	30	3
S001-S002	S001	control	1	m	3	84.8211	0.114912	67	24	10	1	0	30	1	1	2	30	3
S001-S002	S001	control	1	m	3	91.354	0.133156	67	24	10	1	0	31	1	1	2	40	3
S001-S002	S001	control	1	m	3	93.9839	0.210402	67	24	10	1	0	32	1	1	2	40	3
S001-S002	S001	control	1	m	3	104.138	0.185603	67	24	10	1	0	33	1	1	2	40	3
S001-S002	S001	control	1	m	3	115.267	0.214778	67	24	10	1	0	34	1	1	2	40	3
S001-S002	S001	control	1	m	3	106.93	0.22809	67	24	10	1	0	35	1	1	2	40	3
S001-S002	S001	control	1	m	3	114.427	0.189232	67	24	10	1	0	36	1	1	2	40	3
S001-S002	S001	control	1	m	3	108.74	0.218735	67	24	10	1	0	37	1	1	2	40	3
S001-S002	S001	control	1	m	3	100.947	0.15211	67	24	10	1	0	38	1	1	2	40	3
S001-S002	S001	control	1	m	3	111.731	0.199428	67	24	10	1	0	39	1	1	2	40	3
S001-S002	S001	control	1	m	3	128.728	0.18974	67	24	10	1	0	40	1	1	2	40	3
S001-S002	S001	control	1	m	3	124.173	0.196148	67	24	10	1	0	41	1	1	2	50	3
S001-S002	S001	control	1	m	3	121.373	0.191518	67	24	10	1	0	42	1	1	2	50	3
S001-S002	S001	control	1	m	3	68.3405	0.117759	67	24	10	1	0	43	1	1	2	50	3
S001-S002	S001	control	1	m	3	69.1526	0.109002	67	24	10	1	0	44	1	1	2	50	3
S001-S002	S001	control	1	m	3	70.8729	0.123633	67	24	10	1	0	45	1	1	2	50	3
S001-S002	S001	control	1	m	3	83.8838	0.167533	67	24	10	1	0	46	1	1	2	50	3
S001-S002	S001	control	1	m	3	99.0561	0.136759	67	24	10	1	0	47	1	1	2	50	3
S001-S002	S001	control	1	m	3	85.8618	0.143618	67	24	10	1	0	48	1	1	2	50	3
S001-S002	S001	control	1	m	3	94.0903	0.165255	67	24	10	1	0	49	1	1	2	50	3
S001-S002	S001	control	1	m	3	88.0976	0.150272	67	24	10	1	0	50	1	1	2	50	3
S001-S002	S001	control	1	m	3	116.549	0.14445	67	24	10	1	0	51	1	1	2	60	3
S001-S002	S001	control	1	m	3	94.5169	0.177783	67	24	10	1	0	52	1	1	2	60	3
S001-S002	S001	control	1	m	3	112.611	0.210393	67	24	10	1	0	53	1	1	2	60	3
S001-S002	S001	control	1	m	3	82.1833	0.137125	67	24	10	1	0	54	1	1	2	60	3
S001-S002	S001	control	1	m	3	138.271	0.226206	67	24	10	1	0	55	1	1	2	60	3
S001-S002	S001	control	1	m	3	132.267	0.260536	67	24	10	1	0	56	1	1	2	60	3
S001-S002	S001	control	1	m	3	151.742	0.220769	67	24	10	1	0	57	1	1	2	60	3
S001-S002	S001	control	1	m	3	144.477	0.257228	67	24	10	1	0	58	1	1	2	60	3
S001-S002	S001	control	1	m	3	132.042	0.2311	67	24	10	1	0	59	1	1	2	60	3
S001-S002	S001	control	1	m	4	238.859	0.412895	67	24	10	0	0	5	1	1	2	10	4
S001-S002	S001	control	1	m	4	194.85	0.33112	67	24	10	0	0	6	1	1	2	10	4
S001-S002	S001	control	1	m	4	223.687	0.409068	67	24	10	0	0	7	1	1	2	10	4
S001-S002	S001	control	1	m	4	177.75	0.396164	67	24	10	0	0	8	1	1	2	10	4
S001-S002	S001	control	1	m	4	194.557	0.355203	67	24	10	0	0	9	1	1	2	10	4
S001-S002	S001	control	1	m	4	133.423	0.317455	67	24	10	0	0	10	1	1	2	10	4
S001-S002	S001	control	1	m	4	157.224	0.15941	67	24	10	0	0	11	1	1	2	20	4
S001-S002	S001	control	1	m	4	167.688	0.2214	67	24	10	0	0	12	1	1	2	20	4
S001-S002	S001	control	1	m	4	160.997	0.254517	67	24	10	0	0	13	1	1	2	20	4
S001-S002	S001	control	1	m	4	166.338	0.171107	67	24	10	0	0	14	1	1	2	20	4
S001-S002	S001	control	1	m	4	155.963	0.15626	67	24	10	0	0	15	1	1	2	20	4
S001-S002	S001	control	1	m	4	155.451	0.139417	67	24	10	0	0	16	1	1	2	20	4
S001-S002	S001	control	1	m	4	152.791	0.20835	67	24	10	1	1	17	1	1	2	20	4
S001-S002	S001	control	1	m	4	147.342	0.128635	67	24	10	1	0	18	1	1	2	20	4
S001-S002	S001	control	1	m	4	147.785	0.129866	67	24	10	1	0	19	1	1	2	20	4
S001-S002	S001	control	1	m	4	140.542	0.146854	67	24	10	1	0	20	1	1	2	20	4
S001-S002	S001	control	1	m	4	149.472	0.185949	67	24	10	1	0	21	1	1	2	30	4
S001-S002	S001	control	1	m	4	142.888	0.135833	67	24	10	1	0	22	1	1	2	30	4
S001-S002	S001	control	1	m	4	141.87	0.168944	67	24	10	1	0	23	1	1	2	30	4
S001-S002	S001	control	1	m	4	123.057	0.19916	67	24	10	1	0	24	1	1	2	30	4
S001-S002	S001	control	1	m	4	161.204	0.163857	67	24	10	1	0	25	1	1	2	30	4
S001-S002	S001	control	1	m	4	154.93	0.197246	67	24	10	1	0	26	1	1	2	30	4
S001-S002	S001	control	1	m	4	167.846	0.20949	67	24	10	1	0	27	1	1	2	30	4
S001-S002	S001	control	1	m	4	149.388	0.293555	67	24	10	1	0	28	1	1	2	30	4
S001-S002	S001	control	1	m	4	176.48	0.175001	67	24	10	1	0	29	1	1	2	30	4
S001-S002	S001	control	1	m	4	159.269	0.110404	67	24	10	1	0	30	1	1	2	30	4
S001-S002	S001	control	1	m	4	157.32	0.163735	67	24	10	1	0	31	1	1	2	40	4
S001-S002	S001	control	1	m	4	141.712	0.114598	67	24	10	1	0	32	1	1	2	40	4
S001-S002	S001	control	1	m	4	132.389	0.139085	67	24	10	1	0	33	1	1	2	40	4
S001-S002	S001	control	1	m	4	146.362	0.124663	67	24	10	1	0	34	1	1	2	40	4
S001-S002	S001	control	1	m	4	131.501	0.131543	67	24	10	1	0	35	1	1	2	40	4
S001-S002	S001	control	1	m	4	131.211	0.128449	67	24	10	1	0	36	1	1	2	40	4
S001-S002	S001	control	1	m	4	128.741	0.116461	67	24	10	1	0	37	1	1	2	40	4
S001-S002	S001	control	1	m	4	141.843	0.132384	67	24	10	1	0	38	1	1	2	40	4
S001-S002	S001	control	1	m	4	152.137	0.1032	67	24	10	1	0	39	1	1	2	40	4
S001-S002	S001	control	1	m	4	140.141	0.153689	67	24	10	1	0	40	1	1	2	40	4
S001-S002	S001	control	1	m	4	137.152	0.136774	67	24	10	1	0	41	1	1	2	50	4
S001-S002	S001	control	1	m	4	141.353	0.115436	67	24	10	1	0	42	1	1	2	50	4
S001-S002	S001	control	1	m	4	176.829	0.163756	67	24	10	1	0	43	1	1	2	50	4
S001-S002	S001	control	1	m	4	172.481	0.23075	67	24	10	1	0	44	1	1	2	50	4
S001-S002	S001	control	1	m	4	149.086	0.185726	67	24	10	1	0	45	1	1	2	50	4
S001-S002	S001	control	1	m	4	148.317	0.170527	67	24	10	1	0	46	1	1	2	50	4
S001-S002	S001	control	1	m	4	170.532	0.122175	67	24	10	1	0	47	1	1	2	50	4
S001-S002	S001	control	1	m	4	170.85	0.100949	67	24	10	1	0	48	1	1	2	50	4
S001-S002	S001	control	1	m	4	159.934	0.133062	67	24	10	1	0	49	1	1	2	50	4
S001-S002	S001	control	1	m	4	166.047	0.157871	67	24	10	1	0	50	1	1	2	50	4
S001-S002	S001	control	1	m	4	181.251	0.138018	67	24	10	1	0	51	1	1	2	60	4
S001-S002	S001	control	1	m	4	168.673	0.101595	67	24	10	1	0	52	1	1	2	60	4
S001-S002	S001	control	1	m	4	175.271	0.132032	67	24	10	1	0	53	1	1	2	60	4
S001-S002	S001	control	1	m	4	187.001	0.159524	67	24	10	1	0	54	1	1	2	60	4
S001-S002	S001	control	1	m	4	166.706	0.20599	67	24	10	1	0	55	1	1	2	60	4
S001-S002	S001	control	1	m	4	190.672	0.160186	67	24	10	1	0	56	1	1	2	60	4
S001-S002	S001	control	1	m	4	173.952	0.130027	67	24	10	1	0	57	1	1	2	60	4
S001-S002	S001	control	1	m	4	183.383	0.109679	67	24	10	1	0	58	1	1	2	60	4
S001-S002	S001	control	1	m	4	202.208	0.140171	67	24	10	1	0	59	1	1	2	60	4
S001-S002	S001	control	1	m	5	154.883	0.355562	67	24	10	0	0	5	1	1	2	10	5
S001-S002	S001	control	1	m	5	100.768	0.178714	67	24	10	0	0	6	1	1	2	10	5
S001-S002	S001	control	1	m	5	176.101	0.356426	67	24	10	0	0	7	1	1	2	10	5
S001-S002	S001	control	1	m	5	161.274	0.399124	67	24	10	0	0	8	1	1	2	10	5
S001-S002	S001	control	1	m	5	120.472	0.190855	67	24	10	0	0	9	1	1	2	10	5
S001-S002	S001	control	1	m	5	196.438	0.301529	67	24	10	0	0	10	1	1	2	10	5
S001-S002	S001	control	1	m	5	161.816	0.21908	67	24	10	1	1	11	1	1	2	20	5
S001-S002	S001	control	1	m	5	122.984	0.192085	67	24	10	1	0	12	1	1	2	20	5
S001-S002	S001	control	1	m	5	158.018	0.183342	67	24	10	1	0	13	1	1	2	20	5
S001-S002	S001	control	1	m	5	151.505	0.224005	67	24	10	1	0	14	1	1	2	20	5
S001-S002	S001	control	1	m	5	110.079	0.332598	67	24	10	1	0	15	1	1	2	20	5
S001-S002	S001	control	1	m	5	157.801	0.248348	67	24	10	1	0	16	1	1	2	20	5
S001-S002	S001	control	1	m	5	152.3	0.27693	67	24	10	1	0	17	1	1	2	20	5
S001-S002	S001	control	1	m	5	134.166	0.260695	67	24	10	1	0	18	1	1	2	20	5
S001-S002	S001	control	1	m	5	109.432	0.168782	67	24	10	1	0	19	1	1	2	20	5
S001-S002	S001	control	1	m	5	127.034	0.208035	67	24	10	1	0	20	1	1	2	20	5
S001-S002	S001	control	1	m	5	147.656	0.253132	67	24	10	1	0	21	1	1	2	30	5
S001-S002	S001	control	1	m	5	133.868	0.314614	67	24	10	1	0	22	1	1	2	30	5
S001-S002	S001	control	1	m	5	190.182	0.298704	67	24	10	1	0	23	1	1	2	30	5
S001-S002	S001	control	1	m	5	178.96	0.263675	67	24	10	1	0	24	1	1	2	30	5
S001-S002	S001	control	1	m	5	97.2434	0.168012	67	24	10	1	0	25	1	1	2	30	5
S001-S002	S001	control	1	m	5	105.182	0.168282	67	24	10	1	0	26	1	1	2	30	5
S001-S002	S001	control	1	m	5	114.443	0.118024	67	24	10	1	0	27	1	1	2	30	5
S001-S002	S001	control	1	m	5	103.639	0.148215	67	24	10	1	0	28	1	1	2	30	5
S001-S002	S001	control	1	m	5	121.326	0.290036	67	24	10	1	0	29	1	1	2	30	5
S001-S002	S001	control	1	m	5	176.223	0.282816	67	24	10	1	0	30	1	1	2	30	5
S001-S002	S001	control	1	m	5	166.226	0.323227	67	24	10	1	0	31	1	1	2	40	5
S001-S002	S001	control	1	m	5	148.117	0.233686	67	24	10	1	0	32	1	1	2	40	5
S001-S002	S001	control	1	m	5	124.532	0.169135	67	24	10	1	0	33	1	1	2	40	5
S001-S002	S001	control	1	m	5	168.027	0.169107	67	24	10	1	0	34	1	1	2	40	5
S001-S002	S001	control	1	m	5	181.308	0.253893	67	24	10	1	0	35	1	1	2	40	5
S001-S002	S001	control	1	m	5	126.573	0.241592	67	24	10	1	0	36	1	1	2	40	5
S001-S002	S001	control	1	m	5	138.427	0.180798	67	24	10	1	0	37	1	1	2	40	5
S001-S002	S001	control	1	m	5	164.319	0.242585	67	24	10	1	0	38	1	1	2	40	5
S001-S002	S001	control	1	m	5	171.003	0.21251	67	24	10	1	0	39	1	1	2	40	5
S001-S002	S001	control	1	m	5	138.985	0.289378	67	24	10	1	0	40	1	1	2	40	5
S001-S002	S001	control	1	m	5	185.073	0.22824	67	24	10	1	0	41	1	1	2	50	5
S001-S002	S001	control	1	m	5	164.017	0.217345	67	24	10	1	0	42	1	1	2	50	5
S001-S002	S001	control	1	m	5	157.53	0.167356	67	24	10	1	0	43	1	1	2	50	5
S001-S002	S001	control	1	m	5	149.662	0.154983	67	24	10	1	0	44	1	1	2	50	5
S001-S002	S001	control	1	m	5	163.839	0.217478	67	24	10	1	0	45	1	1	2	50	5
S001-S002	S001	control	1	m	5	159.852	0.141285	67	24	10	1	0	46	1	1	2	50	5
S001-S002	S001	control	1	m	5	143.088	0.241425	67	24	10	1	0	47	1	1	2	50	5
S001-S002	S001	control	1	m	5	187.869	0.232853	67	24	10	1	0	48	1	1	2	50	5
S001-S002	S001	control	1	m	5	177.566	0.205495	67	24	10	1	0	49	1	1	2	50	5
S001-S002	S001	control	1	m	5	129.811	0.219907	67	24	10	1	0	50	1	1	2	50	5
S001-S002	S001	control	1	m	5	155.503	0.240577	67	24	10	1	0	51	1	1	2	60	5
S001-S002	S001	control	1	m	5	158.932	0.195664	67	24	10	1	0	52	1	1	2	60	5
S001-S002	S001	control	1	m	5	145.449	0.162904	67	24	10	1	0	53	1	1	2	60	5
S001-S002	S001	control	1	m	5	125.05	0.197551	67	24	10	1	0	54	1	1	2	60	5
S001-S002	S001	control	1	m	5	147.326	0.219188	67	24	10	1	0	55	1	1	2	60	5
S001-S002	S001	control	1	m	5	144.99	0.179715	67	24	10	1	0	56	1	1	2	60	5
S001-S002	S001	control	1	m	5	113.035	0.236616	67	24	10	1	0	57	1	1	2	60	5
S001-S002	S001	control	1	m	5	136.632	0.20255	67	24	10	1	0	58	1	1	2	60	5
S001-S002	S001	control	1	m	5	157.542	0.24197	67	24	10	1	0	59	1	1	2	60	5
S001-S002	S001	control	1	m	6	341.182	0.799181	67	24	10	0	0	5	1	1	2	10	6
S001-S002	S001	control	1	m	6	171.081	0.386561	67	24	10	0	0	6	1	1	2	10	6
S001-S002	S001	control	1	m	6	94.7798	0.239775	67	24	10	0	0	7	1	1	2	10	6
S001-S002	S001	control	1	m	6	132.295	0.116486	67	24	10	1	1	8	1	1	2	10	6
S001-S002	S001	control	1	m	6	115.022	0.102938	67	24	10	1	0	9	1	1	2	10	6
S001-S002	S001	control	1	m	6	100.455	0.11013	67	24	10	1	0	10	1	1	2	10	6
S001-S002	S001	control	1	m	6	96.0094	0.117246	67	24	10	1	0	11	1	1	2	20	6
S001-S002	S001	control	1	m	6	82.5359	0.173375	67	24	10	1	0	12	1	1	2	20	6
S001-S002	S001	control	1	m	6	92.1232	0.21487	67	24	10	1	0	13	1	1	2	20	6
S001-S002	S001	control	1	m	6	120.006	0.169111	67	24	10	1	0	14	1	1	2	20	6
S001-S002	S001	control	1	m	6	97.5748	0.0953991	67	24	10	1	0	15	1	1	2	20	6
S001-S002	S001	control	1	m	6	98.9123	0.121495	67	24	10	1	0	16	1	1	2	20	6
S001-S002	S001	control	1	m	6	121.81	0.0890298	67	24	10	1	0	17	1	1	2	20	6
S001-S002	S001	control	1	m	6	134.799	0.120201	67	24	10	1	0	18	1	1	2	20	6
S001-S002	S001	control	1	m	6	134.403	0.165458	67	24	10	1	0	19	1	1	2	20	6
S001-S002	S001	control	1	m	6	122.927	0.140278	67	24	10	1	0	20	1	1	2	20	6
S001-S002	S001	control	1	m	6	132.236	0.157997	67	24	10	1	0	21	1	1	2	30	6
S001-S002	S001	control	1	m	6	127.654	0.186372	67	24	10	1	0	22	1	1	2	30	6
S001-S002	S001	control	1	m	6	109.544	0.12434	67	24	10	1	0	23	1	1	2	30	6
S001-S002	S001	control	1	m	6	142.636	0.149973	67	24	10	1	0	24	1	1	2	30	6
S001-S002	S001	control	1	m	6	91.9793	0.120344	67	24	10	1	0	25	1	1	2	30	6
S001-S002	S001	control	1	m	6	128.364	0.10842	67	24	10	1	0	26	1	1	2	30	6
S001-S002	S001	control	1	m	6	149.195	0.168344	67	24	10	1	0	27	1	1	2	30	6
S001-S002	S001	control	1	m	6	129.596	0.156984	67	24	10	1	0	28	1	1	2	30	6
S001-S002	S001	control	1	m	6	105.715	0.122457	67	24	10	1	0	29	1	1	2	30	6
S001-S002	S001	control	1	m	6	125.527	0.17864	67	24	10	1	0	30	1	1	2	30	6
S001-S002	S001	control	1	m	6	120.618	0.185972	67	24	10	1	0	31	1	1	2	40	6
S001-S002	S001	control	1	m	6	114.245	0.194273	67	24	10	1	0	32	1	1	2	40	6
S001-S002	S001	control	1	m	6	112.873	0.155866	67	24	10	1	0	33	1	1	2	40	6
S001-S002	S001	control	1	m	6	110.92	0.119883	67	24	10	1	0	34	1	1	2	40	6
S001-S002	S001	control	1	m	6	113.695	0.201628	67	24	10	1	0	35	1	1	2	40	6
S001-S002	S001	control	1	m	6	149.643	0.215691	67	24	10	1	0	36	1	1	2	40	6
S001-S002	S001	control	1	m	6	137.125	0.205455	67	24	10	1	0	37	1	1	2	40	6
S001-S002	S001	control	1	m	6	163.479	0.204265	67	24	10	1	0	38	1	1	2	40	6
S001-S002	S001	control	1	m	6	136.428	0.241887	67	24	10	1	0	39	1	1	2	40	6
S001-S002	S001	control	1	m	6	129.745	0.183336	67	24	10	1	0	40	1	1	2	40	6
S001-S002	S001	control	1	m	6	155.53	0.189949	67	24	10	1	0	41	1	1	2	50	6
S001-S002	S001	control	1	m	6	140.613	0.214569	67	24	10	1	0	42	1	1	2	50	6
S001-S002	S001	control	1	m	6	128.484	0.240985	67	24	10	1	0	43	1	1	2	50	6
S001-S002	S001	control	1	m	6	140.513	0.244077	67	24	10	1	0	44	1	1	2	50	6
S001-S002	S001	control	1	m	6	104.995	0.231621	67	24	10	1	0	45	1	1	2	50	6
S001-S002	S001	control	1	m	6	102.317	0.13858	67	24	10	1	0	46	1	1	2	50	6
S001-S002	S001	control	1	m	6	96.8515	0.202512	67	24	10	1	0	47	1	1	2	50	6
S001-S002	S001	control	1	m	6	122.55	0.198114	67	24	10	1	0	48	1	1	2	50	6
S001-S002	S001	control	1	m	6	105.722	0.20422	67	24	10	1	0	49	1	1	2	50	6
S001-S002	S001	control	1	m	6	104.254	0.188768	67	24	10	1	0	50	1	1	2	50	6
S001-S002	S001	control	1	m	6	129.339	0.142753	67	24	10	1	0	51	1	1	2	60	6
S001-S002	S001	control	1	m	6	135.561	0.20243	67	24	10	1	0	52	1	1	2	60	6
S001-S002	S001	control	1	m	6	121.33	0.2394	67	24	10	1	0	53	1	1	2	60	6
S001-S002	S001	control	1	m	6	140.581	0.289171	67	24	10	1	0	54	1	1	2	60	6
S001-S002	S001	control	1	m	6	90.9137	0.194933	67	24	10	1	0	55	1	1	2	60	6
S001-S002	S001	control	1	m	6	100.59	0.186667	67	24	10	1	0	56	1	1	2	60	6
S001-S002	S001	control	1	m	6	122.954	0.18255	67	24	10	1	0	57	1	1	2	60	6
S001-S002	S001	control	1	m	6	144.334	0.250908	67	24	10	1	0	58	1	1	2	60	6
S001-S002	S001	control	1	m	6	122.895	0.233209	67	24	10	1	0	59	1	1	2	60	6
S001-S002	S002	control	1	f	1	62.0886	0.290442	56	27	15	0	0	5	1	2	1	10	1
S001-S002	S002	control	1	f	1	135.691	0.168065	56	27	15	0	0	6	1	2	1	10	1
S001-S002	S002	control	1	f	1	114.751	0.329746	56	27	15	0	0	7	1	2	1	10	1
S001-S002	S002	control	1	f	1	185.533	0.261138	56	27	15	0	0	8	1	2	1	10	1
S001-S002	S002	control	1	f	1	141.637	0.214827	56	27	15	0	0	9	1	2	1	10	1
S001-S002	S002	control	1	f	1	117.18	0.184101	56	27	15	0	0	10	1	2	1	10	1
S001-S002	S002	control	1	f	1	133.289	0.227914	56	27	15	0	0	11	1	2	1	20	1
S001-S002	S002	control	1	f	1	115.712	0.109633	56	27	15	0	0	12	1	2	1	20	1
S001-S002	S002	control	1	f	1	122.604	0.165051	56	27	15	0	0	13	1	2	1	20	1
S001-S002	S002	control	1	f	1	104.234	0.181569	56	27	15	0	0	14	1	2	1	20	1
S001-S002	S002	control	1	f	1	94.3103	0.153259	56	27	15	0	0	15	1	2	1	20	1
S001-S002	S002	control	1	f	1	137.182	0.194239	56	27	15	0	0	16	1	2	1	20	1
S001-S002	S002	control	1	f	1	119.162	0.205109	56	27	15	0	0	17	1	2	1	20	1
S001-S002	S002	control	1	f	1	102.426	0.217466	56	27	15	0	0	18	1	2	1	20	1
S001-S002	S002	control	1	f	1	84.6876	0.193828	56	27	15	0	0	19	1	2	1	20	1
S001-S002	S002	control	1	f	1	126.917	0.141753	56	27	15	0	0	20	1	2	1	20	1
S001-S002	S002	control	1	f	1	123.918	0.181762	56	27	15	0	0	21	1	2	1	30	1
S001-S002	S002	control	1	f	1	81.7257	0.156077	56	27	15	0	0	22	1	2	1	30	1
S001-S002	S002	control	1	f	1	63.1458	0.145793	56	27	15	0	0	23	1	2	1	30	1
S001-S002	S002	control	1	f	1	85.2643	0.0811865	56	27	15	1	1	24	1	2	1	30	1
S001-S002	S002	control	1	f	1	108.184	0.177691	56	27	15	1	0	25	1	2	1	30	1
S001-S002	S002	control	1	f	1	95.9836	0.171483	56	27	15	1	0	26	1	2	1	30	1
S001-S002	S002	control	1	f	1	56.2852	0.143155	56	27	15	1	0	27	1	2	1	30	1
S001-S002	S002	control	1	f	1	75.9105	0.129889	56	27	15	1	0	28	1	2	1	30	1
S001-S002	S002	control	1	f	1	80.9258	0.202173	56	27	15	1	0	29	1	2	1	30	1
S001-S002	S002	control	1	f	1	65.5343	0.135868	56	27	15	1	0	30	1	2	1	30	1
S001-S002	S002	control	1	f	1	51.5191	0.13054	56	27	15	1	0	31	1	2	1	40	1
S001-S002	S002	control	1	f	1	63.234	0.142757	56	27	15	1	0	32	1	2	1	40	1
S001-S002	S002	control	1	f	1	94.4058	0.182179	56	27	15	1	0	33	1	2	1	40	1
S001-S002	S002	control	1	f	1	46.6886	0.152027	56	27	15	1	0	34	1	2	1	40	1
S001-S002	S002	control	1	f	1	64.0824	0.151379	56	27	15	1	0	35	1	2	1	40	1
S001-S002	S002	control	1	f	1	92.9881	0.215981	56	27	15	1	0	36	1	2	1	40	1
S001-S002	S002	control	1	f	1	115.352	0.181057	56	27	15	1	0	37	1	2	1	40	1
S001-S002	S002	control	1	f	1	59.7616	0.167133	56	27	15	1	0	38	1	2	1	40	1
S001-S002	S002	control	1	f	1	67.5078	0.147836	56	27	15	1	0	39	1	2	1	40	1
S001-S002	S002	control	1	f	1	58.9043	0.161832	56	27	15	1	0	40	1	2	1	40	1
S001-S002	S002	control	1	f	1	83.8458	0.147622	56	27	15	1	0	41	1	2	1	50	1
S001-S002	S002	control	1	f	1	81.2248	0.178838	56	27	15	1	0	42	1	2	1	50	1
S001-S002	S002	control	1	f	1	95.6798	0.203233	56	27	15	1	0	43	1	2	1	50	1
S001-S002	S002	control	1	f	1	131.419	0.256892	56	27	15	1	0	44	1	2	1	50	1
S001-S002	S002	control	1	f	1	81.5359	0.210376	56	27	15	1	0	45	1	2	1	50	1
S001-S002	S002	control	1	f	1	71.6284	0.154813	56	27	15	1	0	46	1	2	1	50	1
S001-S002	S002	control	1	f	1	90.1524	0.211734	56	27	15	1	0	47	1	2	1	50	1
S001-S002	S002	control	1	f	1	88.5018	0.178717	56	27	15	1	0	48	1	2	1	50	1
S001-S002	S002	control	1	f	1	66.4788	0.205865	56	27	15	1	0	49	1	2	1	50	1
S001-S002	S002	control	1	f	1	78.5621	0.138476	56	27	15	1	0	50	1	2	1	50	1
S001-S002	S002	control	1	f	1	108.342	0.232486	56	27	15	1	0	51	1	2	1	60	1
S001-S002	S002	control	1	f	1	114.313	0.150728	56	27	15	1	0	52	1	2	1	60	1
S001-S002	S002	control	1	f	1	130.016	0.246624	56	27	15	1	0	53	1	2	1	60	1
S001-S002	S002	control	1	f	1	101.773	0.156497	56	27	15	0	0	54	1	2	1	60	1
S001-S002	S002	control	1	f	1	115.209	0.100925	56	27	15	0	0	55	1	2	1	60	1
S001-S002	S002	control	1	f	1	83.6922	0.178387	56	27	15	0	0	56	1	2	1	60	1
S001-S002	S002	control	1	f	1	96.967	0.144972	56	27	15	0	0	57	1	2	1	60	1
S001-S002	S002	control	1	f	1	49.3132	0.15214	56	27	15	0	0	58	1	2	1	60	1
S001-S002	S002	control	1	f	1	81.3522	0.0934287	56	27	15	0	0	59	1	2	1	60	1
S001-S002	S002	control	1	f	2	175.301	0.432213	56	27	15	0	0	5	1	2	1	10	2
S001-S002	S002	control	1	f	2	179.048	0.526696	56	27	15	0	0	6	1	2	1	10	2
S001-S002	S002	control	1	f	2	145.461	0.279161	56	27	15	0	0	7	1	2	1	10	2
S001-S002	S002	control	1	f	2	156.928	0.3372	56	27	15	0	0	8	1	2	1	10	2
S001-S002	S002	control	1	f	2	222.284	0.645939	56	27	15	0	0	9	1	2	1	10	2
S001-S002	S002	control	1	f	2	230.902	0.631843	56	27	15	0	0	10	1	2	1	10	2
S001-S002	S002	control	1	f	2	215.43	0.490054	56	27	15	0	0	11	1	2	1	20	2
S001-S002	S002	control	1	f	2	155.97	0.367069	56	27	15	0	0	12	1	2	1	20	2
S001-S002	S002	control	1	f	2	119.338	0.25186	56	27	15	0	0	13	1	2	1	20	2
S001-S002	S002	control	1	f	2	136.359	0.214275	56	27	15	0	0	14	1	2	1	20	2
S001-S002	S002	control	1	f	2	148.474	0.340177	56	27	15	0	0	15	1	2	1	20	2
S001-S002	S002	control	1	f	2	158.923	0.375738	56	27	15	0	0	16	1	2	1	20	2
S001-S002	S002	control	1	f	2	135.09	0.360245	56	27	15	0	0	17	1	2	1	20	2
S001-S002	S002	control	1	f	2	130.108	0.269063	56	27	15	1	1	18	1	2	1	20	2
S001-S002	S002	control	1	f	2	191.722	0.472012	56	27	15	1	0	19	1	2	1	20	2
S001-S002	S002	control	1	f	2	180.012	0.509061	56	27	15	1	0	20	1	2	1	20	2
S001-S002	S002	control	1	f	2	130.364	0.264108	56	27	15	0	0	21	1	2	1	30	2
S001-S002	S002	control	1	f	2	136.863	0.278407	56	27	15	0	0	22	1	2	1	30	2
S001-S002	S002	control	1	f	2	141.224	0.373194	56	27	15	0	0	23	1	2	1	30	2
S001-S002	S002	control	1	f	2	179.988	0.435028	56	27	15	0	0	24	1	2	1	30	2
S001-S002	S002	control	1	f	2	155.87	0.401237	56	27	15	0	0	25	1	2	1	30	2
S001-S002	S002	control	1	f	2	143.137	0.311921	56	27	15	0	0	26	1	2	1	30	2
S001-S002	S002	control	1	f	2	148.776	0.243349	56	27	15	0	0	27	1	2	1	30	2
S001-S002	S002	control	1	f	2	82.6519	0.204766	56	27	15	0	0	28	1	2	1	30	2
S001-S002	S002	control	1	f	2	130.43	0.256307	56	27	15	1	1	29	1	2	1	30	2
S001-S002	S002	control	1	f	2	166.402	0.367809	56	27	15	1	0	30	1	2	1	30	2
S001-S002	S002	control	1	f	2	140.603	0.323333	56	27	15	1	0	31	1	2	1	40	2
S001-S002	S002	control	1	f	2	128.118	0.275418	56	27	15	1	0	32	1	2	1	40	2
S001-S002	S002	control	1	f	2	151.64	0.298816	56	27	15	1	0	33	1	2	1	40	2
S001-S002	S002	control	1	f	2	138.157	0.176564	56	27	15	1	0	34	1	2	1	40	2
S001-S002	S002	control	1	f	2	130.401	0.174617	56	27	15	1	0	35	1	2	1	40	2
S001-S002	S002	control	1	f	2	151.822	0.254387	56	27	15	0	0	36	1	2	1	40	2
S001-S002	S002	control	1	f	2	154.968	0.402559	56	27	15	0	0	37	1	2	1	40	2
S001-S002	S002	control	1	f	2	205.713	0.495283	56	27	15	0	0	38	1	2	1	40	2
S001-S002	S002	control	1	f	2	167.051	0.464199	56	27	15	0	0	39	1	2	1	40	2
S001-S002	S002	control	1	f	2	146.485	0.292377	56	27	15	0	0	40	1	2	1	40	2
S001-S002	S002	control	1	f	2	86.4917	0.238246	56	27	15	0	0	41	1	2	1	50	2
S001-S002	S002	control	1	f	2	147.506	0.274207	56	27	15	0	0	42	1	2	1	50	2
S001-S002	S002	control	1	f	2	149.995	0.347258	56	27	15	0	0	43	1	2	1	50	2
S001-S002	S002	control	1	f	2	159.067	0.465493	56	27	15	1	1	44	1	2	1	50	2
S001-S002	S002	control	1	f	2	151.123	0.377016	56	27	15	1	0	45	1	2	1	50	2
S001-S002	S002	control	1	f	2	158.867	0.295485	56	27	15	1	0	46	1	2	1	50	2
S001-S002	S002	control	1	f	2	99.3111	0.158619	56	27	15	1	0	47	1	2	1	50	2
S001-S002	S002	control	1	f	2	89.1146	0.163097	56	27	15	1	0	48	1	2	1	50	2
S001-S002	S002	control	1	f	2	116.469	0.171476	56	27	15	1	0	49	1	2	1	50	2
S001-S002	S002	control	1	f	2	122.037	0.222667	56	27	15	1	0	50	1	2	1	50	2
S001-S002	S002	control	1	f	2	99.6507	0.190595	56	27	15	1	0	51	1	2	1	60	2
S001-S002	S002	control	1	f	2	102.777	0.215141	56	27	15	1	0	52	1	2	1	60	2
S001-S002	S002	control	1	f	2	152.641	0.293016	56	27	15	1	0	53	1	2	1	60	2
S001-S002	S002	control	1	f	2	130.29	0.320805	56	27	15	1	0	54	1	2	1	60	2
S001-S002	S002	control	1	f	2	133.503	0.204012	56	27	15	1	0	55	1	2	1	60	2
S001-S002	S002	control	1	f	2	124.998	0.182586	56	27	15	1	0	56	1	2	1	60	2
S001-S002	S002	control	1	f	2	94.0965	0.172272	56	27	15	1	0	57	1	2	1	60	2
S001-S002	S002	control	1	f	2	127.563	0.218237	56	27	15	1	0	58	1	2	1	60	2
S001-S002	S002	control	1	f	2	106.734	0.137511	56	27	15	1	0	59	1	2	1	60	2
S001-S002	S002	control	1	f	3	110.449	0.139774	56	27	15	0	0	5	1	2	1	10	3
S001-S002	S002	control	1	f	3	150.076	0.349066	56	27	15	0	0	6	1	2	1	10	3
S001-S002	S002	control	1	f	3	136.66	0.284277	56	27	15	0	0	7	1	2	1	10	3
S001-S002	S002	control	1	f	3	108.358	0.276026	56	27	15	0	0	8	1	2	1	10	3
S001-S002	S002	control	1	f	3	106.236	0.190428	56	27	15	0	0	9	1	2	1	10	3
S001-S002	S002	control	1	f	3	111.066	0.215297	56	27	15	0	0	10	1	2	1	10	3
S001-S002	S002	control	1	f	3	108.36	0.233832	56	27	15	0	0	11	1	2	1	20	3
S001-S002	S002	control	1	f	3	80.9415	0.146142	56	27	15	0	0	12	1	2	1	20	3
S001-S002	S002	control	1	f	3	97.1087	0.177033	56	27	15	1	1	13	1	2	1	20	3
S001-S002	S002	control	1	f	3	98.5648	0.220009	56	27	15	1	0	14	1	2	1	20	3
S001-S002	S002	control	1	f	3	121.767	0.187635	56	27	15	1	0	15	1	2	1	20	3
S001-S002	S002	control	1	f	3	113.104	0.200212	56	27	15	1	0	16	1	2	1	20	3
S001-S002	S002	control	1	f	3	112.674	0.177653	56	27	15	1	0	17	1	2	1	20	3
S001-S002	S002	control	1	f	3	82.1109	0.186958	56	27	15	1	0	18	1	2	1	20	3
S001-S002	S002	control	1	f	3	111.518	0.164723	56	27	15	1	0	19	1	2	1	20	3
S001-S002	S002	control	1	f	3	115.333	0.233209	56	27	15	1	0	20	1	2	1	20	3
S001-S002	S002	control	1	f	3	134.742	0.232633	56	27	15	1	0	21	1	2	1	30	3
S001-S002	S002	control	1	f	3	131.976	0.239375	56	27	15	1	0	22	1	2	1	30	3
S001-S002	S002	control	1	f	3	125.004	0.187108	56	27	15	1	0	23	1	2	1	30	3
S001-S002	S002	control	1	f	3	132.448	0.242103	56	27	15	1	0	24	1	2	1	30	3
S001-S002	S002	control	1	f	3	112.056	0.174919	56	27	15	1	0	25	1	2	1	30	3
S001-S002	S002	control	1	f	3	123.524	0.171671	56	27	15	1	0	26	1	2	1	30	3
S001-S002	S002	control	1	f	3	97.011	0.197466	56	27	15	1	0	27	1	2	1	30	3
S001-S002	S002	control	1	f	3	93.368	0.149552	56	27	15	1	0	28	1	2	1	30	3
S001-S002	S002	control	1	f	3	86.5689	0.139575	56	27	15	1	0	29	1	2	1	30	3
S001-S002	S002	control	1	f	3	84.8211	0.114912	56	27	15	1	0	30	1	2	1	30	3
S001-S002	S002	control	1	f	3	91.354	0.133156	56	27	15	1	0	31	1	2	1	40	3
S001-S002	S002	control	1	f	3	93.9839	0.210402	56	27	15	1	0	32	1	2	1	40	3
S001-S002	S002	control	1	f	3	104.138	0.185603	56	27	15	1	0	33	1	2	1	40	3
S001-S002	S002	control	1	f	3	115.267	0.214778	56	27	15	1	0	34	1	2	1	40	3
S001-S002	S002	control	1	f	3	106.93	0.22809	56	27	15	1	0	35	1	2	1	40	3
S001-S002	S002	control	1	f	3	114.427	0.189232	56	27	15	1	0	36	1	2	1	40	3
S001-S002	S002	control	1	f	3	108.74	0.218735	56	27	15	1	0	37	1	2	1	40	3
S001-S002	S002	control	1	f	3	100.947	0.15211	56	27	15	1	0	38	1	2	1	40	3
S001-S002	S002	control	1	f	3	111.731	0.199428	56	27	15	1	0	39	1	2	1	40	3
S001-S002	S002	control	1	f	3	128.728	0.18974	56	27	15	1	0	40	1	2	1	40	3
S001-S002	S002	control	1	f	3	124.173	0.196148	56	27	15	1	0	41	1	2	1	50	3
S001-S002	S002	control	1	f	3	121.373	0.191518	56	27	15	1	0	42	1	2	1	50	3
S001-S002	S002	control	1	f	3	68.3405	0.117759	56	27	15	1	0	43	1	2	1	50	3
S001-S002	S002	control	1	f	3	69.1526	0.109002	56	27	15	1	0	44	1	2	1	50	3
S001-S002	S002	control	1	f	3	70.8729	0.123633	56	27	15	1	0	45	1	2	1	50	3
S001-S002	S002	control	1	f	3	83.8838	0.167533	56	27	15	1	0	46	1	2	1	50	3
S001-S002	S002	control	1	f	3	99.0561	0.136759	56	27	15	1	0	47	1	2	1	50	3
S001-S002	S002	control	1	f	3	85.8618	0.143618	56	27	15	1	0	48	1	2	1	50	3
S001-S002	S002	control	1	f	3	94.0903	0.165255	56	27	15	1	0	49	1	2	1	50	3
S001-S002	S002	control	1	f	3	88.0976	0.150272	56	27	15	1	0	50	1	2	1	50	3
S001-S002	S002	control	1	f	3	116.549	0.14445	56	27	15	1	0	51	1	2	1	60	3
S001-S002	S002	control	1	f	3	94.5169	0.177783	56	27	15	1	0	52	1	2	1	60	3
S001-S002	S002	control	1	f	3	112.611	0.210393	56	27	15	1	0	53	1	2	1	60	3
S001-S002	S002	control	1	f	3	82.1833	0.137125	56	27	15	1	0	54	1	2	1	60	3
S001-S002	S002	control	1	f	3	138.271	0.226206	56	27	15	1	0	55	1	2	1	60	3
S001-S002	S002	control	1	f	3	132.267	0.260536	56	27	15	1	0	56	1	2	1	60	3
S001-S002	S002	control	1	f	3	151.742	0.220769	56	27	15	1	0	57	1	2	1	60	3
S001-S002	S002	control	1	f	3	144.477	0.257228	56	27	15	1	0	58	1	2	1	60	3
S001-S002	S002	control	1	f	3	132.042	0.2311	56	27	15	0	0	59	1	2	1	60	3
S001-S002	S002	control	1	f	4	238.859	0.412895	56	27	15	0	0	5	1	2	1	10	4
S001-S002	S002	control	1	f	4	194.85	0.33112	56	27	15	0	0	6	1	2	1	10	4
S001-S002	S002	control	1	f	4	223.687	0.409068	56	27	15	0	0	7	1	2	1	10	4
S001-S002	S002	control	1	f	4	177.75	0.396164	56	27	15	0	0	8	1	2	1	10	4
S001-S002	S002	control	1	f	4	194.557	0.355203	56	27	15	0	0	9	1	2	1	10	4
S001-S002	S002	control	1	f	4	133.423	0.317455	56	27	15	0	0	10	1	2	1	10	4
S001-S002	S002	control	1	f	4	157.224	0.15941	56	27	15	0	0	11	1	2	1	20	4
S001-S002	S002	control	1	f	4	167.688	0.2214	56	27	15	0	0	12	1	2	1	20	4
S001-S002	S002	control	1	f	4	160.997	0.254517	56	27	15	0	0	13	1	2	1	20	4
S001-S002	S002	control	1	f	4	166.338	0.171107	56	27	15	0	0	14	1	2	1	20	4
S001-S002	S002	control	1	f	4	155.963	0.15626	56	27	15	0	0	15	1	2	1	20	4
S001-S002	S002	control	1	f	4	155.451	0.139417	56	27	15	0	0	16	1	2	1	20	4
S001-S002	S002	control	1	f	4	152.791	0.20835	56	27	15	1	1	17	1	2	1	20	4
S001-S002	S002	control	1	f	4	147.342	0.128635	56	27	15	1	0	18	1	2	1	20	4
S001-S002	S002	control	1	f	4	147.785	0.129866	56	27	15	1	0	19	1	2	1	20	4
S001-S002	S002	control	1	f	4	140.542	0.146854	56	27	15	1	0	20	1	2	1	20	4
S001-S002	S002	control	1	f	4	149.472	0.185949	56	27	15	1	0	21	1	2	1	30	4
S001-S002	S002	control	1	f	4	142.888	0.135833	56	27	15	1	0	22	1	2	1	30	4
S001-S002	S002	control	1	f	4	141.87	0.168944	56	27	15	1	0	23	1	2	1	30	4
S001-S002	S002	control	1	f	4	123.057	0.19916	56	27	15	1	0	24	1	2	1	30	4
S001-S002	S002	control	1	f	4	161.204	0.163857	56	27	15	1	0	25	1	2	1	30	4
S001-S002	S002	control	1	f	4	154.93	0.197246	56	27	15	1	0	26	1	2	1	30	4
S001-S002	S002	control	1	f	4	167.846	0.20949	56	27	15	1	0	27	1	2	1	30	4
S001-S002	S002	control	1	f	4	149.388	0.293555	56	27	15	1	0	28	1	2	1	30	4
S001-S002	S002	control	1	f	4	176.48	0.175001	56	27	15	1	0	29	1	2	1	30	4
S001-S002	S002	control	1	f	4	159.269	0.110404	56	27	15	1	0	30	1	2	1	30	4
S001-S002	S002	control	1	f	4	157.32	0.163735	56	27	15	1	0	31	1	2	1	40	4
S001-S002	S002	control	1	f	4	141.712	0.114598	56	27	15	1	0	32	1	2	1	40	4
S001-S002	S002	control	1	f	4	132.389	0.139085	56	27	15	1	0	33	1	2	1	40	4
S001-S002	S002	control	1	f	4	146.362	0.124663	56	27	15	1	0	34	1	2	1	40	4
S001-S002	S002	control	1	f	4	131.501	0.131543	56	27	15	1	0	35	1	2	1	40	4
S001-S002	S002	control	1	f	4	131.211	0.128449	56	27	15	1	0	36	1	2	1	40	4
S001-S002	S002	control	1	f	4	128.741	0.116461	56	27	15	1	0	37	1	2	1	40	4
S001-S002	S002	control	1	f	4	141.843	0.132384	56	27	15	1	0	38	1	2	1	40	4
S001-S002	S002	control	1	f	4	152.137	0.1032	56	27	15	1	0	39	1	2	1	40	4
S001-S002	S002	control	1	f	4	140.141	0.153689	56	27	15	1	0	40	1	2	1	40	4
S001-S002	S002	control	1	f	4	137.152	0.136774	56	27	15	1	0	41	1	2	1	50	4
S001-S002	S002	control	1	f	4	141.353	0.115436	56	27	15	1	0	42	1	2	1	50	4
S001-S002	S002	control	1	f	4	176.829	0.163756	56	27	15	1	0	43	1	2	1	50	4
S001-S002	S002	control	1	f	4	172.481	0.23075	56	27	15	1	0	44	1	2	1	50	4
S001-S002	S002	control	1	f	4	149.086	0.185726	56	27	15	1	0	45	1	2	1	50	4
S001-S002	S002	control	1	f	4	148.317	0.170527	56	27	15	1	0	46	1	2	1	50	4
S001-S002	S002	control	1	f	4	170.532	0.122175	56	27	15	1	0	47	1	2	1	50	4
S001-S002	S002	control	1	f	4	170.85	0.100949	56	27	15	1	0	48	1	2	1	50	4
S001-S002	S002	control	1	f	4	159.934	0.133062	56	27	15	1	0	49	1	2	1	50	4
S001-S002	S002	control	1	f	4	166.047	0.157871	56	27	15	1	0	50	1	2	1	50	4
S001-S002	S002	control	1	f	4	181.251	0.138018	56	27	15	1	0	51	1	2	1	60	4
S001-S002	S002	control	1	f	4	168.673	0.101595	56	27	15	1	0	52	1	2	1	60	4
S001-S002	S002	control	1	f	4	175.271	0.132032	56	27	15	1	0	53	1	2	1	60	4
S001-S002	S002	control	1	f	4	187.001	0.159524	56	27	15	1	0	54	1	2	1	60	4
S001-S002	S002	control	1	f	4	166.706	0.20599	56	27	15	1	0	55	1	2	1	60	4
S001-S002	S002	control	1	f	4	190.672	0.160186	56	27	15	1	0	56	1	2	1	60	4
S001-S002	S002	control	1	f	4	173.952	0.130027	56	27	15	1	0	57	1	2	1	60	4
S001-S002	S002	control	1	f	4	183.383	0.109679	56	27	15	1	0	58	1	2	1	60	4
S001-S002	S002	control	1	f	4	202.208	0.140171	56	27	15	1	0	59	1	2	1	60	4
S001-S002	S002	control	1	f	5	154.883	0.355562	56	27	15	0	0	5	1	2	1	10	5
S001-S002	S002	control	1	f	5	100.768	0.178714	56	27	15	0	0	6	1	2	1	10	5
S001-S002	S002	control	1	f	5	176.101	0.356426	56	27	15	0	0	7	1	2	1	10	5
S001-S002	S002	control	1	f	5	161.274	0.399124	56	27	15	0	0	8	1	2	1	10	5
S001-S002	S002	control	1	f	5	120.472	0.190855	56	27	15	0	0	9	1	2	1	10	5
S001-S002	S002	control	1	f	5	196.438	0.301529	56	27	15	0	0	10	1	2	1	10	5
S001-S002	S002	control	1	f	5	161.816	0.21908	56	27	15	0	0	11	1	2	1	20	5
S001-S002	S002	control	1	f	5	122.984	0.192085	56	27	15	1	1	12	1	2	1	20	5
S001-S002	S002	control	1	f	5	158.018	0.183342	56	27	15	1	0	13	1	2	1	20	5
S001-S002	S002	control	1	f	5	151.505	0.224005	56	27	15	1	0	14	1	2	1	20	5
S001-S002	S002	control	1	f	5	110.079	0.332598	56	27	15	1	0	15	1	2	1	20	5
S001-S002	S002	control	1	f	5	157.801	0.248348	56	27	15	1	0	16	1	2	1	20	5
S001-S002	S002	control	1	f	5	152.3	0.27693	56	27	15	1	0	17	1	2	1	20	5
S001-S002	S002	control	1	f	5	134.166	0.260695	56	27	15	1	0	18	1	2	1	20	5
S001-S002	S002	control	1	f	5	109.432	0.168782	56	27	15	1	0	19	1	2	1	20	5
S001-S002	S002	control	1	f	5	127.034	0.208035	56	27	15	1	0	20	1	2	1	20	5
S001-S002	S002	control	1	f	5	147.656	0.253132	56	27	15	1	0	21	1	2	1	30	5
S001-S002	S002	control	1	f	5	133.868	0.314614	56	27	15	1	0	22	1	2	1	30	5
S001-S002	S002	control	1	f	5	190.182	0.298704	56	27	15	1	0	23	1	2	1	30	5
S001-S002	S002	control	1	f	5	178.96	0.263675	56	27	15	1	0	24	1	2	1	30	5
S001-S002	S002	control	1	f	5	97.2434	0.168012	56	27	15	1	0	25	1	2	1	30	5
S001-S002	S002	control	1	f	5	105.182	0.168282	56	27	15	1	0	26	1	2	1	30	5
S001-S002	S002	control	1	f	5	114.443	0.118024	56	27	15	1	0	27	1	2	1	30	5
S001-S002	S002	control	1	f	5	103.639	0.148215	56	27	15	1	0	28	1	2	1	30	5
S001-S002	S002	control	1	f	5	121.326	0.290036	56	27	15	1	0	29	1	2	1	30	5
S001-S002	S002	control	1	f	5	176.223	0.282816	56	27	15	1	0	30	1	2	1	30	5
S001-S002	S002	control	1	f	5	166.226	0.323227	56	27	15	1	0	31	1	2	1	40	5
S001-S002	S002	control	1	f	5	148.117	0.233686	56	27	15	1	0	32	1	2	1	40	5
S001-S002	S002	control	1	f	5	124.532	0.169135	56	27	15	1	0	33	1	2	1	40	5
S001-S002	S002	control	1	f	5	168.027	0.169107	56	27	15	1	0	34	1	2	1	40	5
S001-S002	S002	control	1	f	5	181.308	0.253893	56	27	15	1	0	35	1	2	1	40	5
S001-S002	S002	control	1	f	5	126.573	0.241592	56	27	15	1	0	36	1	2	1	40	5
S001-S002	S002	control	1	f	5	138.427	0.180798	56	27	15	1	0	37	1	2	1	40	5
S001-S002	S002	control	1	f	5	164.319	0.242585	56	27	15	1	0	38	1	2	1	40	5
S001-S002	S002	control	1	f	5	171.003	0.21251	56	27	15	1	0	39	1	2	1	40	5
S001-S002	S002	control	1	f	5	138.985	0.289378	56	27	15	1	0	40	1	2	1	40	5
S001-S002	S002	control	1	f	5	185.073	0.22824	56	27	15	1	0	41	1	2	1	50	5
S001-S002	S002	control	1	f	5	164.017	0.217345	56	27	15	1	0	42	1	2	1	50	5
S001-S002	S002	control	1	f	5	157.53	0.167356	56	27	15	1	0	43	1	2	1	50	5
S001-S002	S002	control	1	f	5	149.662	0.154983	56	27	15	1	0	44	1	2	1	50	5
S001-S002	S002	control	1	f	5	163.839	0.217478	56	27	15	1	0	45	1	2	1	50	5
S001-S002	S002	control	1	f	5	159.852	0.141285	56	27	15	1	0	46	1	2	1	50	5
S001-S002	S002	control	1	f	5	143.088	0.241425	56	27	15	1	0	47	1	2	1	50	5
S001-S002	S002	control	1	f	5	187.869	0.232853	56	27	15	1	0	48	1	2	1	50	5
S001-S002	S002	control	1	f	5	177.566	0.205495	56	27	15	1	0	49	1	2	1	50	5
S001-S002	S002	control	1	f	5	129.811	0.219907	56	27	15	1	0	50	1	2	1	50	5
S001-S002	S002	control	1	f	5	155.503	0.240577	56	27	15	1	0	51	1	2	1	60	5
S001-S002	S002	control	1	f	5	158.932	0.195664	56	27	15	1	0	52	1	2	1	60	5
S001-S002	S002	control	1	f	5	145.449	0.162904	56	27	15	1	0	53	1	2	1	60	5
S001-S002	S002	control	1	f	5	125.05	0.197551	56	27	15	1	0	54	1	2	1	60	5
S001-S002	S002	control	1	f	5	147.326	0.219188	56	27	15	1	0	55	1	2	1	60	5
S001-S002	S002	control	1	f	5	144.99	0.179715	56	27	15	1	0	56	1	2	1	60	5
S001-S002	S002	control	1	f	5	113.035	0.236616	56	27	15	1	0	57	1	2	1	60	5
S001-S002	S002	control	1	f	5	136.632	0.20255	56	27	15	1	0	58	1	2	1	60	5
S001-S002	S002	control	1	f	5	157.542	0.24197	56	27	15	1	0	59	1	2	1	60	5
S001-S002	S002	control	1	f	6	341.182	0.799181	56	27	15	0	0	5	1	2	1	10	6
S001-S002	S002	control	1	f	6	171.081	0.386561	56	27	15	0	0	6	1	2	1	10	6
S001-S002	S002	control	1	f	6	94.7798	0.239775	56	27	15	0	0	7	1	2	1	10	6
S001-S002	S002	control	1	f	6	132.295	0.116486	56	27	15	0	0	8	1	2	1	10	6
S001-S002	S002	control	1	f	6	115.022	0.102938	56	27	15	0	0	9	1	2	1	10	6
S001-S002	S002	control	1	f	6	100.455	0.11013	56	27	15	0	0	10	1	2	1	10	6
S001-S002	S002	control	1	f	6	96.0094	0.117246	56	27	15	1	1	11	1	2	1	20	6
S001-S002	S002	control	1	f	6	82.5359	0.173375	56	27	15	1	0	12	1	2	1	20	6
S001-S002	S002	control	1	f	6	92.1232	0.21487	56	27	15	1	0	13	1	2	1	20	6
S001-S002	S002	control	1	f	6	120.006	0.169111	56	27	15	1	0	14	1	2	1	20	6
S001-S002	S002	control	1	f	6	97.5748	0.0953991	56	27	15	1	0	15	1	2	1	20	6
S001-S002	S002	control	1	f	6	98.9123	0.121495	56	27	15	1	0	16	1	2	1	20	6
S001-S002	S002	control	1	f	6	121.81	0.0890298	56	27	15	1	0	17	1	2	1	20	6
S001-S002	S002	control	1	f	6	134.799	0.120201	56	27	15	1	0	18	1	2	1	20	6
S001-S002	S002	control	1	f	6	134.403	0.165458	56	27	15	1	0	19	1	2	1	20	6
S001-S002	S002	control	1	f	6	122.927	0.140278	56	27	15	1	0	20	1	2	1	20	6
S001-S002	S002	control	1	f	6	132.236	0.157997	56	27	15	1	0	21	1	2	1	30	6
S001-S002	S002	control	1	f	6	127.654	0.186372	56	27	15	1	0	22	1	2	1	30	6
S001-S002	S002	control	1	f	6	109.544	0.12434	56	27	15	1	0	23	1	2	1	30	6
S001-S002	S002	control	1	f	6	142.636	0.149973	56	27	15	1	0	24	1	2	1	30	6
S001-S002	S002	control	1	f	6	91.9793	0.120344	56	27	15	1	0	25	1	2	1	30	6
S001-S002	S002	control	1	f	6	128.364	0.10842	56	27	15	1	0	26	1	2	1	30	6
S001-S002	S002	control	1	f	6	149.195	0.168344	56	27	15	1	0	27	1	2	1	30	6
S001-S002	S002	control	1	f	6	129.596	0.156984	56	27	15	1	0	28	1	2	1	30	6
S001-S002	S002	control	1	f	6	105.715	0.122457	56	27	15	1	0	29	1	2	1	30	6
S001-S002	S002	control	1	f	6	125.527	0.17864	56	27	15	1	0	30	1	2	1	30	6
S001-S002	S002	control	1	f	6	120.618	0.185972	56	27	15	1	0	31	1	2	1	40	6
S001-S002	S002	control	1	f	6	114.245	0.194273	56	27	15	1	0	32	1	2	1	40	6
S001-S002	S002	control	1	f	6	112.873	0.155866	56	27	15	1	0	33	1	2	1	40	6
S001-S002	S002	control	1	f	6	110.92	0.119883	56	27	15	1	0	34	1	2	1	40	6
S001-S002	S002	control	1	f	6	113.695	0.201628	56	27	15	1	0	35	1	2	1	40	6
S001-S002	S002	control	1	f	6	149.643	0.215691	56	27	15	1	0	36	1	2	1	40	6
S001-S002	S002	control	1	f	6	137.125	0.205455	56	27	15	1	0	37	1	2	1	40	6
S001-S002	S002	control	1	f	6	163.479	0.204265	56	27	15	1	0	38	1	2	1	40	6
S001-S002	S002	control	1	f	6	136.428	0.241887	56	27	15	1	0	39	1	2	1	40	6
S001-S002	S002	control	1	f	6	129.745	0.183336	56	27	15	1	0	40	1	2	1	40	6
S001-S002	S002	control	1	f	6	155.53	0.189949	56	27	15	1	0	41	1	2	1	50	6
S001-S002	S002	control	1	f	6	140.613	0.214569	56	27	15	1	0	42	1	2	1	50	6
S001-S002	S002	control	1	f	6	128.484	0.240985	56	27	15	1	0	43	1	2	1	50	6
S001-S002	S002	control	1	f	6	140.513	0.244077	56	27	15	1	0	44	1	2	1	50	6
S001-S002	S002	control	1	f	6	104.995	0.231621	56	27	15	1	0	45	1	2	1	50	6
S001-S002	S002	control	1	f	6	102.317	0.13858	56	27	15	1	0	46	1	2	1	50	6
S001-S002	S002	control	1	f	6	96.8515	0.202512	56	27	15	1	0	47	1	2	1	50	6
S001-S002	S002	control	1	f	6	122.55	0.198114	56	27	15	1	0	48	1	2	1	50	6
S001-S002	S002	control	1	f	6	105.722	0.20422	56	27	15	1	0	49	1	2	1	50	6
S001-S002	S002	control	1	f	6	104.254	0.188768	56	27	15	1	0	50	1	2	1	50	6
S001-S002	S002	control	1	f	6	129.339	0.142753	56	27	15	1	0	51	1	2	1	60	6
S001-S002	S002	control	1	f	6	135.561	0.20243	56	27	15	1	0	52	1	2	1	60	6
S001-S002	S002	control	1	f	6	121.33	0.2394	56	27	15	1	0	53	1	2	1	60	6
S001-S002	S002	control	1	f	6	140.581	0.289171	56	27	15	1	0	54	1	2	1	60	6
S001-S002	S002	control	1	f	6	90.9137	0.194933	56	27	15	1	0	55	1	2	1	60	6
S001-S002	S002	control	1	f	6	100.59	0.186667	56	27	15	1	0	56	1	2	1	60	6
S001-S002	S002	control	1	f	6	122.954	0.18255	56	27	15	1	0	57	1	2	1	60	6
S001-S002	S002	control	1	f	6	144.334	0.250908	56	27	15	1	0	58	1	2	1	60	6
S001-S002	S002	control	1	f	6	122.895	0.233209	56	27	15	1	0	59	1	2	1	60	6
S003-S004	S003	control	2	m	1	71.8625	0.273298	54	31	11	0	0	5	2	3	2	10	1
S003-S004	S003	control	2	m	1	96.4195	0.345063	54	31	11	0	0	6	2	3	2	10	1
S003-S004	S003	control	2	m	1	90.9067	0.404199	54	31	11	0	0	7	2	3	2	10	1
S003-S004	S003	control	2	m	1	103.311	0.424408	54	31	11	0	0	8	2	3	2	10	1
S003-S004	S003	control	2	m	1	130.873	0.578061	54	31	11	0	0	9	2	3	2	10	1
S003-S004	S003	control	2	m	1	122.807	0.572979	54	31	11	0	0	10	2	3	2	10	1
S003-S004	S003	control	2	m	1	79.1614	0.356927	54	31	11	0	0	11	2	3	2	20	1
S003-S004	S003	control	2	m	1	62.9637	0.306721	54	31	11	0	0	12	2	3	2	20	1
S003-S004	S003	control	2	m	1	49.3398	0.210512	54	31	11	0	0	13	2	3	2	20	1
S003-S004	S003	control	2	m	1	130.22	0.610854	54	31	11	0	0	14	2	3	2	20	1
S003-S004	S003	control	2	m	1	117.637	0.646547	54	31	11	0	0	15	2	3	2	20	1
S003-S004	S003	control	2	m	1	65.0569	0.341319	54	31	11	0	0	16	2	3	2	20	1
S003-S004	S003	control	2	m	1	91.8199	0.339631	54	31	11	0	0	17	2	3	2	20	1
S003-S004	S003	control	2	m	1	96.866	0.505194	54	31	11	0	0	18	2	3	2	20	1
S003-S004	S003	control	2	m	1	90.5972	0.394317	54	31	11	0	0	19	2	3	2	20	1
S003-S004	S003	control	2	m	1	55.7198	0.209193	54	31	11	0	0	20	2	3	2	20	1
S003-S004	S003	control	2	m	1	59.8629	0.240878	54	31	11	0	0	21	2	3	2	30	1
S003-S004	S003	control	2	m	1	68.4513	0.303348	54	31	11	0	0	22	2	3	2	30	1
S003-S004	S003	control	2	m	1	46.9156	0.165017	54	31	11	0	0	23	2	3	2	30	1
S003-S004	S003	control	2	m	1	40.9915	0.184298	54	31	11	0	0	24	2	3	2	30	1
S003-S004	S003	control	2	m	1	55.6229	0.224358	54	31	11	0	0	25	2	3	2	30	1
S003-S004	S003	control	2	m	1	59.5747	0.224875	54	31	11	1	1	26	2	3	2	30	1
S003-S004	S003	control	2	m	1	42.748	0.179845	54	31	11	1	0	27	2	3	2	30	1
S003-S004	S003	control	2	m	1	53.8923	0.247507	54	31	11	1	0	28	2	3	2	30	1
S003-S004	S003	control	2	m	1	49.3072	0.229016	54	31	11	1	0	29	2	3	2	30	1
S003-S004	S003	control	2	m	1	51.2894	0.215068	54	31	11	1	0	30	2	3	2	30	1
S003-S004	S003	control	2	m	1	33.2272	0.111127	54	31	11	1	0	31	2	3	2	40	1
S003-S004	S003	control	2	m	1	60.8484	0.19231	54	31	11	1	0	32	2	3	2	40	1
S003-S004	S003	control	2	m	1	58.2222	0.234387	54	31	11	1	0	33	2	3	2	40	1
S003-S004	S003	control	2	m	1	57.7184	0.232108	54	31	11	1	0	34	2	3	2	40	1
S003-S004	S003	control	2	m	1	38.9678	0.192351	54	31	11	1	0	35	2	3	2	40	1
S003-S004	S003	control	2	m	1	69.6634	0.276478	54	31	11	1	0	36	2	3	2	40	1
S003-S004	S003	control	2	m	1	65.37	0.311993	54	31	11	1	0	37	2	3	2	40	1
S003-S004	S003	control	2	m	1	70.5097	0.33216	54	31	11	1	0	38	2	3	2	40	1
S003-S004	S003	control	2	m	1	84.7348	0.358963	54	31	11	1	0	39	2	3	2	40	1
S003-S004	S003	control	2	m	1	55.7208	0.259927	54	31	11	1	0	40	2	3	2	40	1
S003-S004	S003	control	2	m	1	55.1403	0.211014	54	31	11	1	0	41	2	3	2	50	1
S003-S004	S003	control	2	m	1	63.5985	0.261565	54	31	11	1	0	42	2	3	2	50	1
S003-S004	S003	control	2	m	1	93.2817	0.361893	54	31	11	1	0	43	2	3	2	50	1
S003-S004	S003	control	2	m	1	132.988	0.594873	54	31	11	1	0	44	2	3	2	50	1
S003-S004	S003	control	2	m	1	152.18	0.846856	54	31	11	1	0	45	2	3	2	50	1
S003-S004	S003	control	2	m	1	142.591	0.779838	54	31	11	1	0	46	2	3	2	50	1
S003-S004	S003	control	2	m	1	116.749	0.535785	54	31	11	0	0	47	2	3	2	50	1
S003-S004	S003	control	2	m	1	80.8166	0.399604	54	31	11	0	0	48	2	3	2	50	1
S003-S004	S003	control	2	m	1	65.9991	0.288093	54	31	11	0	0	49	2	3	2	50	1
S003-S004	S003	control	2	m	1	72.1182	0.285391	54	31	11	0	0	50	2	3	2	50	1
S003-S004	S003	control	2	m	1	60.2649	0.29225	54	31	11	0	0	51	2	3	2	60	1
S003-S004	S003	control	2	m	1	64.4188	0.270765	54	31	11	0	0	52	2	3	2	60	1
S003-S004	S003	control	2	m	1	36.2943	0.10821	54	31	11	0	0	53	2	3	2	60	1
S003-S004	S003	control	2	m	1	54.2216	0.196755	54	31	11	0	0	54	2	3	2	60	1
S003-S004	S003	control	2	m	1	58.8335	0.153461	54	31	11	0	0	55	2	3	2	60	1
S003-S004	S003	control	2	m	1	52.2645	0.206956	54	31	11	0	0	56	2	3	2	60	1
S003-S004	S003	control	2	m	1	56.2469	0.221841	54	31	11	0	0	57	2	3	2	60	1
S003-S004	S003	control	2	m	1	84.346	0.320054	54	31	11	0	0	58	2	3	2	60	1
S003-S004	S003	control	2	m	1	119.562	0.486997	54	31	11	0	0	59	2	3	2	60	1
S003-S004	S003	control	2	m	2	191.312	0.642906	54	31	11	0	0	5	2	3	2	10	2
S003-S004	S003	control	2	m	2	174.69	0.538131	54	31	11	0	0	6	2	3	2	10	2
S003-S004	S003	control	2	m	2	198.913	0.618603	54	31	11	0	0	7	2	3	2	10	2
S003-S004	S003	control	2	m	2	174.601	0.583355	54	31	11	0	0	8	2	3	2	10	2
S003-S004	S003	control	2	m	2	135.537	0.44552	54	31	11	0	0	9	2	3	2	10	2
S003-S004	S003	control	2	m	2	139.601	0.430352	54	31	11	0	0	10	2	3	2	10	2
S003-S004	S003	control	2	m	2	141.239	0.438373	54	31	11	0	0	11	2	3	2	20	2
S003-S004	S003	control	2	m	2	155.448	0.555553	54	31	11	0	0	12	2	3	2	20	2
S003-S004	S003	control	2	m	2	198.783	0.784517	54	31	11	0	0	13	2	3	2	20	2
S003-S004	S003	control	2	m	2	225.805	0.985564	54	31	11	0	0	14	2	3	2	20	2
S003-S004	S003	control	2	m	2	240.968	1.39861	54	31	11	0	0	15	2	3	2	20	2
S003-S004	S003	control	2	m	2	209.925	1.28713	54	31	11	0	0	16	2	3	2	20	2
S003-S004	S003	control	2	m	2	139.861	0.58552	54	31	11	0	0	17	2	3	2	20	2
S003-S004	S003	control	2	m	2	106.697	0.265815	54	31	11	0	0	18	2	3	2	20	2
S003-S004	S003	control	2	m	2	95.829	0.199483	54	31	11	1	1	19	2	3	2	20	2
S003-S004	S003	control	2	m	2	97.1671	0.220333	54	31	11	1	0	20	2	3	2	20	2
S003-S004	S003	control	2	m	2	115.766	0.355201	54	31	11	1	0	21	2	3	2	30	2
S003-S004	S003	control	2	m	2	100.238	0.289949	54	31	11	1	0	22	2	3	2	30	2
S003-S004	S003	control	2	m	2	71.8254	0.238685	54	31	11	1	0	23	2	3	2	30	2
S003-S004	S003	control	2	m	2	82.9325	0.230132	54	31	11	1	0	24	2	3	2	30	2
S003-S004	S003	control	2	m	2	79.4641	0.264095	54	31	11	1	0	25	2	3	2	30	2
S003-S004	S003	control	2	m	2	87.1777	0.284882	54	31	11	1	0	26	2	3	2	30	2
S003-S004	S003	control	2	m	2	98.3284	0.360297	54	31	11	1	0	27	2	3	2	30	2
S003-S004	S003	control	2	m	2	116.699	0.412366	54	31	11	1	0	28	2	3	2	30	2
S003-S004	S003	control	2	m	2	139.236	0.600909	54	31	11	1	0	29	2	3	2	30	2
S003-S004	S003	control	2	m	2	111.549	0.418102	54	31	11	1	0	30	2	3	2	30	2
S003-S004	S003	control	2	m	2	97.5361	0.38512	54	31	11	1	0	31	2	3	2	40	2
S003-S004	S003	control	2	m	2	99.1574	0.389254	54	31	11	1	0	32	2	3	2	40	2
S003-S004	S003	control	2	m	2	96.6653	0.373694	54	31	11	1	0	33	2	3	2	40	2
S003-S004	S003	control	2	m	2	109.394	0.397394	54	31	11	1	0	34	2	3	2	40	2
S003-S004	S003	control	2	m	2	122.669	0.444449	54	31	11	1	0	35	2	3	2	40	2
S003-S004	S003	control	2	m	2	127.25	0.484021	54	31	11	1	0	36	2	3	2	40	2
S003-S004	S003	control	2	m	2	170.192	0.677079	54	31	11	1	0	37	2	3	2	40	2
S003-S004	S003	control	2	m	2	176.732	0.806602	54	31	11	1	0	38	2	3	2	40	2
S003-S004	S003	control	2	m	2	143.314	0.657157	54	31	11	1	0	39	2	3	2	40	2
S003-S004	S003	control	2	m	2	163.295	0.604711	54	31	11	0	0	40	2	3	2	40	2
S003-S004	S003	control	2	m	2	112.266	0.446146	54	31	11	0	0	41	2	3	2	50	2
S003-S004	S003	control	2	m	2	89.1429	0.229706	54	31	11	0	0	42	2	3	2	50	2
S003-S004	S003	control	2	m	2	81.6741	0.167934	54	31	11	0	0	43	2	3	2	50	2
S003-S004	S003	control	2	m	2	91.4665	0.181656	54	31	11	0	0	44	2	3	2	50	2
S003-S004	S003	control	2	m	2	129.007	0.284981	54	31	11	0	0	45	2	3	2	50	2
S003-S004	S003	control	2	m	2	114.018	0.365467	54	31	11	1	1	46	2	3	2	50	2
S003-S004	S003	control	2	m	2	89.3193	0.285016	54	31	11	1	0	47	2	3	2	50	2
S003-S004	S003	control	2	m	2	103.992	0.295504	54	31	11	1	0	48	2	3	2	50	2
S003-S004	S003	control	2	m	2	122.3	0.250441	54	31	11	1	0	49	2	3	2	50	2
S003-S004	S003	control	2	m	2	113.559	0.352952	54	31	11	1	0	50	2	3	2	50	2
S003-S004	S003	control	2	m	2	115.531	0.325815	54	31	11	1	0	51	2	3	2	60	2
S003-S004	S003	control	2	m	2	127.191	0.384581	54	31	11	1	0	52	2	3	2	60	2
S003-S004	S003	control	2	m	2	126.263	0.464695	54	31	11	1	0	53	2	3	2	60	2
S003-S004	S003	control	2	m	2	110.16	0.324008	54	31	11	1	0	54	2	3	2	60	2
S003-S004	S003	control	2	m	2	105.782	0.304895	54	31	11	1	0	55	2	3	2	60	2
S003-S004	S003	control	2	m	2	110.457	0.366323	54	31	11	1	0	56	2	3	2	60	2
S003-S004	S003	control	2	m	2	132.053	0.511313	54	31	11	1	0	57	2	3	2	60	2
S003-S004	S003	control	2	m	2	151.616	0.62897	54	31	11	1	0	58	2	3	2	60	2
S003-S004	S003	control	2	m	2	152.623	0.642034	54	31	11	1	0	59	2	3	2	60	2
S003-S004	S003	control	2	m	3	110.714	0.198938	54	31	11	0	0	5	2	3	2	10	3
S003-S004	S003	control	2	m	3	124.765	0.246313	54	31	11	0	0	6	2	3	2	10	3
S003-S004	S003	control	2	m	3	109.667	0.171975	54	31	11	0	0	7	2	3	2	10	3
S003-S004	S003	control	2	m	3	98.3866	0.181646	54	31	11	0	0	8	2	3	2	10	3
S003-S004	S003	control	2	m	3	95.6	0.211297	54	31	11	0	0	9	2	3	2	10	3
S003-S004	S003	control	2	m	3	87.7578	0.163426	54	31	11	0	0	10	2	3	2	10	3
S003-S004	S003	control	2	m	3	76.343	0.166206	54	31	11	0	0	11	2	3	2	20	3
S003-S004	S003	control	2	m	3	90.7694	0.185056	54	31	11	0	0	12	2	3	2	20	3
S003-S004	S003	control	2	m	3	75.6507	0.231386	54	31	11	0	0	13	2	3	2	20	3
S003-S004	S003	control	2	m	3	98.4142	0.143198	54	31	11	0	0	14	2	3	2	20	3
S003-S004	S003	control	2	m	3	91.3316	0.19207	54	31	11	0	0	15	2	3	2	20	3
S003-S004	S003	control	2	m	3	76.3914	0.126384	54	31	11	1	1	16	2	3	2	20	3
S003-S004	S003	control	2	m	3	71.3515	0.141439	54	31	11	1	0	17	2	3	2	20	3
S003-S004	S003	control	2	m	3	47.4127	0.126163	54	31	11	1	0	18	2	3	2	20	3
S003-S004	S003	control	2	m	3	102.889	0.172904	54	31	11	1	0	19	2	3	2	20	3
S003-S004	S003	control	2	m	3	88.6833	0.150458	54	31	11	1	0	20	2	3	2	20	3
S003-S004	S003	control	2	m	3	59.7631	0.114813	54	31	11	1	0	21	2	3	2	30	3
S003-S004	S003	control	2	m	3	76.6793	0.218029	54	31	11	1	0	22	2	3	2	30	3
S003-S004	S003	control	2	m	3	72.0343	0.186577	54	31	11	1	0	23	2	3	2	30	3
S003-S004	S003	control	2	m	3	72.3742	0.153398	54	31	11	1	0	24	2	3	2	30	3
S003-S004	S003	control	2	m	3	69.2515	0.156695	54	31	11	1	0	25	2	3	2	30	3
S003-S004	S003	control	2	m	3	46.8958	0.138576	54	31	11	1	0	26	2	3	2	30	3
S003-S004	S003	control	2	m	3	78.7339	0.149284	54	31	11	1	0	27	2	3	2	30	3
S003-S004	S003	control	2	m	3	103.492	0.231354	54	31	11	1	0	28	2	3	2	30	3
S003-S004	S003	control	2	m	3	115.168	0.208627	54	31	11	1	0	29	2	3	2	30	3
S003-S004	S003	control	2	m	3	95.595	0.281355	54	31	11	1	0	30	2	3	2	30	3
S003-S004	S003	control	2	m	3	88.7358	0.175879	54	31	11	1	0	31	2	3	2	40	3
S003-S004	S003	control	2	m	3	104.441	0.214385	54	31	11	1	0	32	2	3	2	40	3
S003-S004	S003	control	2	m	3	115.068	0.198915	54	31	11	1	0	33	2	3	2	40	3
S003-S004	S003	control	2	m	3	69.8075	0.179814	54	31	11	1	0	34	2	3	2	40	3
S003-S004	S003	control	2	m	3	41.8272	0.109759	54	31	11	1	0	35	2	3	2	40	3
S003-S004	S003	control	2	m	3	62.5873	0.138242	54	31	11	1	0	36	2	3	2	40	3
S003-S004	S003	control	2	m	3	89.9526	0.123096	54	31	11	1	0	37	2	3	2	40	3
S003-S004	S003	control	2	m	3	63.9587	0.12876	54	31	11	1	0	38	2	3	2	40	3
S003-S004	S003	control	2	m	3	79.283	0.224626	54	31	11	1	0	39	2	3	2	40	3
S003-S004	S003	control	2	m	3	82.1691	0.13318	54	31	11	1	0	40	2	3	2	40	3
S003-S004	S003	control	2	m	3	73.7593	0.17839	54	31	11	1	0	41	2	3	2	50	3
S003-S004	S003	control	2	m	3	61.3487	0.14221	54	31	11	1	0	42	2	3	2	50	3
S003-S004	S003	control	2	m	3	71.487	0.160117	54	31	11	1	0	43	2	3	2	50	3
S003-S004	S003	control	2	m	3	88.2392	0.152359	54	31	11	1	0	44	2	3	2	50	3
S003-S004	S003	control	2	m	3	71.9389	0.185285	54	31	11	1	0	45	2	3	2	50	3
S003-S004	S003	control	2	m	3	108.365	0.166183	54	31	11	1	0	46	2	3	2	50	3
S003-S004	S003	control	2	m	3	90.0072	0.183115	54	31	11	1	0	47	2	3	2	50	3
S003-S004	S003	control	2	m	3	80.156	0.183155	54	31	11	1	0	48	2	3	2	50	3
S003-S004	S003	control	2	m	3	86.0228	0.195152	54	31	11	1	0	49	2	3	2	50	3
S003-S004	S003	control	2	m	3	83.7201	0.124908	54	31	11	1	0	50	2	3	2	50	3
S003-S004	S003	control	2	m	3	61.7711	0.119239	54	31	11	1	0	51	2	3	2	60	3
S003-S004	S003	control	2	m	3	67.7791	0.118162	54	31	11	1	0	52	2	3	2	60	3
S003-S004	S003	control	2	m	3	60.4645	0.0986457	54	31	11	1	0	53	2	3	2	60	3
S003-S004	S003	control	2	m	3	75.2558	0.196201	54	31	11	1	0	54	2	3	2	60	3
S003-S004	S003	control	2	m	3	69.5763	0.191502	54	31	11	1	0	55	2	3	2	60	3
S003-S004	S003	control	2	m	3	70.3894	0.215953	54	31	11	1	0	56	2	3	2	60	3
S003-S004	S003	control	2	m	3	63.7547	0.104976	54	31	11	1	0	57	2	3	2	60	3
S003-S004	S003	control	2	m	3	58.9675	0.116836	54	31	11	1	0	58	2	3	2	60	3
S003-S004	S003	control	2	m	3	67.1475	0.130381	54	31	11	1	0	59	2	3	2	60	3
S003-S004	S003	control	2	m	4	119.338	0.191187	54	31	11	0	0	5	2	3	2	10	4
S003-S004	S003	control	2	m	4	118.799	0.151838	54	31	11	0	0	6	2	3	2	10	4
S003-S004	S003	control	2	m	4	97.448	0.116937	54	31	11	0	0	7	2	3	2	10	4
S003-S004	S003	control	2	m	4	97.7828	0.145038	54	31	11	0	0	8	2	3	2	10	4
S003-S004	S003	control	2	m	4	67.9326	0.166777	54	31	11	0	0	9	2	3	2	10	4
S003-S004	S003	control	2	m	4	56.2511	0.160767	54	31	11	0	0	10	2	3	2	10	4
S003-S004	S003	control	2	m	4	85.6022	0.192148	54	31	11	0	0	11	2	3	2	20	4
S003-S004	S003	control	2	m	4	91.142	0.183124	54	31	11	0	0	12	2	3	2	20	4
S003-S004	S003	control	2	m	4	79.0031	0.194229	54	31	11	0	0	13	2	3	2	20	4
S003-S004	S003	control	2	m	4	181.499	0.343447	54	31	11	0	0	14	2	3	2	20	4
S003-S004	S003	control	2	m	4	103.597	0.314586	54	31	11	0	0	15	2	3	2	20	4
S003-S004	S003	control	2	m	4	100.901	0.266779	54	31	11	0	0	16	2	3	2	20	4
S003-S004	S003	control	2	m	4	77.5835	0.206864	54	31	11	0	0	17	2	3	2	20	4
S003-S004	S003	control	2	m	4	69.148	0.213329	54	31	11	0	0	18	2	3	2	20	4
S003-S004	S003	control	2	m	4	54.742	0.173807	54	31	11	0	0	19	2	3	2	20	4
S003-S004	S003	control	2	m	4	65.6821	0.217194	54	31	11	0	0	20	2	3	2	20	4
S003-S004	S003	control	2	m	4	73.8746	0.167042	54	31	11	0	0	21	2	3	2	30	4
S003-S004	S003	control	2	m	4	74.8781	0.180664	54	31	11	0	0	22	2	3	2	30	4
S003-S004	S003	control	2	m	4	70.8871	0.223224	54	31	11	0	0	23	2	3	2	30	4
S003-S004	S003	control	2	m	4	66.363	0.175654	54	31	11	1	1	24	2	3	2	30	4
S003-S004	S003	control	2	m	4	60.1769	0.131327	54	31	11	1	0	25	2	3	2	30	4
S003-S004	S003	control	2	m	4	81.8162	0.239477	54	31	11	1	0	26	2	3	2	30	4
S003-S004	S003	control	2	m	4	121.365	0.257489	54	31	11	1	0	27	2	3	2	30	4
S003-S004	S003	control	2	m	4	101.299	0.301992	54	31	11	1	0	28	2	3	2	30	4
S003-S004	S003	control	2	m	4	106.146	0.226088	54	31	11	1	0	29	2	3	2	30	4
S003-S004	S003	control	2	m	4	151.918	0.333023	54	31	11	1	0	30	2	3	2	30	4
S003-S004	S003	control	2	m	4	119.27	0.26675	54	31	11	1	0	31	2	3	2	40	4
S003-S004	S003	control	2	m	4	66.5075	0.200504	54	31	11	1	0	32	2	3	2	40	4
S003-S004	S003	control	2	m	4	82.4542	0.167091	54	31	11	1	0	33	2	3	2	40	4
S003-S004	S003	control	2	m	4	92.9143	0.198956	54	31	11	1	0	34	2	3	2	40	4
S003-S004	S003	control	2	m	4	88.6462	0.172237	54	31	11	1	0	35	2	3	2	40	4
S003-S004	S003	control	2	m	4	71.6679	0.221945	54	31	11	1	0	36	2	3	2	40	4
S003-S004	S003	control	2	m	4	105.572	0.183283	54	31	11	1	0	37	2	3	2	40	4
S003-S004	S003	control	2	m	4	76.5416	0.126793	54	31	11	1	0	38	2	3	2	40	4
S003-S004	S003	control	2	m	4	93.3112	0.186513	54	31	11	1	0	39	2	3	2	40	4
S003-S004	S003	control	2	m	4	41.8124	0.171706	54	31	11	1	0	40	2	3	2	40	4
S003-S004	S003	control	2	m	4	100.796	0.189821	54	31	11	1	0	41	2	3	2	50	4
S003-S004	S003	control	2	m	4	87.7563	0.16862	54	31	11	1	0	42	2	3	2	50	4
S003-S004	S003	control	2	m	4	93.0089	0.186537	54	31	11	1	0	43	2	3	2	50	4
S003-S004	S003	control	2	m	4	61.5036	0.161055	54	31	11	1	0	44	2	3	2	50	4
S003-S004	S003	control	2	m	4	57.062	0.101268	54	31	11	1	0	45	2	3	2	50	4
S003-S004	S003	control	2	m	4	109.146	0.171716	54	31	11	1	0	46	2	3	2	50	4
S003-S004	S003	control	2	m	4	97.8912	0.240545	54	31	11	1	0	47	2	3	2	50	4
S003-S004	S003	control	2	m	4	76.5833	0.177167	54	31	11	1	0	48	2	3	2	50	4
S003-S004	S003	control	2	m	4	87.511	0.215514	54	31	11	1	0	49	2	3	2	50	4
S003-S004	S003	control	2	m	4	92.6361	0.17794	54	31	11	1	0	50	2	3	2	50	4
S003-S004	S003	control	2	m	4	93.3617	0.162261	54	31	11	1	0	51	2	3	2	60	4
S003-S004	S003	control	2	m	4	78.6034	0.220477	54	31	11	1	0	52	2	3	2	60	4
S003-S004	S003	control	2	m	4	75.7692	0.169807	54	31	11	1	0	53	2	3	2	60	4
S003-S004	S003	control	2	m	4	108.449	0.22427	54	31	11	1	0	54	2	3	2	60	4
S003-S004	S003	control	2	m	4	96.7293	0.214982	54	31	11	1	0	55	2	3	2	60	4
S003-S004	S003	control	2	m	4	107.683	0.277372	54	31	11	1	0	56	2	3	2	60	4
S003-S004	S003	control	2	m	4	96.2369	0.191949	54	31	11	1	0	57	2	3	2	60	4
S003-S004	S003	control	2	m	4	113.762	0.225356	54	31	11	1	0	58	2	3	2	60	4
S003-S004	S003	control	2	m	4	107.219	0.215327	54	31	11	1	0	59	2	3	2	60	4
S003-S004	S003	control	2	m	5	74.6963	0.244289	54	31	11	0	0	5	2	3	2	10	5
S003-S004	S003	control	2	m	5	64.742	0.19614	54	31	11	0	0	6	2	3	2	10	5
S003-S004	S003	control	2	m	5	93.6877	0.310187	54	31	11	0	0	7	2	3	2	10	5
S003-S004	S003	control	2	m	5	90.5381	0.303762	54	31	11	0	0	8	2	3	2	10	5
S003-S004	S003	control	2	m	5	78.4674	0.272061	54	31	11	0	0	9	2	3	2	10	5
S003-S004	S003	control	2	m	5	74.3333	0.275776	54	31	11	0	0	10	2	3	2	10	5
S003-S004	S003	control	2	m	5	83.2068	0.300642	54	31	11	0	0	11	2	3	2	20	5
S003-S004	S003	control	2	m	5	118.065	0.417513	54	31	11	0	0	12	2	3	2	20	5
S003-S004	S003	control	2	m	5	118.039	0.449897	54	31	11	0	0	13	2	3	2	20	5
S003-S004	S003	control	2	m	5	95.093	0.340027	54	31	11	0	0	14	2	3	2	20	5
S003-S004	S003	control	2	m	5	67.9182	0.268968	54	31	11	0	0	15	2	3	2	20	5
S003-S004	S003	control	2	m	5	74.8573	0.278437	54	31	11	0	0	16	2	3	2	20	5
S003-S004	S003	control	2	m	5	75.0337	0.235134	54	31	11	0	0	17	2	3	2	20	5
S003-S004	S003	control	2	m	5	95.8412	0.356068	54	31	11	0	0	18	2	3	2	20	5
S003-S004	S003	control	2	m	5	113.913	0.50773	54	31	11	0	0	19	2	3	2	20	5
S003-S004	S003	control	2	m	5	112.274	0.535458	54	31	11	0	0	20	2	3	2	20	5
S003-S004	S003	control	2	m	5	118.679	0.523087	54	31	11	0	0	21	2	3	2	30	5
S003-S004	S003	control	2	m	5	124.106	0.571279	54	31	11	0	0	22	2	3	2	30	5
S003-S004	S003	control	2	m	5	148.31	0.735176	54	31	11	0	0	23	2	3	2	30	5
S003-S004	S003	control	2	m	5	113.426	0.586448	54	31	11	0	0	24	2	3	2	30	5
S003-S004	S003	control	2	m	5	94.5247	0.446663	54	31	11	0	0	25	2	3	2	30	5
S003-S004	S003	control	2	m	5	68.0969	0.247327	54	31	11	0	0	26	2	3	2	30	5
S003-S004	S003	control	2	m	5	45.0825	0.140191	54	31	11	1	1	27	2	3	2	30	5
S003-S004	S003	control	2	m	5	54.5329	0.191021	54	31	11	1	0	28	2	3	2	30	5
S003-S004	S003	control	2	m	5	70.5095	0.283497	54	31	11	1	0	29	2	3	2	30	5
S003-S004	S003	control	2	m	5	65.4974	0.223039	54	31	11	1	0	30	2	3	2	30	5
S003-S004	S003	control	2	m	5	84.7061	0.290706	54	31	11	1	0	31	2	3	2	40	5
S003-S004	S003	control	2	m	5	103.276	0.38907	54	31	11	1	0	32	2	3	2	40	5
S003-S004	S003	control	2	m	5	63.7289	0.247249	54	31	11	1	0	33	2	3	2	40	5
S003-S004	S003	control	2	m	5	51.8516	0.202003	54	31	11	1	0	34	2	3	2	40	5
S003-S004	S003	control	2	m	5	61.8388	0.211815	54	31	11	1	0	35	2	3	2	40	5
S003-S004	S003	control	2	m	5	54.1854	0.145007	54	31	11	1	0	36	2	3	2	40	5
S003-S004	S003	control	2	m	5	75.1324	0.294649	54	31	11	1	0	37	2	3	2	40	5
S003-S004	S003	control	2	m	5	53.365	0.14763	54	31	11	1	0	38	2	3	2	40	5
S003-S004	S003	control	2	m	5	55.1606	0.119808	54	31	11	1	0	39	2	3	2	40	5
S003-S004	S003	control	2	m	5	48.9028	0.115522	54	31	11	1	0	40	2	3	2	40	5
S003-S004	S003	control	2	m	5	88.5536	0.356317	54	31	11	1	0	41	2	3	2	50	5
S003-S004	S003	control	2	m	5	113.548	0.47341	54	31	11	1	0	42	2	3	2	50	5
S003-S004	S003	control	2	m	5	96.8865	0.347738	54	31	11	1	0	43	2	3	2	50	5
S003-S004	S003	control	2	m	5	69.2542	0.161593	54	31	11	1	0	44	2	3	2	50	5
S003-S004	S003	control	2	m	5	55.9198	0.232171	54	31	11	1	0	45	2	3	2	50	5
S003-S004	S003	control	2	m	5	88.0819	0.395383	54	31	11	1	0	46	2	3	2	50	5
S003-S004	S003	control	2	m	5	112.585	0.50378	54	31	11	1	0	47	2	3	2	50	5
S003-S004	S003	control	2	m	5	74.1561	0.33483	54	31	11	1	0	48	2	3	2	50	5
S003-S004	S003	control	2	m	5	65.3124	0.256579	54	31	11	1	0	49	2	3	2	50	5
S003-S004	S003	control	2	m	5	63.2694	0.233394	54	31	11	1	0	50	2	3	2	50	5
S003-S004	S003	control	2	m	5	83.2205	0.315876	54	31	11	1	0	51	2	3	2	60	5
S003-S004	S003	control	2	m	5	143.612	0.731175	54	31	11	1	0	52	2	3	2	60	5
S003-S004	S003	control	2	m	5	185.435	0.432599	54	31	11	1	0	53	2	3	2	60	5
S003-S004	S003	control	2	m	5	179.355	0.459112	54	31	11	0	0	54	2	3	2	60	5
S003-S004	S003	control	2	m	5	147.289	0.656856	54	31	11	0	0	55	2	3	2	60	5
S003-S004	S003	control	2	m	5	92.9535	0.299765	54	31	11	0	0	56	2	3	2	60	5
S003-S004	S003	control	2	m	5	129.469	0.507945	54	31	11	0	0	57	2	3	2	60	5
S003-S004	S003	control	2	m	5	169.468	0.563725	54	31	11	0	0	58	2	3	2	60	5
S003-S004	S003	control	2	m	5	186.845	0.205459	54	31	11	0	0	59	2	3	2	60	5
S003-S004	S003	control	2	m	6	86.8884	0.352	54	31	11	0	0	5	2	3	2	10	6
S003-S004	S003	control	2	m	6	49.5203	0.171493	54	31	11	0	0	6	2	3	2	10	6
S003-S004	S003	control	2	m	6	43.1151	0.143262	54	31	11	0	0	7	2	3	2	10	6
S003-S004	S003	control	2	m	6	45.2085	0.15726	54	31	11	0	0	8	2	3	2	10	6
S003-S004	S003	control	2	m	6	46.3023	0.150119	54	31	11	0	0	9	2	3	2	10	6
S003-S004	S003	control	2	m	6	67.1685	0.195972	54	31	11	0	0	10	2	3	2	10	6
S003-S004	S003	control	2	m	6	60.1249	0.172747	54	31	11	0	0	11	2	3	2	20	6
S003-S004	S003	control	2	m	6	44.7706	0.133267	54	31	11	0	0	12	2	3	2	20	6
S003-S004	S003	control	2	m	6	42.6554	0.133791	54	31	11	0	0	13	2	3	2	20	6
S003-S004	S003	control	2	m	6	47.4387	0.147898	54	31	11	0	0	14	2	3	2	20	6
S003-S004	S003	control	2	m	6	60.5146	0.218627	54	31	11	0	0	15	2	3	2	20	6
S003-S004	S003	control	2	m	6	61.7546	0.169093	54	31	11	0	0	16	2	3	2	20	6
S003-S004	S003	control	2	m	6	57.7371	0.169772	54	31	11	1	1	17	2	3	2	20	6
S003-S004	S003	control	2	m	6	59.0406	0.249869	54	31	11	1	0	18	2	3	2	20	6
S003-S004	S003	control	2	m	6	43.2763	0.128444	54	31	11	1	0	19	2	3	2	20	6
S003-S004	S003	control	2	m	6	50.0718	0.163419	54	31	11	1	0	20	2	3	2	20	6
S003-S004	S003	control	2	m	6	65.132	0.170648	54	31	11	1	0	21	2	3	2	30	6
S003-S004	S003	control	2	m	6	72.3848	0.205649	54	31	11	1	0	22	2	3	2	30	6
S003-S004	S003	control	2	m	6	39.1633	0.149634	54	31	11	1	0	23	2	3	2	30	6
S003-S004	S003	control	2	m	6	52.262	0.170851	54	31	11	1	0	24	2	3	2	30	6
S003-S004	S003	control	2	m	6	53.8928	0.189899	54	31	11	1	0	25	2	3	2	30	6
S003-S004	S003	control	2	m	6	50.0488	0.162493	54	31	11	1	0	26	2	3	2	30	6
S003-S004	S003	control	2	m	6	53.759	0.134743	54	31	11	1	0	27	2	3	2	30	6
S003-S004	S003	control	2	m	6	43.7163	0.130896	54	31	11	1	0	28	2	3	2	30	6
S003-S004	S003	control	2	m	6	35.0111	0.110343	54	31	11	1	0	29	2	3	2	30	6
S003-S004	S003	control	2	m	6	37.7165	0.147297	54	31	11	1	0	30	2	3	2	30	6
S003-S004	S003	control	2	m	6	50.7483	0.175576	54	31	11	1	0	31	2	3	2	40	6
S003-S004	S003	control	2	m	6	46.5811	0.172659	54	31	11	1	0	32	2	3	2	40	6
S003-S004	S003	control	2	m	6	60.9392	0.188133	54	31	11	1	0	33	2	3	2	40	6
S003-S004	S003	control	2	m	6	47.8913	0.193425	54	31	11	1	0	34	2	3	2	40	6
S003-S004	S003	control	2	m	6	43.956	0.143	54	31	11	1	0	35	2	3	2	40	6
S003-S004	S003	control	2	m	6	48.2813	0.163607	54	31	11	1	0	36	2	3	2	40	6
S003-S004	S003	control	2	m	6	48.6031	0.1665	54	31	11	1	0	37	2	3	2	40	6
S003-S004	S003	control	2	m	6	46.0018	0.178052	54	31	11	1	0	38	2	3	2	40	6
S003-S004	S003	control	2	m	6	54.8479	0.119418	54	31	11	1	0	39	2	3	2	40	6
S003-S004	S003	control	2	m	6	47.7723	0.194691	54	31	11	1	0	40	2	3	2	40	6
S003-S004	S003	control	2	m	6	47.4163	0.207604	54	31	11	1	0	41	2	3	2	50	6
S003-S004	S003	control	2	m	6	56.7963	0.210551	54	31	11	1	0	42	2	3	2	50	6
S003-S004	S003	control	2	m	6	53.3861	0.14384	54	31	11	1	0	43	2	3	2	50	6
S003-S004	S003	control	2	m	6	48.0468	0.182913	54	31	11	1	0	44	2	3	2	50	6
S003-S004	S003	control	2	m	6	58.0268	0.147138	54	31	11	1	0	45	2	3	2	50	6
S003-S004	S003	control	2	m	6	62.5211	0.194339	54	31	11	1	0	46	2	3	2	50	6
S003-S004	S003	control	2	m	6	68.466	0.160098	54	31	11	1	0	47	2	3	2	50	6
S003-S004	S003	control	2	m	6	54.8742	0.115753	54	31	11	1	0	48	2	3	2	50	6
S003-S004	S003	control	2	m	6	59.9383	0.126073	54	31	11	1	0	49	2	3	2	50	6
S003-S004	S003	control	2	m	6	79.9634	0.187955	54	31	11	1	0	50	2	3	2	50	6
S003-S004	S003	control	2	m	6	50.755	0.167108	54	31	11	1	0	51	2	3	2	60	6
S003-S004	S003	control	2	m	6	53.5468	0.137831	54	31	11	1	0	52	2	3	2	60	6
S003-S004	S003	control	2	m	6	59.0952	0.150378	54	31	11	1	0	53	2	3	2	60	6
S003-S004	S003	control	2	m	6	105.176	0.30464	54	31	11	1	0	54	2	3	2	60	6
S003-S004	S003	control	2	m	6	90.0106	0.202675	54	31	11	1	0	55	2	3	2	60	6
S003-S004	S003	control	2	m	6	82.8002	0.195553	54	31	11	1	0	56	2	3	2	60	6
S003-S004	S003	control	2	m	6	97.9337	0.179317	54	31	11	1	0	57	2	3	2	60	6
S003-S004	S003	control	2	m	6	75.1507	0.185325	54	31	11	1	0	58	2	3	2	60	6
S003-S004	S003	control	2	m	6	44.7128	0.12008	54	31	11	1	0	59	2	3	2	60	6
S003-S004	S004	control	2	f	1	71.8625	0.273298	67	32	10	0	0	5	2	4	1	10	1
S003-S004	S004	control	2	f	1	96.4195	0.345063	67	32	10	0	0	6	2	4	1	10	1
S003-S004	S004	control	2	f	1	90.9067	0.404199	67	32	10	0	0	7	2	4	1	10	1
S003-S004	S004	control	2	f	1	103.311	0.424408	67	32	10	0	0	8	2	4	1	10	1
S003-S004	S004	control	2	f	1	130.873	0.578061	67	32	10	0	0	9	2	4	1	10	1
S003-S004	S004	control	2	f	1	122.807	0.572979	67	32	10	0	0	10	2	4	1	10	1
S003-S004	S004	control	2	f	1	79.1614	0.356927	67	32	10	0	0	11	2	4	1	20	1
S003-S004	S004	control	2	f	1	62.9637	0.306721	67	32	10	0	0	12	2	4	1	20	1
S003-S004	S004	control	2	f	1	49.3398	0.210512	67	32	10	0	0	13	2	4	1	20	1
S003-S004	S004	control	2	f	1	130.22	0.610854	67	32	10	1	1	14	2	4	1	20	1
S003-S004	S004	control	2	f	1	117.637	0.646547	67	32	10	1	0	15	2	4	1	20	1
S003-S004	S004	control	2	f	1	65.0569	0.341319	67	32	10	1	0	16	2	4	1	20	1
S003-S004	S004	control	2	f	1	91.8199	0.339631	67	32	10	1	0	17	2	4	1	20	1
S003-S004	S004	control	2	f	1	96.866	0.505194	67	32	10	1	0	18	2	4	1	20	1
S003-S004	S004	control	2	f	1	90.5972	0.394317	67	32	10	1	0	19	2	4	1	20	1
S003-S004	S004	control	2	f	1	55.7198	0.209193	67	32	10	1	0	20	2	4	1	20	1
S003-S004	S004	control	2	f	1	59.8629	0.240878	67	32	10	1	0	21	2	4	1	30	1
S003-S004	S004	control	2	f	1	68.4513	0.303348	67	32	10	1	0	22	2	4	1	30	1
S003-S004	S004	control	2	f	1	46.9156	0.165017	67	32	10	1	0	23	2	4	1	30	1
S003-S004	S004	control	2	f	1	40.9915	0.184298	67	32	10	1	0	24	2	4	1	30	1
S003-S004	S004	control	2	f	1	55.6229	0.224358	67	32	10	1	0	25	2	4	1	30	1
S003-S004	S004	control	2	f	1	59.5747	0.224875	67	32	10	1	0	26	2	4	1	30	1
S003-S004	S004	control	2	f	1	42.748	0.179845	67	32	10	1	0	27	2	4	1	30	1
S003-S004	S004	control	2	f	1	53.8923	0.247507	67	32	10	1	0	28	2	4	1	30	1
S003-S004	S004	control	2	f	1	49.3072	0.229016	67	32	10	1	0	29	2	4	1	30	1
S003-S004	S004	control	2	f	1	51.2894	0.215068	67	32	10	1	0	30	2	4	1	30	1
S003-S004	S004	control	2	f	1	33.2272	0.111127	67	32	10	1	0	31	2	4	1	40	1
S003-S004	S004	control	2	f	1	60.8484	0.19231	67	32	10	1	0	32	2	4	1	40	1
S003-S004	S004	control	2	f	1	58.2222	0.234387	67	32	10	1	0	33	2	4	1	40	1
S003-S004	S004	control	2	f	1	57.7184	0.232108	67	32	10	1	0	34	2	4	1	40	1
S003-S004	S004	control	2	f	1	38.9678	0.192351	67	32	10	1	0	35	2	4	1	40	1
S003-S004	S004	control	2	f	1	69.6634	0.276478	67	32	10	1	0	36	2	4	1	40	1
S003-S004	S004	control	2	f	1	65.37	0.311993	67	32	10	1	0	37	2	4	1	40	1
S003-S004	S004	control	2	f	1	70.5097	0.33216	67	32	10	1	0	38	2	4	1	40	1
S003-S004	S004	control	2	f	1	84.7348	0.358963	67	32	10	1	0	39	2	4	1	40	1
S003-S004	S004	control	2	f	1	55.7208	0.259927	67	32	10	1	0	40	2	4	1	40	1
S003-S004	S004	control	2	f	1	55.1403	0.211014	67	32	10	1	0	41	2	4	1	50	1
S003-S004	S004	control	2	f	1	63.5985	0.261565	67	32	10	1	0	42	2	4	1	50	1
S003-S004	S004	control	2	f	1	93.2817	0.361893	67	32	10	1	0	43	2	4	1	50	1
S003-S004	S004	control	2	f	1	132.988	0.594873	67	32	10	1	0	44	2	4	1	50	1
S003-S004	S004	control	2	f	1	152.18	0.846856	67	32	10	0	0	45	2	4	1	50	1
S003-S004	S004	control	2	f	1	142.591	0.779838	67	32	10	0	0	46	2	4	1	50	1
S003-S004	S004	control	2	f	1	116.749	0.535785	67	32	10	0	0	47	2	4	1	50	1
S003-S004	S004	control	2	f	1	80.8166	0.399604	67	32	10	0	0	48	2	4	1	50	1
S003-S004	S004	control	2	f	1	65.9991	0.288093	67	32	10	0	0	49	2	4	1	50	1
S003-S004	S004	control	2	f	1	72.1182	0.285391	67	32	10	0	0	50	2	4	1	50	1
S003-S004	S004	control	2	f	1	60.2649	0.29225	67	32	10	0	0	51	2	4	1	60	1
S003-S004	S004	control	2	f	1	64.4188	0.270765	67	32	10	0	0	52	2	4	1	60	1
S003-S004	S004	control	2	f	1	36.2943	0.10821	67	32	10	0	0	53	2	4	1	60	1
S003-S004	S004	control	2	f	1	54.2216	0.196755	67	32	10	0	0	54	2	4	1	60	1
S003-S004	S004	control	2	f	1	58.8335	0.153461	67	32	10	0	0	55	2	4	1	60	1
S003-S004	S004	control	2	f	1	52.2645	0.206956	67	32	10	0	0	56	2	4	1	60	1
S003-S004	S004	control	2	f	1	56.2469	0.221841	67	32	10	0	0	57	2	4	1	60	1
S003-S004	S004	control	2	f	1	84.346	0.320054	67	32	10	0	0	58	2	4	1	60	1
S003-S004	S004	control	2	f	1	119.562	0.486997	67	32	10	0	0	59	2	4	1	60	1
S003-S004	S004	control	2	f	2	191.312	0.642906	67	32	10	0	0	5	2	4	1	10	2
S003-S004	S004	control	2	f	2	174.69	0.538131	67	32	10	0	0	6	2	4	1	10	2
S003-S004	S004	control	2	f	2	198.913	0.618603	67	32	10	0	0	7	2	4	1	10	2
S003-S004	S004	control	2	f	2	174.601	0.583355	67	32	10	0	0	8	2	4	1	10	2
S003-S004	S004	control	2	f	2	135.537	0.44552	67	32	10	0	0	9	2	4	1	10	2
S003-S004	S004	control	2	f	2	139.601	0.430352	67	32	10	0	0	10	2	4	1	10	2
S003-S004	S004	control	2	f	2	141.239	0.438373	67	32	10	0	0	11	2	4	1	20	2
S003-S004	S004	control	2	f	2	155.448	0.555553	67	32	10	0	0	12	2	4	1	20	2
S003-S004	S004	control	2	f	2	198.783	0.784517	67	32	10	0	0	13	2	4	1	20	2
S003-S004	S004	control	2	f	2	225.805	0.985564	67	32	10	0	0	14	2	4	1	20	2
S003-S004	S004	control	2	f	2	240.968	1.39861	67	32	10	0	0	15	2	4	1	20	2
S003-S004	S004	control	2	f	2	209.925	1.28713	67	32	10	1	1	16	2	4	1	20	2
S003-S004	S004	control	2	f	2	139.861	0.58552	67	32	10	1	0	17	2	4	1	20	2
S003-S004	S004	control	2	f	2	106.697	0.265815	67	32	10	1	0	18	2	4	1	20	2
S003-S004	S004	control	2	f	2	95.829	0.199483	67	32	10	1	0	19	2	4	1	20	2
S003-S004	S004	control	2	f	2	97.1671	0.220333	67	32	10	1	0	20	2	4	1	20	2
S003-S004	S004	control	2	f	2	115.766	0.355201	67	32	10	1	0	21	2	4	1	30	2
S003-S004	S004	control	2	f	2	100.238	0.289949	67	32	10	1	0	22	2	4	1	30	2
S003-S004	S004	control	2	f	2	71.8254	0.238685	67	32	10	1	0	23	2	4	1	30	2
S003-S004	S004	control	2	f	2	82.9325	0.230132	67	32	10	1	0	24	2	4	1	30	2
S003-S004	S004	control	2	f	2	79.4641	0.264095	67	32	10	1	0	25	2	4	1	30	2
S003-S004	S004	control	2	f	2	87.1777	0.284882	67	32	10	1	0	26	2	4	1	30	2
S003-S004	S004	control	2	f	2	98.3284	0.360297	67	32	10	1	0	27	2	4	1	30	2
S003-S004	S004	control	2	f	2	116.699	0.412366	67	32	10	1	0	28	2	4	1	30	2
S003-S004	S004	control	2	f	2	139.236	0.600909	67	32	10	1	0	29	2	4	1	30	2
S003-S004	S004	control	2	f	2	111.549	0.418102	67	32	10	1	0	30	2	4	1	30	2
S003-S004	S004	control	2	f	2	97.5361	0.38512	67	32	10	1	0	31	2	4	1	40	2
S003-S004	S004	control	2	f	2	99.1574	0.389254	67	32	10	1	0	32	2	4	1	40	2
S003-S004	S004	control	2	f	2	96.6653	0.373694	67	32	10	1	0	33	2	4	1	40	2
S003-S004	S004	control	2	f	2	109.394	0.397394	67	32	10	1	0	34	2	4	1	40	2
S003-S004	S004	control	2	f	2	122.669	0.444449	67	32	10	1	0	35	2	4	1	40	2
S003-S004	S004	control	2	f	2	127.25	0.484021	67	32	10	1	0	36	2	4	1	40	2
S003-S004	S004	control	2	f	2	170.192	0.677079	67	32	10	1	0	37	2	4	1	40	2
S003-S004	S004	control	2	f	2	176.732	0.806602	67	32	10	0	0	38	2	4	1	40	2
S003-S004	S004	control	2	f	2	143.314	0.657157	67	32	10	0	0	39	2	4	1	40	2
S003-S004	S004	control	2	f	2	163.295	0.604711	67	32	10	0	0	40	2	4	1	40	2
S003-S004	S004	control	2	f	2	112.266	0.446146	67	32	10	0	0	41	2	4	1	50	2
S003-S004	S004	control	2	f	2	89.1429	0.229706	67	32	10	0	0	42	2	4	1	50	2
S003-S004	S004	control	2	f	2	81.6741	0.167934	67	32	10	0	0	43	2	4	1	50	2
S003-S004	S004	control	2	f	2	91.4665	0.181656	67	32	10	0	0	44	2	4	1	50	2
S003-S004	S004	control	2	f	2	129.007	0.284981	67	32	10	0	0	45	2	4	1	50	2
S003-S004	S004	control	2	f	2	114.018	0.365467	67	32	10	0	0	46	2	4	1	50	2
S003-S004	S004	control	2	f	2	89.3193	0.285016	67	32	10	0	0	47	2	4	1	50	2
S003-S004	S004	control	2	f	2	103.992	0.295504	67	32	10	0	0	48	2	4	1	50	2
S003-S004	S004	control	2	f	2	122.3	0.250441	67	32	10	0	0	49	2	4	1	50	2
S003-S004	S004	control	2	f	2	113.559	0.352952	67	32	10	0	0	50	2	4	1	50	2
S003-S004	S004	control	2	f	2	115.531	0.325815	67	32	10	0	0	51	2	4	1	60	2
S003-S004	S004	control	2	f	2	127.191	0.384581	67	32	10	0	0	52	2	4	1	60	2
S003-S004	S004	control	2	f	2	126.263	0.464695	67	32	10	0	0	53	2	4	1	60	2
S003-S004	S004	control	2	f	2	110.16	0.324008	67	32	10	0	0	54	2	4	1	60	2
S003-S004	S004	control	2	f	2	105.782	0.304895	67	32	10	0	0	55	2	4	1	60	2
S003-S004	S004	control	2	f	2	110.457	0.366323	67	32	10	0	0	56	2	4	1	60	2
S003-S004	S004	control	2	f	2	132.053	0.511313	67	32	10	0	0	57	2	4	1	60	2
S003-S004	S004	control	2	f	2	151.616	0.62897	67	32	10	0	0	58	2	4	1	60	2
S003-S004	S004	control	2	f	2	152.623	0.642034	67	32	10	0	0	59	2	4	1	60	2
S003-S004	S004	control	2	f	3	110.714	0.198938	67	32	10	0	0	5	2	4	1	10	3
S003-S004	S004	control	2	f	3	124.765	0.246313	67	32	10	0	0	6	2	4	1	10	3
S003-S004	S004	control	2	f	3	109.667	0.171975	67	32	10	0	0	7	2	4	1	10	3
S003-S004	S004	control	2	f	3	98.3866	0.181646	67	32	10	0	0	8	2	4	1	10	3
S003-S004	S004	control	2	f	3	95.6	0.211297	67	32	10	0	0	9	2	4	1	10	3
S003-S004	S004	control	2	f	3	87.7578	0.163426	67	32	10	0	0	10	2	4	1	10	3
S003-S004	S004	control	2	f	3	76.343	0.166206	67	32	10	0	0	11	2	4	1	20	3
S003-S004	S004	control	2	f	3	90.7694	0.185056	67	32	10	0	0	12	2	4	1	20	3
S003-S004	S004	control	2	f	3	75.6507	0.231386	67	32	10	0	0	13	2	4	1	20	3
S003-S004	S004	control	2	f	3	98.4142	0.143198	67	32	10	0	0	14	2	4	1	20	3
S003-S004	S004	control	2	f	3	91.3316	0.19207	67	32	10	1	1	15	2	4	1	20	3
S003-S004	S004	control	2	f	3	76.3914	0.126384	67	32	10	1	0	16	2	4	1	20	3
S003-S004	S004	control	2	f	3	71.3515	0.141439	67	32	10	1	0	17	2	4	1	20	3
S003-S004	S004	control	2	f	3	47.4127	0.126163	67	32	10	1	0	18	2	4	1	20	3
S003-S004	S004	control	2	f	3	102.889	0.172904	67	32	10	1	0	19	2	4	1	20	3
S003-S004	S004	control	2	f	3	88.6833	0.150458	67	32	10	1	0	20	2	4	1	20	3
S003-S004	S004	control	2	f	3	59.7631	0.114813	67	32	10	1	0	21	2	4	1	30	3
S003-S004	S004	control	2	f	3	76.6793	0.218029	67	32	10	1	0	22	2	4	1	30	3
S003-S004	S004	control	2	f	3	72.0343	0.186577	67	32	10	1	0	23	2	4	1	30	3
S003-S004	S004	control	2	f	3	72.3742	0.153398	67	32	10	1	0	24	2	4	1	30	3
S003-S004	S004	control	2	f	3	69.2515	0.156695	67	32	10	1	0	25	2	4	1	30	3
S003-S004	S004	control	2	f	3	46.8958	0.138576	67	32	10	1	0	26	2	4	1	30	3
S003-S004	S004	control	2	f	3	78.7339	0.149284	67	32	10	1	0	27	2	4	1	30	3
S003-S004	S004	control	2	f	3	103.492	0.231354	67	32	10	1	0	28	2	4	1	30	3
S003-S004	S004	control	2	f	3	115.168	0.208627	67	32	10	1	0	29	2	4	1	30	3
S003-S004	S004	control	2	f	3	95.595	0.281355	67	32	10	1	0	30	2	4	1	30	3
S003-S004	S004	control	2	f	3	88.7358	0.175879	67	32	10	1	0	31	2	4	1	40	3
S003-S004	S004	control	2	f	3	104.441	0.214385	67	32	10	1	0	32	2	4	1	40	3
S003-S004	S004	control	2	f	3	115.068	0.198915	67	32	10	1	0	33	2	4	1	40	3
S003-S004	S004	control	2	f	3	69.8075	0.179814	67	32	10	1	0	34	2	4	1	40	3
S003-S004	S004	control	2	f	3	41.8272	0.109759	67	32	10	1	0	35	2	4	1	40	3
S003-S004	S004	control	2	f	3	62.5873	0.138242	67	32	10	1	0	36	2	4	1	40	3
S003-S004	S004	control	2	f	3	89.9526	0.123096	67	32	10	1	0	37	2	4	1	40	3
S003-S004	S004	control	2	f	3	63.9587	0.12876	67	32	10	1	0	38	2	4	1	40	3
S003-S004	S004	control	2	f	3	79.283	0.224626	67	32	10	1	0	39	2	4	1	40	3
S003-S004	S004	control	2	f	3	82.1691	0.13318	67	32	10	1	0	40	2	4	1	40	3
S003-S004	S004	control	2	f	3	73.7593	0.17839	67	32	10	1	0	41	2	4	1	50	3
S003-S004	S004	control	2	f	3	61.3487	0.14221	67	32	10	1	0	42	2	4	1	50	3
S003-S004	S004	control	2	f	3	71.487	0.160117	67	32	10	1	0	43	2	4	1	50	3
S003-S004	S004	control	2	f	3	88.2392	0.152359	67	32	10	1	0	44	2	4	1	50	3
S003-S004	S004	control	2	f	3	71.9389	0.185285	67	32	10	0	0	45	2	4	1	50	3
S003-S004	S004	control	2	f	3	108.365	0.166183	67	32	10	0	0	46	2	4	1	50	3
S003-S004	S004	control	2	f	3	90.0072	0.183115	67	32	10	0	0	47	2	4	1	50	3
S003-S004	S004	control	2	f	3	80.156	0.183155	67	32	10	0	0	48	2	4	1	50	3
S003-S004	S004	control	2	f	3	86.0228	0.195152	67	32	10	0	0	49	2	4	1	50	3
S003-S004	S004	control	2	f	3	83.7201	0.124908	67	32	10	0	0	50	2	4	1	50	3
S003-S004	S004	control	2	f	3	61.7711	0.119239	67	32	10	0	0	51	2	4	1	60	3
S003-S004	S004	control	2	f	3	67.7791	0.118162	67	32	10	0	0	52	2	4	1	60	3
S003-S004	S004	control	2	f	3	60.4645	0.0986457	67	32	10	0	0	53	2	4	1	60	3
S003-S004	S004	control	2	f	3	75.2558	0.196201	67	32	10	0	0	54	2	4	1	60	3
S003-S004	S004	control	2	f	3	69.5763	0.191502	67	32	10	0	0	55	2	4	1	60	3
S003-S004	S004	control	2	f	3	70.3894	0.215953	67	32	10	0	0	56	2	4	1	60	3
S003-S004	S004	control	2	f	3	63.7547	0.104976	67	32	10	0	0	57	2	4	1	60	3
S003-S004	S004	control	2	f	3	58.9675	0.116836	67	32	10	0	0	58	2	4	1	60	3
S003-S004	S004	control	2	f	3	67.1475	0.130381	67	32	10	0	0	59	2	4	1	60	3
S003-S004	S004	control	2	f	4	119.338	0.191187	67	32	10	0	0	5	2	4	1	10	4
S003-S004	S004	control	2	f	4	118.799	0.151838	67	32	10	0	0	6	2	4	1	10	4
S003-S004	S004	control	2	f	4	97.448	0.116937	67	32	10	0	0	7	2	4	1	10	4
S003-S004	S004	control	2	f	4	97.7828	0.145038	67	32	10	0	0	8	2	4	1	10	4
S003-S004	S004	control	2	f	4	67.9326	0.166777	67	32	10	0	0	9	2	4	1	10	4
S003-S004	S004	control	2	f	4	56.2511	0.160767	67	32	10	0	0	10	2	4	1	10	4
S003-S004	S004	control	2	f	4	85.6022	0.192148	67	32	10	0	0	11	2	4	1	20	4
S003-S004	S004	control	2	f	4	91.142	0.183124	67	32	10	0	0	12	2	4	1	20	4
S003-S004	S004	control	2	f	4	79.0031	0.194229	67	32	10	0	0	13	2	4	1	20	4
S003-S004	S004	control	2	f	4	181.499	0.343447	67	32	10	0	0	14	2	4	1	20	4
S003-S004	S004	control	2	f	4	103.597	0.314586	67	32	10	0	0	15	2	4	1	20	4
S003-S004	S004	control	2	f	4	100.901	0.266779	67	32	10	0	0	16	2	4	1	20	4
S003-S004	S004	control	2	f	4	77.5835	0.206864	67	32	10	0	0	17	2	4	1	20	4
S003-S004	S004	control	2	f	4	69.148	0.213329	67	32	10	0	0	18	2	4	1	20	4
S003-S004	S004	control	2	f	4	54.742	0.173807	67	32	10	0	0	19	2	4	1	20	4
S003-S004	S004	control	2	f	4	65.6821	0.217194	67	32	10	0	0	20	2	4	1	20	4
S003-S004	S004	control	2	f	4	73.8746	0.167042	67	32	10	0	0	21	2	4	1	30	4
S003-S004	S004	control	2	f	4	74.8781	0.180664	67	32	10	0	0	22	2	4	1	30	4
S003-S004	S004	control	2	f	4	70.8871	0.223224	67	32	10	0	0	23	2	4	1	30	4
S003-S004	S004	control	2	f	4	66.363	0.175654	67	32	10	0	0	24	2	4	1	30	4
S003-S004	S004	control	2	f	4	60.1769	0.131327	67	32	10	0	0	25	2	4	1	30	4
S003-S004	S004	control	2	f	4	81.8162	0.239477	67	32	10	0	0	26	2	4	1	30	4
S003-S004	S004	control	2	f	4	121.365	0.257489	67	32	10	0	0	27	2	4	1	30	4
S003-S004	S004	control	2	f	4	101.299	0.301992	67	32	10	0	0	28	2	4	1	30	4
S003-S004	S004	control	2	f	4	106.146	0.226088	67	32	10	0	0	29	2	4	1	30	4
S003-S004	S004	control	2	f	4	151.918	0.333023	67	32	10	0	0	30	2	4	1	30	4
S003-S004	S004	control	2	f	4	119.27	0.26675	67	32	10	1	1	31	2	4	1	40	4
S003-S004	S004	control	2	f	4	66.5075	0.200504	67	32	10	1	0	32	2	4	1	40	4
S003-S004	S004	control	2	f	4	82.4542	0.167091	67	32	10	1	0	33	2	4	1	40	4
S003-S004	S004	control	2	f	4	92.9143	0.198956	67	32	10	1	0	34	2	4	1	40	4
S003-S004	S004	control	2	f	4	88.6462	0.172237	67	32	10	1	0	35	2	4	1	40	4
S003-S004	S004	control	2	f	4	71.6679	0.221945	67	32	10	1	0	36	2	4	1	40	4
S003-S004	S004	control	2	f	4	105.572	0.183283	67	32	10	1	0	37	2	4	1	40	4
S003-S004	S004	control	2	f	4	76.5416	0.126793	67	32	10	1	0	38	2	4	1	40	4
S003-S004	S004	control	2	f	4	93.3112	0.186513	67	32	10	1	0	39	2	4	1	40	4
S003-S004	S004	control	2	f	4	41.8124	0.171706	67	32	10	1	0	40	2	4	1	40	4
S003-S004	S004	control	2	f	4	100.796	0.189821	67	32	10	1	0	41	2	4	1	50	4
S003-S004	S004	control	2	f	4	87.7563	0.16862	67	32	10	1	0	42	2	4	1	50	4
S003-S004	S004	control	2	f	4	93.0089	0.186537	67	32	10	1	0	43	2	4	1	50	4
S003-S004	S004	control	2	f	4	61.5036	0.161055	67	32	10	1	0	44	2	4	1	50	4
S003-S004	S004	control	2	f	4	57.062	0.101268	67	32	10	1	0	45	2	4	1	50	4
S003-S004	S004	control	2	f	4	109.146	0.171716	67	32	10	1	0	46	2	4	1	50	4
S003-S004	S004	control	2	f	4	97.8912	0.240545	67	32	10	1	0	47	2	4	1	50	4
S003-S004	S004	control	2	f	4	76.5833	0.177167	67	32	10	1	0	48	2	4	1	50	4
S003-S004	S004	control	2	f	4	87.511	0.215514	67	32	10	1	0	49	2	4	1	50	4
S003-S004	S004	control	2	f	4	92.6361	0.17794	67	32	10	1	0	50	2	4	1	50	4
S003-S004	S004	control	2	f	4	93.3617	0.162261	67	32	10	1	0	51	2	4	1	60	4
S003-S004	S004	control	2	f	4	78.6034	0.220477	67	32	10	1	0	52	2	4	1	60	4
S003-S004	S004	control	2	f	4	75.7692	0.169807	67	32	10	1	0	53	2	4	1	60	4
S003-S004	S004	control	2	f	4	108.449	0.22427	67	32	10	1	0	54	2	4	1	60	4
S003-S004	S004	control	2	f	4	96.7293	0.214982	67	32	10	1	0	55	2	4	1	60	4
S003-S004	S004	control	2	f	4	107.683	0.277372	67	32	10	1	0	56	2	4	1	60	4
S003-S004	S004	control	2	f	4	96.2369	0.191949	67	32	10	1	0	57	2	4	1	60	4
S003-S004	S004	control	2	f	4	113.762	0.225356	67	32	10	1	0	58	2	4	1	60	4
S003-S004	S004	control	2	f	4	107.219	0.215327	67	32	10	1	0	59	2	4	1	60	4
S003-S004	S004	control	2	f	5	74.6963	0.244289	67	32	10	0	0	5	2	4	1	10	5
S003-S004	S004	control	2	f	5	64.742	0.19614	67	32	10	0	0	6	2	4	1	10	5
S003-S004	S004	control	2	f	5	93.6877	0.310187	67	32	10	0	0	7	2	4	1	10	5
S003-S004	S004	control	2	f	5	90.5381	0.303762	67	32	10	0	0	8	2	4	1	10	5
S003-S004	S004	control	2	f	5	78.4674	0.272061	67	32	10	0	0	9	2	4	1	10	5
S003-S004	S004	control	2	f	5	74.3333	0.275776	67	32	10	0	0	10	2	4	1	10	5
S003-S004	S004	control	2	f	5	83.2068	0.300642	67	32	10	0	0	11	2	4	1	20	5
S003-S004	S004	control	2	f	5	118.065	0.417513	67	32	10	0	0	12	2	4	1	20	5
S003-S004	S004	control	2	f	5	118.039	0.449897	67	32	10	1	1	13	2	4	1	20	5
S003-S004	S004	control	2	f	5	95.093	0.340027	67	32	10	1	0	14	2	4	1	20	5
S003-S004	S004	control	2	f	5	67.9182	0.268968	67	32	10	1	0	15	2	4	1	20	5
S003-S004	S004	control	2	f	5	74.8573	0.278437	67	32	10	1	0	16	2	4	1	20	5
S003-S004	S004	control	2	f	5	75.0337	0.235134	67	32	10	1	0	17	2	4	1	20	5
S003-S004	S004	control	2	f	5	95.8412	0.356068	67	32	10	1	0	18	2	4	1	20	5
S003-S004	S004	control	2	f	5	113.913	0.50773	67	32	10	1	0	19	2	4	1	20	5
S003-S004	S004	control	2	f	5	112.274	0.535458	67	32	10	1	0	20	2	4	1	20	5
S003-S004	S004	control	2	f	5	118.679	0.523087	67	32	10	1	0	21	2	4	1	30	5
S003-S004	S004	control	2	f	5	124.106	0.571279	67	32	10	1	0	22	2	4	1	30	5
S003-S004	S004	control	2	f	5	148.31	0.735176	67	32	10	1	0	23	2	4	1	30	5
S003-S004	S004	control	2	f	5	113.426	0.586448	67	32	10	1	0	24	2	4	1	30	5
S003-S004	S004	control	2	f	5	94.5247	0.446663	67	32	10	1	0	25	2	4	1	30	5
S003-S004	S004	control	2	f	5	68.0969	0.247327	67	32	10	1	0	26	2	4	1	30	5
S003-S004	S004	control	2	f	5	45.0825	0.140191	67	32	10	1	0	27	2	4	1	30	5
S003-S004	S004	control	2	f	5	54.5329	0.191021	67	32	10	1	0	28	2	4	1	30	5
S003-S004	S004	control	2	f	5	70.5095	0.283497	67	32	10	1	0	29	2	4	1	30	5
S003-S004	S004	control	2	f	5	65.4974	0.223039	67	32	10	1	0	30	2	4	1	30	5
S003-S004	S004	control	2	f	5	84.7061	0.290706	67	32	10	1	0	31	2	4	1	40	5
S003-S004	S004	control	2	f	5	103.276	0.38907	67	32	10	1	0	32	2	4	1	40	5
S003-S004	S004	control	2	f	5	63.7289	0.247249	67	32	10	1	0	33	2	4	1	40	5
S003-S004	S004	control	2	f	5	51.8516	0.202003	67	32	10	1	0	34	2	4	1	40	5
S003-S004	S004	control	2	f	5	61.8388	0.211815	67	32	10	1	0	35	2	4	1	40	5
S003-S004	S004	control	2	f	5	54.1854	0.145007	67	32	10	1	0	36	2	4	1	40	5
S003-S004	S004	control	2	f	5	75.1324	0.294649	67	32	10	1	0	37	2	4	1	40	5
S003-S004	S004	control	2	f	5	53.365	0.14763	67	32	10	1	0	38	2	4	1	40	5
S003-S004	S004	control	2	f	5	55.1606	0.119808	67	32	10	1	0	39	2	4	1	40	5
S003-S004	S004	control	2	f	5	48.9028	0.115522	67	32	10	1	0	40	2	4	1	40	5
S003-S004	S004	control	2	f	5	88.5536	0.356317	67	32	10	1	0	41	2	4	1	50	5
S003-S004	S004	control	2	f	5	113.548	0.47341	67	32	10	1	0	42	2	4	1	50	5
S003-S004	S004	control	2	f	5	96.8865	0.347738	67	32	10	1	0	43	2	4	1	50	5
S003-S004	S004	control	2	f	5	69.2542	0.161593	67	32	10	1	0	44	2	4	1	50	5
S003-S004	S004	control	2	f	5	55.9198	0.232171	67	32	10	1	0	45	2	4	1	50	5
S003-S004	S004	control	2	f	5	88.0819	0.395383	67	32	10	1	0	46	2	4	1	50	5
S003-S004	S004	control	2	f	5	112.585	0.50378	67	32	10	0	0	47	2	4	1	50	5
S003-S004	S004	control	2	f	5	74.1561	0.33483	67	32	10	0	0	48	2	4	1	50	5
S003-S004	S004	control	2	f	5	65.3124	0.256579	67	32	10	0	0	49	2	4	1	50	5
S003-S004	S004	control	2	f	5	63.2694	0.233394	67	32	10	0	0	50	2	4	1	50	5
S003-S004	S004	control	2	f	5	83.2205	0.315876	67	32	10	0	0	51	2	4	1	60	5
S003-S004	S004	control	2	f	5	143.612	0.731175	67	32	10	0	0	52	2	4	1	60	5
S003-S004	S004	control	2	f	5	185.435	0.432599	67	32	10	0	0	53	2	4	1	60	5
S003-S004	S004	control	2	f	5	179.355	0.459112	67	32	10	0	0	54	2	4	1	60	5
S003-S004	S004	control	2	f	5	147.289	0.656856	67	32	10	0	0	55	2	4	1	60	5
S003-S004	S004	control	2	f	5	92.9535	0.299765	67	32	10	0	0	56	2	4	1	60	5
S003-S004	S004	control	2	f	5	129.469	0.507945	67	32	10	0	0	57	2	4	1	60	5
S003-S004	S004	control	2	f	5	169.468	0.563725	67	32	10	0	0	58	2	4	1	60	5
S003-S004	S004	control	2	f	5	186.845	0.205459	67	32	10	0	0	59	2	4	1	60	5
S003-S004	S004	control	2	f	6	86.8884	0.352	67	32	10	0	0	5	2	4	1	10	6
S003-S004	S004	control	2	f	6	49.5203	0.171493	67	32	10	0	0	6	2	4	1	10	6
S003-S004	S004	control	2	f	6	43.1151	0.143262	67	32	10	0	0	7	2	4	1	10	6
S003-S004	S004	control	2	f	6	45.2085	0.15726	67	32	10	0	0	8	2	4	1	10	6
S003-S004	S004	control	2	f	6	46.3023	0.150119	67	32	10	0	0	9	2	4	1	10	6
S003-S004	S004	control	2	f	6	67.1685	0.195972	67	32	10	0	0	10	2	4	1	10	6
S003-S004	S004	control	2	f	6	60.1249	0.172747	67	32	10	0	0	11	2	4	1	20	6
S003-S004	S004	control	2	f	6	44.7706	0.133267	67	32	10	0	0	12	2	4	1	20	6
S003-S004	S004	control	2	f	6	42.6554	0.133791	67	32	10	0	0	13	2	4	1	20	6
S003-S004	S004	control	2	f	6	47.4387	0.147898	67	32	10	0	0	14	2	4	1	20	6
S003-S004	S004	control	2	f	6	60.5146	0.218627	67	32	10	0	0	15	2	4	1	20	6
S003-S004	S004	control	2	f	6	61.7546	0.169093	67	32	10	0	0	16	2	4	1	20	6
S003-S004	S004	control	2	f	6	57.7371	0.169772	67	32	10	0	0	17	2	4	1	20	6
S003-S004	S004	control	2	f	6	59.0406	0.249869	67	32	10	1	1	18	2	4	1	20	6
S003-S004	S004	control	2	f	6	43.2763	0.128444	67	32	10	1	0	19	2	4	1	20	6
S003-S004	S004	control	2	f	6	50.0718	0.163419	67	32	10	1	0	20	2	4	1	20	6
S003-S004	S004	control	2	f	6	65.132	0.170648	67	32	10	1	0	21	2	4	1	30	6
S003-S004	S004	control	2	f	6	72.3848	0.205649	67	32	10	1	0	22	2	4	1	30	6
S003-S004	S004	control	2	f	6	39.1633	0.149634	67	32	10	1	0	23	2	4	1	30	6
S003-S004	S004	control	2	f	6	52.262	0.170851	67	32	10	1	0	24	2	4	1	30	6
S003-S004	S004	control	2	f	6	53.8928	0.189899	67	32	10	1	0	25	2	4	1	30	6
S003-S004	S004	control	2	f	6	50.0488	0.162493	67	32	10	1	0	26	2	4	1	30	6
S003-S004	S004	control	2	f	6	53.759	0.134743	67	32	10	1	0	27	2	4	1	30	6
S003-S004	S004	control	2	f	6	43.7163	0.130896	67	32	10	1	0	28	2	4	1	30	6
S003-S004	S004	control	2	f	6	35.0111	0.110343	67	32	10	1	0	29	2	4	1	30	6
S003-S004	S004	control	2	f	6	37.7165	0.147297	67	32	10	1	0	30	2	4	1	30	6
S003-S004	S004	control	2	f	6	50.7483	0.175576	67	32	10	1	0	31	2	4	1	40	6
S003-S004	S004	control	2	f	6	46.5811	0.172659	67	32	10	1	0	32	2	4	1	40	6
S003-S004	S004	control	2	f	6	60.9392	0.188133	67	32	10	1	0	33	2	4	1	40	6
S003-S004	S004	control	2	f	6	47.8913	0.193425	67	32	10	1	0	34	2	4	1	40	6
S003-S004	S004	control	2	f	6	43.956	0.143	67	32	10	1	0	35	2	4	1	40	6
S003-S004	S004	control	2	f	6	48.2813	0.163607	67	32	10	1	0	36	2	4	1	40	6
S003-S004	S004	control	2	f	6	48.6031	0.1665	67	32	10	1	0	37	2	4	1	40	6
S003-S004	S004	control	2	f	6	46.0018	0.178052	67	32	10	1	0	38	2	4	1	40	6
S003-S004	S004	control	2	f	6	54.8479	0.119418	67	32	10	1	0	39	2	4	1	40	6
S003-S004	S004	control	2	f	6	47.7723	0.194691	67	32	10	1	0	40	2	4	1	40	6
S003-S004	S004	control	2	f	6	47.4163	0.207604	67	32	10	1	0	41	2	4	1	50	6
S003-S004	S004	control	2	f	6	56.7963	0.210551	67	32	10	1	0	42	2	4	1	50	6
S003-S004	S004	control	2	f	6	53.3861	0.14384	67	32	10	0	0	43	2	4	1	50	6
S003-S004	S004	control	2	f	6	48.0468	0.182913	67	32	10	0	0	44	2	4	1	50	6
S003-S004	S004	control	2	f	6	58.0268	0.147138	67	32	10	0	0	45	2	4	1	50	6
S003-S004	S004	control	2	f	6	62.5211	0.194339	67	32	10	0	0	46	2	4	1	50	6
S003-S004	S004	control	2	f	6	68.466	0.160098	67	32	10	0	0	47	2	4	1	50	6
S003-S004	S004	control	2	f	6	54.8742	0.115753	67	32	10	0	0	48	2	4	1	50	6
S003-S004	S004	control	2	f	6	59.9383	0.126073	67	32	10	0	0	49	2	4	1	50	6
S003-S004	S004	control	2	f	6	79.9634	0.187955	67	32	10	0	0	50	2	4	1	50	6
S003-S004	S004	control	2	f	6	50.755	0.167108	67	32	10	0	0	51	2	4	1	60	6
S003-S004	S004	control	2	f	6	53.5468	0.137831	67	32	10	0	0	52	2	4	1	60	6
S003-S004	S004	control	2	f	6	59.0952	0.150378	67	32	10	0	0	53	2	4	1	60	6
S003-S004	S004	control	2	f	6	105.176	0.30464	67	32	10	0	0	54	2	4	1	60	6
S003-S004	S004	control	2	f	6	90.0106	0.202675	67	32	10	0	0	55	2	4	1	60	6
S003-S004	S004	control	2	f	6	82.8002	0.195553	67	32	10	0	0	56	2	4	1	60	6
S003-S004	S004	control	2	f	6	97.9337	0.179317	67	32	10	0	0	57	2	4	1	60	6
S003-S004	S004	control	2	f	6	75.1507	0.185325	67	32	10	0	0	58	2	4	1	60	6
S003-S004	S004	control	2	f	6	44.7128	0.12008	67	32	10	0	0	59	2	4	1	60	6
S005-S006	S005	control	3	m	1	169.335	0.329659	59	34	10	0	0	5	3	5	2	10	1
S005-S006	S005	control	3	m	1	148.795	0.316093	59	34	10	0	0	6	3	5	2	10	1
S005-S006	S005	control	3	m	1	93.2318	0.165918	59	34	10	0	0	7	3	5	2	10	1
S005-S006	S005	control	3	m	1	141.799	0.207799	59	34	10	0	0	8	3	5	2	10	1
S005-S006	S005	control	3	m	1	60.5208	0.108983	59	34	10	1	1	9	3	5	2	10	1
S005-S006	S005	control	3	m	1	109.892	0.216399	59	34	10	1	0	10	3	5	2	10	1
S005-S006	S005	control	3	m	1	111.227	0.182134	59	34	10	1	0	11	3	5	2	20	1
S005-S006	S005	control	3	m	1	69.301	0.174781	59	34	10	1	0	12	3	5	2	20	1
S005-S006	S005	control	3	m	1	93.1646	0.144152	59	34	10	1	0	13	3	5	2	20	1
S005-S006	S005	control	3	m	1	67.784	0.0895193	59	34	10	1	0	14	3	5	2	20	1
S005-S006	S005	control	3	m	1	59.0165	0.166484	59	34	10	1	0	15	3	5	2	20	1
S005-S006	S005	control	3	m	1	111.398	0.106366	59	34	10	1	0	16	3	5	2	20	1
S005-S006	S005	control	3	m	1	85.5519	0.127087	59	34	10	1	0	17	3	5	2	20	1
S005-S006	S005	control	3	m	1	49.2474	0.0732636	59	34	10	1	0	18	3	5	2	20	1
S005-S006	S005	control	3	m	1	68.7087	0.0744296	59	34	10	1	0	19	3	5	2	20	1
S005-S006	S005	control	3	m	1	75.6355	0.12508	59	34	10	1	0	20	3	5	2	20	1
S005-S006	S005	control	3	m	1	53.3247	0.125075	59	34	10	1	0	21	3	5	2	30	1
S005-S006	S005	control	3	m	1	96.2429	0.190347	59	34	10	1	0	22	3	5	2	30	1
S005-S006	S005	control	3	m	1	62.0562	0.117004	59	34	10	1	0	23	3	5	2	30	1
S005-S006	S005	control	3	m	1	51.9102	0.0868808	59	34	10	1	0	24	3	5	2	30	1
S005-S006	S005	control	3	m	1	79.9467	0.0798246	59	34	10	1	0	25	3	5	2	30	1
S005-S006	S005	control	3	m	1	51.3916	0.0925887	59	34	10	1	0	26	3	5	2	30	1
S005-S006	S005	control	3	m	1	49.4114	0.0861253	59	34	10	1	0	27	3	5	2	30	1
S005-S006	S005	control	3	m	1	83.3869	0.098985	59	34	10	1	0	28	3	5	2	30	1
S005-S006	S005	control	3	m	1	72.7158	0.0892463	59	34	10	1	0	29	3	5	2	30	1
S005-S006	S005	control	3	m	1	54.5323	0.0760271	59	34	10	1	0	30	3	5	2	30	1
S005-S006	S005	control	3	m	1	80.1136	0.0791887	59	34	10	1	0	31	3	5	2	40	1
S005-S006	S005	control	3	m	1	52.8537	0.061955	59	34	10	1	0	32	3	5	2	40	1
S005-S006	S005	control	3	m	1	62.3831	0.0684639	59	34	10	1	0	33	3	5	2	40	1
S005-S006	S005	control	3	m	1	48.1471	0.0633071	59	34	10	1	0	34	3	5	2	40	1
S005-S006	S005	control	3	m	1	65.5845	0.0928853	59	34	10	1	0	35	3	5	2	40	1
S005-S006	S005	control	3	m	1	72.3815	0.0886491	59	34	10	1	0	36	3	5	2	40	1
S005-S006	S005	control	3	m	1	85.2576	0.0743671	59	34	10	1	0	37	3	5	2	40	1
S005-S006	S005	control	3	m	1	56.8133	0.104389	59	34	10	1	0	38	3	5	2	40	1
S005-S006	S005	control	3	m	1	115.175	0.18655	59	34	10	1	0	39	3	5	2	40	1
S005-S006	S005	control	3	m	1	66.077	0.143116	59	34	10	1	0	40	3	5	2	40	1
S005-S006	S005	control	3	m	1	69.5242	0.0783194	59	34	10	1	0	41	3	5	2	50	1
S005-S006	S005	control	3	m	1	94.1804	0.0775166	59	34	10	1	0	42	3	5	2	50	1
S005-S006	S005	control	3	m	1	37.4086	0.100399	59	34	10	1	0	43	3	5	2	50	1
S005-S006	S005	control	3	m	1	81.9078	0.111541	59	34	10	1	0	44	3	5	2	50	1
S005-S006	S005	control	3	m	1	59.019	0.122061	59	34	10	1	0	45	3	5	2	50	1
S005-S006	S005	control	3	m	1	64.5391	0.085715	59	34	10	1	0	46	3	5	2	50	1
S005-S006	S005	control	3	m	1	50.4395	0.0979056	59	34	10	1	0	47	3	5	2	50	1
S005-S006	S005	control	3	m	1	36.6993	0.110111	59	34	10	1	0	48	3	5	2	50	1
S005-S006	S005	control	3	m	1	65.3525	0.0773997	59	34	10	1	0	49	3	5	2	50	1
S005-S006	S005	control	3	m	1	47.9327	0.0857502	59	34	10	1	0	50	3	5	2	50	1
S005-S006	S005	control	3	m	1	59.8979	0.097315	59	34	10	1	0	51	3	5	2	60	1
S005-S006	S005	control	3	m	1	43.8201	0.0853631	59	34	10	1	0	52	3	5	2	60	1
S005-S006	S005	control	3	m	1	77.9738	0.172453	59	34	10	1	0	53	3	5	2	60	1
S005-S006	S005	control	3	m	1	58.1676	0.112782	59	34	10	1	0	54	3	5	2	60	1
S005-S006	S005	control	3	m	1	71.5938	0.116071	59	34	10	1	0	55	3	5	2	60	1
S005-S006	S005	control	3	m	1	63.7831	0.109485	59	34	10	1	0	56	3	5	2	60	1
S005-S006	S005	control	3	m	1	119.175	0.185834	59	34	10	1	0	57	3	5	2	60	1
S005-S006	S005	control	3	m	1	71.8039	0.0758749	59	34	10	1	0	58	3	5	2	60	1
S005-S006	S005	control	3	m	1			59	34	10	0	0	59	3	5	2	60	1
S005-S006	S005	control	3	m	2	273.866	0.304069	59	34	10	0	0	5	3	5	2	10	2
S005-S006	S005	control	3	m	2	115.805	0.137631	59	34	10	0	0	6	3	5	2	10	2
S005-S006	S005	control	3	m	2	89.6318	0.119276	59	34	10	0	0	7	3	5	2	10	2
S005-S006	S005	control	3	m	2	75.933	0.150336	59	34	10	0	0	8	3	5	2	10	2
S005-S006	S005	control	3	m	2	111.17	0.118174	59	34	10	0	0	9	3	5	2	10	2
S005-S006	S005	control	3	m	2	103.444	0.146132	59	34	10	0	0	10	3	5	2	10	2
S005-S006	S005	control	3	m	2	123.473	0.138669	59	34	10	0	0	11	3	5	2	20	2
S005-S006	S005	control	3	m	2	101.926	0.201623	59	34	10	0	0	12	3	5	2	20	2
S005-S006	S005	control	3	m	2	120.531	0.234276	59	34	10	0	0	13	3	5	2	20	2
S005-S006	S005	control	3	m	2	123.813	0.176203	59	34	10	0	0	14	3	5	2	20	2
S005-S006	S005	control	3	m	2	94.1128	0.157974	59	34	10	0	0	15	3	5	2	20	2
S005-S006	S005	control	3	m	2	100.577	0.107499	59	34	10	0	0	16	3	5	2	20	2
S005-S006	S005	control	3	m	2	75.5161	0.133102	59	34	10	0	0	17	3	5	2	20	2
S005-S006	S005	control	3	m	2	87.7255	0.167713	59	34	10	1	1	18	3	5	2	20	2
S005-S006	S005	control	3	m	2	119.183	0.147456	59	34	10	1	0	19	3	5	2	20	2
S005-S006	S005	control	3	m	2	69.8717	0.120275	59	34	10	1	0	20	3	5	2	20	2
S005-S006	S005	control	3	m	2	98.4781	0.122414	59	34	10	1	0	21	3	5	2	30	2
S005-S006	S005	control	3	m	2	102.825	0.182168	59	34	10	1	0	22	3	5	2	30	2
S005-S006	S005	control	3	m	2	87.9236	0.250965	59	34	10	1	0	23	3	5	2	30	2
S005-S006	S005	control	3	m	2	117.615	0.276397	59	34	10	1	0	24	3	5	2	30	2
S005-S006	S005	control	3	m	2	97.5021	0.266455	59	34	10	1	0	25	3	5	2	30	2
S005-S006	S005	control	3	m	2	93.1091	0.212513	59	34	10	1	0	26	3	5	2	30	2
S005-S006	S005	control	3	m	2	81.2304	0.168743	59	34	10	1	0	27	3	5	2	30	2
S005-S006	S005	control	3	m	2	74.8357	0.123626	59	34	10	1	0	28	3	5	2	30	2
S005-S006	S005	control	3	m	2	84.17	0.125526	59	34	10	1	0	29	3	5	2	30	2
S005-S006	S005	control	3	m	2	73.0345	0.145659	59	34	10	1	0	30	3	5	2	30	2
S005-S006	S005	control	3	m	2	96.2829	0.121067	59	34	10	1	0	31	3	5	2	40	2
S005-S006	S005	control	3	m	2	87.398	0.165823	59	34	10	1	0	32	3	5	2	40	2
S005-S006	S005	control	3	m	2	123.006	0.286332	59	34	10	1	0	33	3	5	2	40	2
S005-S006	S005	control	3	m	2	86.9303	0.208603	59	34	10	1	0	34	3	5	2	40	2
S005-S006	S005	control	3	m	2	85.2743	0.205097	59	34	10	1	0	35	3	5	2	40	2
S005-S006	S005	control	3	m	2	71.3699	0.154348	59	34	10	1	0	36	3	5	2	40	2
S005-S006	S005	control	3	m	2	78.2077	0.175796	59	34	10	1	0	37	3	5	2	40	2
S005-S006	S005	control	3	m	2	73.1709	0.117645	59	34	10	1	0	38	3	5	2	40	2
S005-S006	S005	control	3	m	2	81.9465	0.0780091	59	34	10	1	0	39	3	5	2	40	2
S005-S006	S005	control	3	m	2	93.5504	0.159905	59	34	10	1	0	40	3	5	2	40	2
S005-S006	S005	control	3	m	2	108.402	0.235221	59	34	10	1	0	41	3	5	2	50	2
S005-S006	S005	control	3	m	2	119.346	0.261063	59	34	10	1	0	42	3	5	2	50	2
S005-S006	S005	control	3	m	2	111.844	0.245619	59	34	10	1	0	43	3	5	2	50	2
S005-S006	S005	control	3	m	2	134.023	0.200713	59	34	10	1	0	44	3	5	2	50	2
S005-S006	S005	control	3	m	2	121.072	0.213214	59	34	10	1	0	45	3	5	2	50	2
S005-S006	S005	control	3	m	2	92.6654	0.185337	59	34	10	1	0	46	3	5	2	50	2
S005-S006	S005	control	3	m	2	110.383	0.243539	59	34	10	1	0	47	3	5	2	50	2
S005-S006	S005	control	3	m	2	145.626	0.311619	59	34	10	1	0	48	3	5	2	50	2
S005-S006	S005	control	3	m	2	95.1471	0.300421	59	34	10	1	0	49	3	5	2	50	2
S005-S006	S005	control	3	m	2	119.248	0.209038	59	34	10	1	0	50	3	5	2	50	2
S005-S006	S005	control	3	m	2	74.3336	0.160052	59	34	10	1	0	51	3	5	2	60	2
S005-S006	S005	control	3	m	2	115.872	0.211803	59	34	10	1	0	52	3	5	2	60	2
S005-S006	S005	control	3	m	2	110.327	0.174853	59	34	10	1	0	53	3	5	2	60	2
S005-S006	S005	control	3	m	2	122.025	0.279825	59	34	10	1	0	54	3	5	2	60	2
S005-S006	S005	control	3	m	2	150.601	0.319002	59	34	10	1	0	55	3	5	2	60	2
S005-S006	S005	control	3	m	2	82.7944	0.184525	59	34	10	1	0	56	3	5	2	60	2
S005-S006	S005	control	3	m	2	111.212	0.157011	59	34	10	1	0	57	3	5	2	60	2
S005-S006	S005	control	3	m	2	91.8385	0.1531	59	34	10	1	0	58	3	5	2	60	2
S005-S006	S005	control	3	m	2	103.422	0.128069	59	34	10	1	0	59	3	5	2	60	2
S005-S006	S005	control	3	m	3	143.048	0.117669	59	34	10	0	0	5	3	5	2	10	3
S005-S006	S005	control	3	m	3	160.937	0.147899	59	34	10	0	0	6	3	5	2	10	3
S005-S006	S005	control	3	m	3	120.849	0.24823	59	34	10	0	0	7	3	5	2	10	3
S005-S006	S005	control	3	m	3	171.8	0.199498	59	34	10	0	0	8	3	5	2	10	3
S005-S006	S005	control	3	m	3	109.965	0.221744	59	34	10	0	0	9	3	5	2	10	3
S005-S006	S005	control	3	m	3	148.543	0.159725	59	34	10	0	0	10	3	5	2	10	3
S005-S006	S005	control	3	m	3	76.4376	0.214732	59	34	10	0	0	11	3	5	2	20	3
S005-S006	S005	control	3	m	3	144.76	0.160457	59	34	10	0	0	12	3	5	2	20	3
S005-S006	S005	control	3	m	3	88.8367	0.175154	59	34	10	0	0	13	3	5	2	20	3
S005-S006	S005	control	3	m	3	105.304	0.161528	59	34	10	0	0	14	3	5	2	20	3
S005-S006	S005	control	3	m	3	122.557	0.225442	59	34	10	0	0	15	3	5	2	20	3
S005-S006	S005	control	3	m	3	120.457	0.191015	59	34	10	0	0	16	3	5	2	20	3
S005-S006	S005	control	3	m	3	109.059	0.172335	59	34	10	0	0	17	3	5	2	20	3
S005-S006	S005	control	3	m	3	100.014	0.204754	59	34	10	0	0	18	3	5	2	20	3
S005-S006	S005	control	3	m	3	71.6202	0.138428	59	34	10	0	0	19	3	5	2	20	3
S005-S006	S005	control	3	m	3	80.1185	0.188714	59	34	10	0	0	20	3	5	2	20	3
S005-S006	S005	control	3	m	3	106.589	0.190528	59	34	10	0	0	21	3	5	2	30	3
S005-S006	S005	control	3	m	3	79.613	0.189115	59	34	10	0	0	22	3	5	2	30	3
S005-S006	S005	control	3	m	3	81.5898	0.153769	59	34	10	0	0	23	3	5	2	30	3
S005-S006	S005	control	3	m	3	83.7377	0.200449	59	34	10	0	0	24	3	5	2	30	3
S005-S006	S005	control	3	m	3	82.2489	0.13415	59	34	10	0	0	25	3	5	2	30	3
S005-S006	S005	control	3	m	3	85.0522	0.177803	59	34	10	0	0	26	3	5	2	30	3
S005-S006	S005	control	3	m	3	76.2287	0.143133	59	34	10	0	0	27	3	5	2	30	3
S005-S006	S005	control	3	m	3	79.9616	0.15425	59	34	10	0	0	28	3	5	2	30	3
S005-S006	S005	control	3	m	3	91.1974	0.125728	59	34	10	0	0	29	3	5	2	30	3
S005-S006	S005	control	3	m	3	61.4512	0.182842	59	34	10	0	0	30	3	5	2	30	3
S005-S006	S005	control	3	m	3	110.001	0.0955485	59	34	10	0	0	31	3	5	2	40	3
S005-S006	S005	control	3	m	3	54.1078	0.145889	59	34	10	0	0	32	3	5	2	40	3
S005-S006	S005	control	3	m	3	80.3582	0.140464	59	34	10	0	0	33	3	5	2	40	3
S005-S006	S005	control	3	m	3	96.2625	0.219756	59	34	10	0	0	34	3	5	2	40	3
S005-S006	S005	control	3	m	3	66.2964	0.12205	59	34	10	0	0	35	3	5	2	40	3
S005-S006	S005	control	3	m	3	51.355	0.0940507	59	34	10	0	0	36	3	5	2	40	3
S005-S006	S005	control	3	m	3	64.9797	0.105096	59	34	10	0	0	37	3	5	2	40	3
S005-S006	S005	control	3	m	3	70.6869	0.121748	59	34	10	0	0	38	3	5	2	40	3
S005-S006	S005	control	3	m	3	80.0926	0.146159	59	34	10	0	0	39	3	5	2	40	3
S005-S006	S005	control	3	m	3	67.5261	0.173175	59	34	10	0	0	40	3	5	2	40	3
S005-S006	S005	control	3	m	3	96.1826	0.215649	59	34	10	0	0	41	3	5	2	50	3
S005-S006	S005	control	3	m	3	82.2663	0.103822	59	34	10	0	0	42	3	5	2	50	3
S005-S006	S005	control	3	m	3	83.3698	0.154034	59	34	10	1	1	43	3	5	2	50	3
S005-S006	S005	control	3	m	3	78.7235	0.120143	59	34	10	1	0	44	3	5	2	50	3
S005-S006	S005	control	3	m	3	70.3828	0.161539	59	34	10	1	0	45	3	5	2	50	3
S005-S006	S005	control	3	m	3	58.9623	0.096027	59	34	10	1	0	46	3	5	2	50	3
S005-S006	S005	control	3	m	3	60.1044	0.100171	59	34	10	1	0	47	3	5	2	50	3
S005-S006	S005	control	3	m	3	67.5833	0.129856	59	34	10	1	0	48	3	5	2	50	3
S005-S006	S005	control	3	m	3	69.619	0.123729	59	34	10	1	0	49	3	5	2	50	3
S005-S006	S005	control	3	m	3	88.8672	0.207468	59	34	10	1	0	50	3	5	2	50	3
S005-S006	S005	control	3	m	3	74.6308	0.195371	59	34	10	1	0	51	3	5	2	60	3
S005-S006	S005	control	3	m	3	73.1352	0.186194	59	34	10	1	0	52	3	5	2	60	3
S005-S006	S005	control	3	m	3	74.8055	0.125518	59	34	10	1	0	53	3	5	2	60	3
S005-S006	S005	control	3	m	3	72.7507	0.144277	59	34	10	0	0	54	3	5	2	60	3
S005-S006	S005	control	3	m	3	60.9637	0.132056	59	34	10	0	0	55	3	5	2	60	3
S005-S006	S005	control	3	m	3	77.3047	0.171384	59	34	10	0	0	56	3	5	2	60	3
S005-S006	S005	control	3	m	3	79.1227	0.185253	59	34	10	0	0	57	3	5	2	60	3
S005-S006	S005	control	3	m	3	133.955	0.236593	59	34	10	1	1	58	3	5	2	60	3
S005-S006	S005	control	3	m	3	102.712	0.152562	59	34	10	1	0	59	3	5	2	60	3
S005-S006	S005	control	3	m	4	186.071	0.235429	59	34	10	0	0	5	3	5	2	10	4
S005-S006	S005	control	3	m	4	102.753	0.159575	59	34	10	0	0	6	3	5	2	10	4
S005-S006	S005	control	3	m	4	121.503	0.119846	59	34	10	0	0	7	3	5	2	10	4
S005-S006	S005	control	3	m	4	71.7406	0.243371	59	34	10	0	0	8	3	5	2	10	4
S005-S006	S005	control	3	m	4	158.366	0.127418	59	34	10	0	0	9	3	5	2	10	4
S005-S006	S005	control	3	m	4	62.9507	0.190154	59	34	10	0	0	10	3	5	2	10	4
S005-S006	S005	control	3	m	4	101.585	0.145514	59	34	10	0	0	11	3	5	2	20	4
S005-S006	S005	control	3	m	4	58.0369	0.163112	59	34	10	0	0	12	3	5	2	20	4
S005-S006	S005	control	3	m	4	111.329	0.13067	59	34	10	0	0	13	3	5	2	20	4
S005-S006	S005	control	3	m	4	109.785	0.180373	59	34	10	0	0	14	3	5	2	20	4
S005-S006	S005	control	3	m	4	72.2191	0.17295	59	34	10	0	0	15	3	5	2	20	4
S005-S006	S005	control	3	m	4	81.8206	0.131266	59	34	10	0	0	16	3	5	2	20	4
S005-S006	S005	control	3	m	4	72.5946	0.158493	59	34	10	0	0	17	3	5	2	20	4
S005-S006	S005	control	3	m	4	109.166	0.090384	59	34	10	0	0	18	3	5	2	20	4
S005-S006	S005	control	3	m	4	48.8494	0.126442	59	34	10	0	0	19	3	5	2	20	4
S005-S006	S005	control	3	m	4	63.8714	0.137792	59	34	10	0	0	20	3	5	2	20	4
S005-S006	S005	control	3	m	4	45.9618	0.1122	59	34	10	0	0	21	3	5	2	30	4
S005-S006	S005	control	3	m	4	70.8418	0.12149	59	34	10	0	0	22	3	5	2	30	4
S005-S006	S005	control	3	m	4	59.5623	0.133172	59	34	10	0	0	23	3	5	2	30	4
S005-S006	S005	control	3	m	4	56.3024	0.103792	59	34	10	0	0	24	3	5	2	30	4
S005-S006	S005	control	3	m	4	43.5852	0.109403	59	34	10	0	0	25	3	5	2	30	4
S005-S006	S005	control	3	m	4	80.5659	0.169138	59	34	10	1	1	26	3	5	2	30	4
S005-S006	S005	control	3	m	4	61.4011	0.115457	59	34	10	1	0	27	3	5	2	30	4
S005-S006	S005	control	3	m	4	56.3317	0.138831	59	34	10	1	0	28	3	5	2	30	4
S005-S006	S005	control	3	m	4	82.8525	0.153391	59	34	10	1	0	29	3	5	2	30	4
S005-S006	S005	control	3	m	4	63.2694	0.122556	59	34	10	1	0	30	3	5	2	30	4
S005-S006	S005	control	3	m	4	56.379	0.108922	59	34	10	1	0	31	3	5	2	40	4
S005-S006	S005	control	3	m	4	70.3379	0.131008	59	34	10	1	0	32	3	5	2	40	4
S005-S006	S005	control	3	m	4	73.5067	0.126134	59	34	10	1	0	33	3	5	2	40	4
S005-S006	S005	control	3	m	4	65.1572	0.0963247	59	34	10	1	0	34	3	5	2	40	4
S005-S006	S005	control	3	m	4	59.7805	0.134549	59	34	10	1	0	35	3	5	2	40	4
S005-S006	S005	control	3	m	4	70.4515	0.106642	59	34	10	1	0	36	3	5	2	40	4
S005-S006	S005	control	3	m	4	49.7555	0.128119	59	34	10	1	0	37	3	5	2	40	4
S005-S006	S005	control	3	m	4	65.7285	0.109762	59	34	10	1	0	38	3	5	2	40	4
S005-S006	S005	control	3	m	4	60.1308	0.148281	59	34	10	1	0	39	3	5	2	40	4
S005-S006	S005	control	3	m	4	95.4373	0.166754	59	34	10	1	0	40	3	5	2	40	4
S005-S006	S005	control	3	m	4	55.8841	0.101157	59	34	10	1	0	41	3	5	2	50	4
S005-S006	S005	control	3	m	4	62.424	0.0904432	59	34	10	1	0	42	3	5	2	50	4
S005-S006	S005	control	3	m	4	78.4966	0.106515	59	34	10	1	0	43	3	5	2	50	4
S005-S006	S005	control	3	m	4	88.8703	0.123532	59	34	10	1	0	44	3	5	2	50	4
S005-S006	S005	control	3	m	4	105.696	0.103	59	34	10	1	0	45	3	5	2	50	4
S005-S006	S005	control	3	m	4	107.887	0.117558	59	34	10	1	0	46	3	5	2	50	4
S005-S006	S005	control	3	m	4	95.388	0.108642	59	34	10	1	0	47	3	5	2	50	4
S005-S006	S005	control	3	m	4	122.03	0.155767	59	34	10	1	0	48	3	5	2	50	4
S005-S006	S005	control	3	m	4	99.8409	0.178914	59	34	10	1	0	49	3	5	2	50	4
S005-S006	S005	control	3	m	4	52.1522	0.159632	59	34	10	1	0	50	3	5	2	50	4
S005-S006	S005	control	3	m	4	72.7599	0.106673	59	34	10	1	0	51	3	5	2	60	4
S005-S006	S005	control	3	m	4	66.9936	0.0879678	59	34	10	1	0	52	3	5	2	60	4
S005-S006	S005	control	3	m	4	63.7888	0.167087	59	34	10	1	0	53	3	5	2	60	4
S005-S006	S005	control	3	m	4	56.4624	0.110612	59	34	10	1	0	54	3	5	2	60	4
S005-S006	S005	control	3	m	4	60.8554	0.143025	59	34	10	1	0	55	3	5	2	60	4
S005-S006	S005	control	3	m	4	97.3937	0.165794	59	34	10	1	0	56	3	5	2	60	4
S005-S006	S005	control	3	m	4	90.3598	0.20494	59	34	10	1	0	57	3	5	2	60	4
S005-S006	S005	control	3	m	4	84.3861	0.172634	59	34	10	1	0	58	3	5	2	60	4
S005-S006	S005	control	3	m	4	56.4421	0.192878	59	34	10	1	0	59	3	5	2	60	4
S005-S006	S005	control	3	m	5	202.434	0.47294	59	34	10	0	0	5	3	5	2	10	5
S005-S006	S005	control	3	m	5	222.503	0.337759	59	34	10	0	0	6	3	5	2	10	5
S005-S006	S005	control	3	m	5	101.138	0.195817	59	34	10	0	0	7	3	5	2	10	5
S005-S006	S005	control	3	m	5	157.29	0.188016	59	34	10	0	0	8	3	5	2	10	5
S005-S006	S005	control	3	m	5	102.739	0.123651	59	34	10	0	0	9	3	5	2	10	5
S005-S006	S005	control	3	m	5	158.479	0.164556	59	34	10	0	0	10	3	5	2	10	5
S005-S006	S005	control	3	m	5	95.8577	0.157879	59	34	10	0	0	11	3	5	2	20	5
S005-S006	S005	control	3	m	5	134.445	0.113672	59	34	10	0	0	12	3	5	2	20	5
S005-S006	S005	control	3	m	5	134.885	0.149096	59	34	10	0	0	13	3	5	2	20	5
S005-S006	S005	control	3	m	5	105.949	0.11849	59	34	10	0	0	14	3	5	2	20	5
S005-S006	S005	control	3	m	5	137.743	0.133689	59	34	10	1	1	15	3	5	2	20	5
S005-S006	S005	control	3	m	5	135.794	0.114697	59	34	10	1	0	16	3	5	2	20	5
S005-S006	S005	control	3	m	5	130.518	0.195594	59	34	10	1	0	17	3	5	2	20	5
S005-S006	S005	control	3	m	5	137.389	0.163648	59	34	10	1	0	18	3	5	2	20	5
S005-S006	S005	control	3	m	5	128.069	0.199232	59	34	10	1	0	19	3	5	2	20	5
S005-S006	S005	control	3	m	5	175.625	0.191888	59	34	10	1	0	20	3	5	2	20	5
S005-S006	S005	control	3	m	5	120.761	0.17745	59	34	10	1	0	21	3	5	2	30	5
S005-S006	S005	control	3	m	5	141.935	0.126843	59	34	10	1	0	22	3	5	2	30	5
S005-S006	S005	control	3	m	5	139.132	0.152177	59	34	10	1	0	23	3	5	2	30	5
S005-S006	S005	control	3	m	5	89.1886	0.12307	59	34	10	1	0	24	3	5	2	30	5
S005-S006	S005	control	3	m	5	150.183	0.220733	59	34	10	1	0	25	3	5	2	30	5
S005-S006	S005	control	3	m	5	81.5949	0.216176	59	34	10	1	0	26	3	5	2	30	5
S005-S006	S005	control	3	m	5	110.771	0.19965	59	34	10	1	0	27	3	5	2	30	5
S005-S006	S005	control	3	m	5	169.877	0.272597	59	34	10	1	0	28	3	5	2	30	5
S005-S006	S005	control	3	m	5	74.108	0.229301	59	34	10	1	0	29	3	5	2	30	5
S005-S006	S005	control	3	m	5	130.672	0.179308	59	34	10	1	0	30	3	5	2	30	5
S005-S006	S005	control	3	m	5	123.526	0.161725	59	34	10	1	0	31	3	5	2	40	5
S005-S006	S005	control	3	m	5	108.704	0.176491	59	34	10	1	0	32	3	5	2	40	5
S005-S006	S005	control	3	m	5	132.86	0.209764	59	34	10	1	0	33	3	5	2	40	5
S005-S006	S005	control	3	m	5	157.592	0.223194	59	34	10	1	0	34	3	5	2	40	5
S005-S006	S005	control	3	m	5	101.723	0.160799	59	34	10	1	0	35	3	5	2	40	5
S005-S006	S005	control	3	m	5	138.874	0.206249	59	34	10	1	0	36	3	5	2	40	5
S005-S006	S005	control	3	m	5	84.3564	0.234528	59	34	10	1	0	37	3	5	2	40	5
S005-S006	S005	control	3	m	5	150.074	0.260521	59	34	10	1	0	38	3	5	2	40	5
S005-S006	S005	control	3	m	5	162.745	0.279172	59	34	10	1	0	39	3	5	2	40	5
S005-S006	S005	control	3	m	5	100.75	0.321844	59	34	10	1	0	40	3	5	2	40	5
S005-S006	S005	control	3	m	5	169.992	0.276795	59	34	10	1	0	41	3	5	2	50	5
S005-S006	S005	control	3	m	5	161.817	0.252043	59	34	10	1	0	42	3	5	2	50	5
S005-S006	S005	control	3	m	5	84.4315	0.22364	59	34	10	1	0	43	3	5	2	50	5
S005-S006	S005	control	3	m	5	138.145	0.165293	59	34	10	1	0	44	3	5	2	50	5
S005-S006	S005	control	3	m	5	130.711	0.143033	59	34	10	1	0	45	3	5	2	50	5
S005-S006	S005	control	3	m	5	96.5714	0.190589	59	34	10	1	0	46	3	5	2	50	5
S005-S006	S005	control	3	m	5	126.563	0.215671	59	34	10	1	0	47	3	5	2	50	5
S005-S006	S005	control	3	m	5	83.6242	0.240548	59	34	10	1	0	48	3	5	2	50	5
S005-S006	S005	control	3	m	5	84.6773	0.198646	59	34	10	1	0	49	3	5	2	50	5
S005-S006	S005	control	3	m	5	179.48	0.270917	59	34	10	1	0	50	3	5	2	50	5
S005-S006	S005	control	3	m	5	100.218	0.234667	59	34	10	1	0	51	3	5	2	60	5
S005-S006	S005	control	3	m	5	131.714	0.171311	59	34	10	1	0	52	3	5	2	60	5
S005-S006	S005	control	3	m	5	137.084	0.184655	59	34	10	1	0	53	3	5	2	60	5
S005-S006	S005	control	3	m	5	79.3727	0.220593	59	34	10	1	0	54	3	5	2	60	5
S005-S006	S005	control	3	m	5	116.634	0.195961	59	34	10	1	0	55	3	5	2	60	5
S005-S006	S005	control	3	m	5	105.439	0.189654	59	34	10	1	0	56	3	5	2	60	5
S005-S006	S005	control	3	m	5	67.5351	0.16056	59	34	10	1	0	57	3	5	2	60	5
S005-S006	S005	control	3	m	5	122.902	0.181207	59	34	10	1	0	58	3	5	2	60	5
S005-S006	S005	control	3	m	5	99.3021	0.160854	59	34	10	1	0	59	3	5	2	60	5
S005-S006	S005	control	3	m	6	143.267	0.201519	59	34	10	0	0	5	3	5	2	10	6
S005-S006	S005	control	3	m	6	156.119	0.147041	59	34	10	0	0	6	3	5	2	10	6
S005-S006	S005	control	3	m	6	195.124	0.163847	59	34	10	0	0	7	3	5	2	10	6
S005-S006	S005	control	3	m	6	191.25	0.0890337	59	34	10	0	0	8	3	5	2	10	6
S005-S006	S005	control	3	m	6	122.482	0.0818408	59	34	10	0	0	9	3	5	2	10	6
S005-S006	S005	control	3	m	6	180.812	0.138196	59	34	10	0	0	10	3	5	2	10	6
S005-S006	S005	control	3	m	6	142.194	0.142891	59	34	10	0	0	11	3	5	2	20	6
S005-S006	S005	control	3	m	6	141.34	0.104166	59	34	10	0	0	12	3	5	2	20	6
S005-S006	S005	control	3	m	6	150.768	0.232557	59	34	10	0	0	13	3	5	2	20	6
S005-S006	S005	control	3	m	6	119.449	0.172025	59	34	10	0	0	14	3	5	2	20	6
S005-S006	S005	control	3	m	6	107.061	0.0920528	59	34	10	0	0	15	3	5	2	20	6
S005-S006	S005	control	3	m	6	98.8095	0.0894568	59	34	10	0	0	16	3	5	2	20	6
S005-S006	S005	control	3	m	6	138.624	0.106032	59	34	10	1	1	17	3	5	2	20	6
S005-S006	S005	control	3	m	6	160.59	0.113223	59	34	10	1	0	18	3	5	2	20	6
S005-S006	S005	control	3	m	6	143.274	0.136792	59	34	10	1	0	19	3	5	2	20	6
S005-S006	S005	control	3	m	6	94.6214	0.114347	59	34	10	1	0	20	3	5	2	20	6
S005-S006	S005	control	3	m	6	139.615	0.0979229	59	34	10	1	0	21	3	5	2	30	6
S005-S006	S005	control	3	m	6	106.186	0.114206	59	34	10	1	0	22	3	5	2	30	6
S005-S006	S005	control	3	m	6	86.2442	0.140835	59	34	10	1	0	23	3	5	2	30	6
S005-S006	S005	control	3	m	6	160.02	0.230763	59	34	10	1	0	24	3	5	2	30	6
S005-S006	S005	control	3	m	6	78.0543	0.127157	59	34	10	1	0	25	3	5	2	30	6
S005-S006	S005	control	3	m	6	112.726	0.0701933	59	34	10	1	0	26	3	5	2	30	6
S005-S006	S005	control	3	m	6	123.347	0.142352	59	34	10	1	0	27	3	5	2	30	6
S005-S006	S005	control	3	m	6	85.4562	0.146353	59	34	10	1	0	28	3	5	2	30	6
S005-S006	S005	control	3	m	6	124.458	0.101372	59	34	10	1	0	29	3	5	2	30	6
S005-S006	S005	control	3	m	6	105.01	0.0807276	59	34	10	1	0	30	3	5	2	30	6
S005-S006	S005	control	3	m	6	102.204	0.142942	59	34	10	1	0	31	3	5	2	40	6
S005-S006	S005	control	3	m	6	154.234	0.115506	59	34	10	1	0	32	3	5	2	40	6
S005-S006	S005	control	3	m	6	84.1942	0.103684	59	34	10	1	0	33	3	5	2	40	6
S005-S006	S005	control	3	m	6	92.5924	0.0801329	59	34	10	1	0	34	3	5	2	40	6
S005-S006	S005	control	3	m	6	69.147	0.0776711	59	34	10	1	0	35	3	5	2	40	6
S005-S006	S005	control	3	m	6	61.4377	0.0796023	59	34	10	1	0	36	3	5	2	40	6
S005-S006	S005	control	3	m	6	95.6177	0.101152	59	34	10	1	0	37	3	5	2	40	6
S005-S006	S005	control	3	m	6	126.151	0.16909	59	34	10	1	0	38	3	5	2	40	6
S005-S006	S005	control	3	m	6	107.93	0.248666	59	34	10	1	0	39	3	5	2	40	6
S005-S006	S005	control	3	m	6	152.157	0.237384	59	34	10	1	0	40	3	5	2	40	6
S005-S006	S005	control	3	m	6	175.435	0.235439	59	34	10	1	0	41	3	5	2	50	6
S005-S006	S005	control	3	m	6	81.1724	0.211277	59	34	10	1	0	42	3	5	2	50	6
S005-S006	S005	control	3	m	6	118.271	0.135427	59	34	10	1	0	43	3	5	2	50	6
S005-S006	S005	control	3	m	6	84.9659	0.104313	59	34	10	1	0	44	3	5	2	50	6
S005-S006	S005	control	3	m	6	108.203	0.0695597	59	34	10	1	0	45	3	5	2	50	6
S005-S006	S005	control	3	m	6	163.27	0.180104	59	34	10	1	0	46	3	5	2	50	6
S005-S006	S005	control	3	m	6	109.506	0.122429	59	34	10	1	0	47	3	5	2	50	6
S005-S006	S005	control	3	m	6	105.759	0.167917	59	34	10	1	0	48	3	5	2	50	6
S005-S006	S005	control	3	m	6	125.208	0.159538	59	34	10	1	0	49	3	5	2	50	6
S005-S006	S005	control	3	m	6	100.431	0.118502	59	34	10	1	0	50	3	5	2	50	6
S005-S006	S005	control	3	m	6	116.396	0.184787	59	34	10	1	0	51	3	5	2	60	6
S005-S006	S005	control	3	m	6	122.776	0.122047	59	34	10	1	0	52	3	5	2	60	6
S005-S006	S005	control	3	m	6	88.4685	0.148416	59	34	10	1	0	53	3	5	2	60	6
S005-S006	S005	control	3	m	6	107.982	0.126923	59	34	10	1	0	54	3	5	2	60	6
S005-S006	S005	control	3	m	6	104.601	0.0902017	59	34	10	1	0	55	3	5	2	60	6
S005-S006	S005	control	3	m	6	103.398	0.171245	59	34	10	1	0	56	3	5	2	60	6
S005-S006	S005	control	3	m	6	157.648	0.206681	59	34	10	1	0	57	3	5	2	60	6
S005-S006	S005	control	3	m	6	75.4698	0.0850331	59	34	10	1	0	58	3	5	2	60	6
S005-S006	S005	control	3	m	6	97.9708	0.104486	59	34	10	1	0	59	3	5	2	60	6
S005-S006	S006	control	3	f	1	169.335	0.329659	74	29	10	0	0	5	3	6	1	10	1
S005-S006	S006	control	3	f	1	148.795	0.316093	74	29	10	0	0	6	3	6	1	10	1
S005-S006	S006	control	3	f	1	93.2318	0.165918	74	29	10	0	0	7	3	6	1	10	1
S005-S006	S006	control	3	f	1	141.799	0.207799	74	29	10	0	0	8	3	6	1	10	1
S005-S006	S006	control	3	f	1	60.5208	0.108983	74	29	10	0	0	9	3	6	1	10	1
S005-S006	S006	control	3	f	1	109.892	0.216399	74	29	10	1	1	10	3	6	1	10	1
S005-S006	S006	control	3	f	1	111.227	0.182134	74	29	10	1	0	11	3	6	1	20	1
S005-S006	S006	control	3	f	1	69.301	0.174781	74	29	10	1	0	12	3	6	1	20	1
S005-S006	S006	control	3	f	1	93.1646	0.144152	74	29	10	1	0	13	3	6	1	20	1
S005-S006	S006	control	3	f	1	67.784	0.0895193	74	29	10	1	0	14	3	6	1	20	1
S005-S006	S006	control	3	f	1	59.0165	0.166484	74	29	10	1	0	15	3	6	1	20	1
S005-S006	S006	control	3	f	1	111.398	0.106366	74	29	10	1	0	16	3	6	1	20	1
S005-S006	S006	control	3	f	1	85.5519	0.127087	74	29	10	1	0	17	3	6	1	20	1
S005-S006	S006	control	3	f	1	49.2474	0.0732636	74	29	10	1	0	18	3	6	1	20	1
S005-S006	S006	control	3	f	1	68.7087	0.0744296	74	29	10	1	0	19	3	6	1	20	1
S005-S006	S006	control	3	f	1	75.6355	0.12508	74	29	10	1	0	20	3	6	1	20	1
S005-S006	S006	control	3	f	1	53.3247	0.125075	74	29	10	1	0	21	3	6	1	30	1
S005-S006	S006	control	3	f	1	96.2429	0.190347	74	29	10	1	0	22	3	6	1	30	1
S005-S006	S006	control	3	f	1	62.0562	0.117004	74	29	10	1	0	23	3	6	1	30	1
S005-S006	S006	control	3	f	1	51.9102	0.0868808	74	29	10	1	0	24	3	6	1	30	1
S005-S006	S006	control	3	f	1	79.9467	0.0798246	74	29	10	1	0	25	3	6	1	30	1
S005-S006	S006	control	3	f	1	51.3916	0.0925887	74	29	10	1	0	26	3	6	1	30	1
S005-S006	S006	control	3	f	1	49.4114	0.0861253	74	29	10	1	0	27	3	6	1	30	1
S005-S006	S006	control	3	f	1	83.3869	0.098985	74	29	10	1	0	28	3	6	1	30	1
S005-S006	S006	control	3	f	1	72.7158	0.0892463	74	29	10	1	0	29	3	6	1	30	1
S005-S006	S006	control	3	f	1	54.5323	0.0760271	74	29	10	1	0	30	3	6	1	30	1
S005-S006	S006	control	3	f	1	80.1136	0.0791887	74	29	10	1	0	31	3	6	1	40	1
S005-S006	S006	control	3	f	1	52.8537	0.061955	74	29	10	1	0	32	3	6	1	40	1
S005-S006	S006	control	3	f	1	62.3831	0.0684639	74	29	10	1	0	33	3	6	1	40	1
S005-S006	S006	control	3	f	1	48.1471	0.0633071	74	29	10	1	0	34	3	6	1	40	1
S005-S006	S006	control	3	f	1	65.5845	0.0928853	74	29	10	1	0	35	3	6	1	40	1
S005-S006	S006	control	3	f	1	72.3815	0.0886491	74	29	10	1	0	36	3	6	1	40	1
S005-S006	S006	control	3	f	1	85.2576	0.0743671	74	29	10	1	0	37	3	6	1	40	1
S005-S006	S006	control	3	f	1	56.8133	0.104389	74	29	10	1	0	38	3	6	1	40	1
S005-S006	S006	control	3	f	1	115.175	0.18655	74	29	10	1	0	39	3	6	1	40	1
S005-S006	S006	control	3	f	1	66.077	0.143116	74	29	10	1	0	40	3	6	1	40	1
S005-S006	S006	control	3	f	1	69.5242	0.0783194	74	29	10	1	0	41	3	6	1	50	1
S005-S006	S006	control	3	f	1	94.1804	0.0775166	74	29	10	1	0	42	3	6	1	50	1
S005-S006	S006	control	3	f	1	37.4086	0.100399	74	29	10	1	0	43	3	6	1	50	1
S005-S006	S006	control	3	f	1	81.9078	0.111541	74	29	10	1	0	44	3	6	1	50	1
S005-S006	S006	control	3	f	1	59.019	0.122061	74	29	10	1	0	45	3	6	1	50	1
S005-S006	S006	control	3	f	1	64.5391	0.085715	74	29	10	1	0	46	3	6	1	50	1
S005-S006	S006	control	3	f	1	50.4395	0.0979056	74	29	10	1	0	47	3	6	1	50	1
S005-S006	S006	control	3	f	1	36.6993	0.110111	74	29	10	1	0	48	3	6	1	50	1
S005-S006	S006	control	3	f	1	65.3525	0.0773997	74	29	10	1	0	49	3	6	1	50	1
S005-S006	S006	control	3	f	1	47.9327	0.0857502	74	29	10	1	0	50	3	6	1	50	1
S005-S006	S006	control	3	f	1	59.8979	0.097315	74	29	10	1	0	51	3	6	1	60	1
S005-S006	S006	control	3	f	1	43.8201	0.0853631	74	29	10	1	0	52	3	6	1	60	1
S005-S006	S006	control	3	f	1	77.9738	0.172453	74	29	10	1	0	53	3	6	1	60	1
S005-S006	S006	control	3	f	1	58.1676	0.112782	74	29	10	1	0	54	3	6	1	60	1
S005-S006	S006	control	3	f	1	71.5938	0.116071	74	29	10	1	0	55	3	6	1	60	1
S005-S006	S006	control	3	f	1	63.7831	0.109485	74	29	10	1	0	56	3	6	1	60	1
S005-S006	S006	control	3	f	1	119.175	0.185834	74	29	10	1	0	57	3	6	1	60	1
S005-S006	S006	control	3	f	1	71.8039	0.0758749	74	29	10	1	0	58	3	6	1	60	1
S005-S006	S006	control	3	f	1			74	29	10	0	0	59	3	6	1	60	1
S005-S006	S006	control	3	f	2	273.866	0.304069	74	29	10	0	0	5	3	6	1	10	2
S005-S006	S006	control	3	f	2	115.805	0.137631	74	29	10	0	0	6	3	6	1	10	2
S005-S006	S006	control	3	f	2	89.6318	0.119276	74	29	10	0	0	7	3	6	1	10	2
S005-S006	S006	control	3	f	2	75.933	0.150336	74	29	10	0	0	8	3	6	1	10	2
S005-S006	S006	control	3	f	2	111.17	0.118174	74	29	10	0	0	9	3	6	1	10	2
S005-S006	S006	control	3	f	2	103.444	0.146132	74	29	10	0	0	10	3	6	1	10	2
S005-S006	S006	control	3	f	2	123.473	0.138669	74	29	10	0	0	11	3	6	1	20	2
S005-S006	S006	control	3	f	2	101.926	0.201623	74	29	10	1	1	12	3	6	1	20	2
S005-S006	S006	control	3	f	2	120.531	0.234276	74	29	10	1	0	13	3	6	1	20	2
S005-S006	S006	control	3	f	2	123.813	0.176203	74	29	10	1	0	14	3	6	1	20	2
S005-S006	S006	control	3	f	2	94.1128	0.157974	74	29	10	1	0	15	3	6	1	20	2
S005-S006	S006	control	3	f	2	100.577	0.107499	74	29	10	1	0	16	3	6	1	20	2
S005-S006	S006	control	3	f	2	75.5161	0.133102	74	29	10	1	0	17	3	6	1	20	2
S005-S006	S006	control	3	f	2	87.7255	0.167713	74	29	10	1	0	18	3	6	1	20	2
S005-S006	S006	control	3	f	2	119.183	0.147456	74	29	10	1	0	19	3	6	1	20	2
S005-S006	S006	control	3	f	2	69.8717	0.120275	74	29	10	1	0	20	3	6	1	20	2
S005-S006	S006	control	3	f	2	98.4781	0.122414	74	29	10	1	0	21	3	6	1	30	2
S005-S006	S006	control	3	f	2	102.825	0.182168	74	29	10	1	0	22	3	6	1	30	2
S005-S006	S006	control	3	f	2	87.9236	0.250965	74	29	10	1	0	23	3	6	1	30	2
S005-S006	S006	control	3	f	2	117.615	0.276397	74	29	10	1	0	24	3	6	1	30	2
S005-S006	S006	control	3	f	2	97.5021	0.266455	74	29	10	1	0	25	3	6	1	30	2
S005-S006	S006	control	3	f	2	93.1091	0.212513	74	29	10	1	0	26	3	6	1	30	2
S005-S006	S006	control	3	f	2	81.2304	0.168743	74	29	10	1	0	27	3	6	1	30	2
S005-S006	S006	control	3	f	2	74.8357	0.123626	74	29	10	1	0	28	3	6	1	30	2
S005-S006	S006	control	3	f	2	84.17	0.125526	74	29	10	1	0	29	3	6	1	30	2
S005-S006	S006	control	3	f	2	73.0345	0.145659	74	29	10	1	0	30	3	6	1	30	2
S005-S006	S006	control	3	f	2	96.2829	0.121067	74	29	10	1	0	31	3	6	1	40	2
S005-S006	S006	control	3	f	2	87.398	0.165823	74	29	10	1	0	32	3	6	1	40	2
S005-S006	S006	control	3	f	2	123.006	0.286332	74	29	10	1	0	33	3	6	1	40	2
S005-S006	S006	control	3	f	2	86.9303	0.208603	74	29	10	1	0	34	3	6	1	40	2
S005-S006	S006	control	3	f	2	85.2743	0.205097	74	29	10	1	0	35	3	6	1	40	2
S005-S006	S006	control	3	f	2	71.3699	0.154348	74	29	10	1	0	36	3	6	1	40	2
S005-S006	S006	control	3	f	2	78.2077	0.175796	74	29	10	1	0	37	3	6	1	40	2
S005-S006	S006	control	3	f	2	73.1709	0.117645	74	29	10	1	0	38	3	6	1	40	2
S005-S006	S006	control	3	f	2	81.9465	0.0780091	74	29	10	1	0	39	3	6	1	40	2
S005-S006	S006	control	3	f	2	93.5504	0.159905	74	29	10	1	0	40	3	6	1	40	2
S005-S006	S006	control	3	f	2	108.402	0.235221	74	29	10	1	0	41	3	6	1	50	2
S005-S006	S006	control	3	f	2	119.346	0.261063	74	29	10	1	0	42	3	6	1	50	2
S005-S006	S006	control	3	f	2	111.844	0.245619	74	29	10	1	0	43	3	6	1	50	2
S005-S006	S006	control	3	f	2	134.023	0.200713	74	29	10	1	0	44	3	6	1	50	2
S005-S006	S006	control	3	f	2	121.072	0.213214	74	29	10	1	0	45	3	6	1	50	2
S005-S006	S006	control	3	f	2	92.6654	0.185337	74	29	10	1	0	46	3	6	1	50	2
S005-S006	S006	control	3	f	2	110.383	0.243539	74	29	10	1	0	47	3	6	1	50	2
S005-S006	S006	control	3	f	2	145.626	0.311619	74	29	10	1	0	48	3	6	1	50	2
S005-S006	S006	control	3	f	2	95.1471	0.300421	74	29	10	1	0	49	3	6	1	50	2
S005-S006	S006	control	3	f	2	119.248	0.209038	74	29	10	1	0	50	3	6	1	50	2
S005-S006	S006	control	3	f	2	74.3336	0.160052	74	29	10	1	0	51	3	6	1	60	2
S005-S006	S006	control	3	f	2	115.872	0.211803	74	29	10	1	0	52	3	6	1	60	2
S005-S006	S006	control	3	f	2	110.327	0.174853	74	29	10	1	0	53	3	6	1	60	2
S005-S006	S006	control	3	f	2	122.025	0.279825	74	29	10	1	0	54	3	6	1	60	2
S005-S006	S006	control	3	f	2	150.601	0.319002	74	29	10	1	0	55	3	6	1	60	2
S005-S006	S006	control	3	f	2	82.7944	0.184525	74	29	10	1	0	56	3	6	1	60	2
S005-S006	S006	control	3	f	2	111.212	0.157011	74	29	10	1	0	57	3	6	1	60	2
S005-S006	S006	control	3	f	2	91.8385	0.1531	74	29	10	1	0	58	3	6	1	60	2
S005-S006	S006	control	3	f	2	103.422	0.128069	74	29	10	1	0	59	3	6	1	60	2
S005-S006	S006	control	3	f	3	143.048	0.117669	74	29	10	0	0	5	3	6	1	10	3
S005-S006	S006	control	3	f	3	160.937	0.147899	74	29	10	0	0	6	3	6	1	10	3
S005-S006	S006	control	3	f	3	120.849	0.24823	74	29	10	0	0	7	3	6	1	10	3
S005-S006	S006	control	3	f	3	171.8	0.199498	74	29	10	0	0	8	3	6	1	10	3
S005-S006	S006	control	3	f	3	109.965	0.221744	74	29	10	0	0	9	3	6	1	10	3
S005-S006	S006	control	3	f	3	148.543	0.159725	74	29	10	0	0	10	3	6	1	10	3
S005-S006	S006	control	3	f	3	76.4376	0.214732	74	29	10	0	0	11	3	6	1	20	3
S005-S006	S006	control	3	f	3	144.76	0.160457	74	29	10	0	0	12	3	6	1	20	3
S005-S006	S006	control	3	f	3	88.8367	0.175154	74	29	10	1	1	13	3	6	1	20	3
S005-S006	S006	control	3	f	3	105.304	0.161528	74	29	10	1	0	14	3	6	1	20	3
S005-S006	S006	control	3	f	3	122.557	0.225442	74	29	10	1	0	15	3	6	1	20	3
S005-S006	S006	control	3	f	3	120.457	0.191015	74	29	10	1	0	16	3	6	1	20	3
S005-S006	S006	control	3	f	3	109.059	0.172335	74	29	10	1	0	17	3	6	1	20	3
S005-S006	S006	control	3	f	3	100.014	0.204754	74	29	10	1	0	18	3	6	1	20	3
S005-S006	S006	control	3	f	3	71.6202	0.138428	74	29	10	1	0	19	3	6	1	20	3
S005-S006	S006	control	3	f	3	80.1185	0.188714	74	29	10	1	0	20	3	6	1	20	3
S005-S006	S006	control	3	f	3	106.589	0.190528	74	29	10	1	0	21	3	6	1	30	3
S005-S006	S006	control	3	f	3	79.613	0.189115	74	29	10	1	0	22	3	6	1	30	3
S005-S006	S006	control	3	f	3	81.5898	0.153769	74	29	10	1	0	23	3	6	1	30	3
S005-S006	S006	control	3	f	3	83.7377	0.200449	74	29	10	1	0	24	3	6	1	30	3
S005-S006	S006	control	3	f	3	82.2489	0.13415	74	29	10	1	0	25	3	6	1	30	3
S005-S006	S006	control	3	f	3	85.0522	0.177803	74	29	10	1	0	26	3	6	1	30	3
S005-S006	S006	control	3	f	3	76.2287	0.143133	74	29	10	1	0	27	3	6	1	30	3
S005-S006	S006	control	3	f	3	79.9616	0.15425	74	29	10	1	0	28	3	6	1	30	3
S005-S006	S006	control	3	f	3	91.1974	0.125728	74	29	10	1	0	29	3	6	1	30	3
S005-S006	S006	control	3	f	3	61.4512	0.182842	74	29	10	1	0	30	3	6	1	30	3
S005-S006	S006	control	3	f	3	110.001	0.0955485	74	29	10	1	0	31	3	6	1	40	3
S005-S006	S006	control	3	f	3	54.1078	0.145889	74	29	10	1	0	32	3	6	1	40	3
S005-S006	S006	control	3	f	3	80.3582	0.140464	74	29	10	1	0	33	3	6	1	40	3
S005-S006	S006	control	3	f	3	96.2625	0.219756	74	29	10	1	0	34	3	6	1	40	3
S005-S006	S006	control	3	f	3	66.2964	0.12205	74	29	10	1	0	35	3	6	1	40	3
S005-S006	S006	control	3	f	3	51.355	0.0940507	74	29	10	1	0	36	3	6	1	40	3
S005-S006	S006	control	3	f	3	64.9797	0.105096	74	29	10	1	0	37	3	6	1	40	3
S005-S006	S006	control	3	f	3	70.6869	0.121748	74	29	10	1	0	38	3	6	1	40	3
S005-S006	S006	control	3	f	3	80.0926	0.146159	74	29	10	1	0	39	3	6	1	40	3
S005-S006	S006	control	3	f	3	67.5261	0.173175	74	29	10	1	0	40	3	6	1	40	3
S005-S006	S006	control	3	f	3	96.1826	0.215649	74	29	10	1	0	41	3	6	1	50	3
S005-S006	S006	control	3	f	3	82.2663	0.103822	74	29	10	1	0	42	3	6	1	50	3
S005-S006	S006	control	3	f	3	83.3698	0.154034	74	29	10	1	0	43	3	6	1	50	3
S005-S006	S006	control	3	f	3	78.7235	0.120143	74	29	10	1	0	44	3	6	1	50	3
S005-S006	S006	control	3	f	3	70.3828	0.161539	74	29	10	1	0	45	3	6	1	50	3
S005-S006	S006	control	3	f	3	58.9623	0.096027	74	29	10	1	0	46	3	6	1	50	3
S005-S006	S006	control	3	f	3	60.1044	0.100171	74	29	10	1	0	47	3	6	1	50	3
S005-S006	S006	control	3	f	3	67.5833	0.129856	74	29	10	1	0	48	3	6	1	50	3
S005-S006	S006	control	3	f	3	69.619	0.123729	74	29	10	1	0	49	3	6	1	50	3
S005-S006	S006	control	3	f	3	88.8672	0.207468	74	29	10	1	0	50	3	6	1	50	3
S005-S006	S006	control	3	f	3	74.6308	0.195371	74	29	10	1	0	51	3	6	1	60	3
S005-S006	S006	control	3	f	3	73.1352	0.186194	74	29	10	1	0	52	3	6	1	60	3
S005-S006	S006	control	3	f	3	74.8055	0.125518	74	29	10	1	0	53	3	6	1	60	3
S005-S006	S006	control	3	f	3	72.7507	0.144277	74	29	10	1	0	54	3	6	1	60	3
S005-S006	S006	control	3	f	3	60.9637	0.132056	74	29	10	1	0	55	3	6	1	60	3
S005-S006	S006	control	3	f	3	77.3047	0.171384	74	29	10	1	0	56	3	6	1	60	3
S005-S006	S006	control	3	f	3	79.1227	0.185253	74	29	10	1	0	57	3	6	1	60	3
S005-S006	S006	control	3	f	3	133.955	0.236593	74	29	10	1	0	58	3	6	1	60	3
S005-S006	S006	control	3	f	3	102.712	0.152562	74	29	10	1	0	59	3	6	1	60	3
S005-S006	S006	control	3	f	4	186.071	0.235429	74	29	10	0	0	5	3	6	1	10	4
S005-S006	S006	control	3	f	4	102.753	0.159575	74	29	10	0	0	6	3	6	1	10	4
S005-S006	S006	control	3	f	4	121.503	0.119846	74	29	10	0	0	7	3	6	1	10	4
S005-S006	S006	control	3	f	4	71.7406	0.243371	74	29	10	0	0	8	3	6	1	10	4
S005-S006	S006	control	3	f	4	158.366	0.127418	74	29	10	1	1	9	3	6	1	10	4
S005-S006	S006	control	3	f	4	62.9507	0.190154	74	29	10	1	0	10	3	6	1	10	4
S005-S006	S006	control	3	f	4	101.585	0.145514	74	29	10	1	0	11	3	6	1	20	4
S005-S006	S006	control	3	f	4	58.0369	0.163112	74	29	10	1	0	12	3	6	1	20	4
S005-S006	S006	control	3	f	4	111.329	0.13067	74	29	10	1	0	13	3	6	1	20	4
S005-S006	S006	control	3	f	4	109.785	0.180373	74	29	10	1	0	14	3	6	1	20	4
S005-S006	S006	control	3	f	4	72.2191	0.17295	74	29	10	1	0	15	3	6	1	20	4
S005-S006	S006	control	3	f	4	81.8206	0.131266	74	29	10	1	0	16	3	6	1	20	4
S005-S006	S006	control	3	f	4	72.5946	0.158493	74	29	10	1	0	17	3	6	1	20	4
S005-S006	S006	control	3	f	4	109.166	0.090384	74	29	10	1	0	18	3	6	1	20	4
S005-S006	S006	control	3	f	4	48.8494	0.126442	74	29	10	1	0	19	3	6	1	20	4
S005-S006	S006	control	3	f	4	63.8714	0.137792	74	29	10	1	0	20	3	6	1	20	4
S005-S006	S006	control	3	f	4	45.9618	0.1122	74	29	10	1	0	21	3	6	1	30	4
S005-S006	S006	control	3	f	4	70.8418	0.12149	74	29	10	1	0	22	3	6	1	30	4
S005-S006	S006	control	3	f	4	59.5623	0.133172	74	29	10	1	0	23	3	6	1	30	4
S005-S006	S006	control	3	f	4	56.3024	0.103792	74	29	10	1	0	24	3	6	1	30	4
S005-S006	S006	control	3	f	4	43.5852	0.109403	74	29	10	1	0	25	3	6	1	30	4
S005-S006	S006	control	3	f	4	80.5659	0.169138	74	29	10	1	0	26	3	6	1	30	4
S005-S006	S006	control	3	f	4	61.4011	0.115457	74	29	10	1	0	27	3	6	1	30	4
S005-S006	S006	control	3	f	4	56.3317	0.138831	74	29	10	1	0	28	3	6	1	30	4
S005-S006	S006	control	3	f	4	82.8525	0.153391	74	29	10	1	0	29	3	6	1	30	4
S005-S006	S006	control	3	f	4	63.2694	0.122556	74	29	10	1	0	30	3	6	1	30	4
S005-S006	S006	control	3	f	4	56.379	0.108922	74	29	10	1	0	31	3	6	1	40	4
S005-S006	S006	control	3	f	4	70.3379	0.131008	74	29	10	1	0	32	3	6	1	40	4
S005-S006	S006	control	3	f	4	73.5067	0.126134	74	29	10	1	0	33	3	6	1	40	4
S005-S006	S006	control	3	f	4	65.1572	0.0963247	74	29	10	1	0	34	3	6	1	40	4
S005-S006	S006	control	3	f	4	59.7805	0.134549	74	29	10	1	0	35	3	6	1	40	4
S005-S006	S006	control	3	f	4	70.4515	0.106642	74	29	10	1	0	36	3	6	1	40	4
S005-S006	S006	control	3	f	4	49.7555	0.128119	74	29	10	1	0	37	3	6	1	40	4
S005-S006	S006	control	3	f	4	65.7285	0.109762	74	29	10	1	0	38	3	6	1	40	4
S005-S006	S006	control	3	f	4	60.1308	0.148281	74	29	10	1	0	39	3	6	1	40	4
S005-S006	S006	control	3	f	4	95.4373	0.166754	74	29	10	1	0	40	3	6	1	40	4
S005-S006	S006	control	3	f	4	55.8841	0.101157	74	29	10	1	0	41	3	6	1	50	4
S005-S006	S006	control	3	f	4	62.424	0.0904432	74	29	10	1	0	42	3	6	1	50	4
S005-S006	S006	control	3	f	4	78.4966	0.106515	74	29	10	1	0	43	3	6	1	50	4
S005-S006	S006	control	3	f	4	88.8703	0.123532	74	29	10	1	0	44	3	6	1	50	4
S005-S006	S006	control	3	f	4	105.696	0.103	74	29	10	1	0	45	3	6	1	50	4
S005-S006	S006	control	3	f	4	107.887	0.117558	74	29	10	1	0	46	3	6	1	50	4
S005-S006	S006	control	3	f	4	95.388	0.108642	74	29	10	1	0	47	3	6	1	50	4
S005-S006	S006	control	3	f	4	122.03	0.155767	74	29	10	1	0	48	3	6	1	50	4
S005-S006	S006	control	3	f	4	99.8409	0.178914	74	29	10	1	0	49	3	6	1	50	4
S005-S006	S006	control	3	f	4	52.1522	0.159632	74	29	10	1	0	50	3	6	1	50	4
S005-S006	S006	control	3	f	4	72.7599	0.106673	74	29	10	1	0	51	3	6	1	60	4
S005-S006	S006	control	3	f	4	66.9936	0.0879678	74	29	10	1	0	52	3	6	1	60	4
S005-S006	S006	control	3	f	4	63.7888	0.167087	74	29	10	1	0	53	3	6	1	60	4
S005-S006	S006	control	3	f	4	56.4624	0.110612	74	29	10	1	0	54	3	6	1	60	4
S005-S006	S006	control	3	f	4	60.8554	0.143025	74	29	10	1	0	55	3	6	1	60	4
S005-S006	S006	control	3	f	4	97.3937	0.165794	74	29	10	1	0	56	3	6	1	60	4
S005-S006	S006	control	3	f	4	90.3598	0.20494	74	29	10	1	0	57	3	6	1	60	4
S005-S006	S006	control	3	f	4	84.3861	0.172634	74	29	10	1	0	58	3	6	1	60	4
S005-S006	S006	control	3	f	4	56.4421	0.192878	74	29	10	1	0	59	3	6	1	60	4
S005-S006	S006	control	3	f	5	202.434	0.47294	74	29	10	0	0	5	3	6	1	10	5
S005-S006	S006	control	3	f	5	222.503	0.337759	74	29	10	0	0	6	3	6	1	10	5
S005-S006	S006	control	3	f	5	101.138	0.195817	74	29	10	0	0	7	3	6	1	10	5
S005-S006	S006	control	3	f	5	157.29	0.188016	74	29	10	0	0	8	3	6	1	10	5
S005-S006	S006	control	3	f	5	102.739	0.123651	74	29	10	0	0	9	3	6	1	10	5
S005-S006	S006	control	3	f	5	158.479	0.164556	74	29	10	0	0	10	3	6	1	10	5
S005-S006	S006	control	3	f	5	95.8577	0.157879	74	29	10	0	0	11	3	6	1	20	5
S005-S006	S006	control	3	f	5	134.445	0.113672	74	29	10	0	0	12	3	6	1	20	5
S005-S006	S006	control	3	f	5	134.885	0.149096	74	29	10	1	1	13	3	6	1	20	5
S005-S006	S006	control	3	f	5	105.949	0.11849	74	29	10	1	0	14	3	6	1	20	5
S005-S006	S006	control	3	f	5	137.743	0.133689	74	29	10	1	0	15	3	6	1	20	5
S005-S006	S006	control	3	f	5	135.794	0.114697	74	29	10	1	0	16	3	6	1	20	5
S005-S006	S006	control	3	f	5	130.518	0.195594	74	29	10	1	0	17	3	6	1	20	5
S005-S006	S006	control	3	f	5	137.389	0.163648	74	29	10	1	0	18	3	6	1	20	5
S005-S006	S006	control	3	f	5	128.069	0.199232	74	29	10	1	0	19	3	6	1	20	5
S005-S006	S006	control	3	f	5	175.625	0.191888	74	29	10	1	0	20	3	6	1	20	5
S005-S006	S006	control	3	f	5	120.761	0.17745	74	29	10	1	0	21	3	6	1	30	5
S005-S006	S006	control	3	f	5	141.935	0.126843	74	29	10	1	0	22	3	6	1	30	5
S005-S006	S006	control	3	f	5	139.132	0.152177	74	29	10	1	0	23	3	6	1	30	5
S005-S006	S006	control	3	f	5	89.1886	0.12307	74	29	10	1	0	24	3	6	1	30	5
S005-S006	S006	control	3	f	5	150.183	0.220733	74	29	10	1	0	25	3	6	1	30	5
S005-S006	S006	control	3	f	5	81.5949	0.216176	74	29	10	1	0	26	3	6	1	30	5
S005-S006	S006	control	3	f	5	110.771	0.19965	74	29	10	1	0	27	3	6	1	30	5
S005-S006	S006	control	3	f	5	169.877	0.272597	74	29	10	1	0	28	3	6	1	30	5
S005-S006	S006	control	3	f	5	74.108	0.229301	74	29	10	1	0	29	3	6	1	30	5
S005-S006	S006	control	3	f	5	130.672	0.179308	74	29	10	1	0	30	3	6	1	30	5
S005-S006	S006	control	3	f	5	123.526	0.161725	74	29	10	1	0	31	3	6	1	40	5
S005-S006	S006	control	3	f	5	108.704	0.176491	74	29	10	1	0	32	3	6	1	40	5
S005-S006	S006	control	3	f	5	132.86	0.209764	74	29	10	1	0	33	3	6	1	40	5
S005-S006	S006	control	3	f	5	157.592	0.223194	74	29	10	1	0	34	3	6	1	40	5
S005-S006	S006	control	3	f	5	101.723	0.160799	74	29	10	1	0	35	3	6	1	40	5
S005-S006	S006	control	3	f	5	138.874	0.206249	74	29	10	1	0	36	3	6	1	40	5
S005-S006	S006	control	3	f	5	84.3564	0.234528	74	29	10	1	0	37	3	6	1	40	5
S005-S006	S006	control	3	f	5	150.074	0.260521	74	29	10	1	0	38	3	6	1	40	5
S005-S006	S006	control	3	f	5	162.745	0.279172	74	29	10	1	0	39	3	6	1	40	5
S005-S006	S006	control	3	f	5	100.75	0.321844	74	29	10	1	0	40	3	6	1	40	5
S005-S006	S006	control	3	f	5	169.992	0.276795	74	29	10	1	0	41	3	6	1	50	5
S005-S006	S006	control	3	f	5	161.817	0.252043	74	29	10	1	0	42	3	6	1	50	5
S005-S006	S006	control	3	f	5	84.4315	0.22364	74	29	10	1	0	43	3	6	1	50	5
S005-S006	S006	control	3	f	5	138.145	0.165293	74	29	10	1	0	44	3	6	1	50	5
S005-S006	S006	control	3	f	5	130.711	0.143033	74	29	10	1	0	45	3	6	1	50	5
S005-S006	S006	control	3	f	5	96.5714	0.190589	74	29	10	1	0	46	3	6	1	50	5
S005-S006	S006	control	3	f	5	126.563	0.215671	74	29	10	1	0	47	3	6	1	50	5
S005-S006	S006	control	3	f	5	83.6242	0.240548	74	29	10	1	0	48	3	6	1	50	5
S005-S006	S006	control	3	f	5	84.6773	0.198646	74	29	10	1	0	49	3	6	1	50	5
S005-S006	S006	control	3	f	5	179.48	0.270917	74	29	10	1	0	50	3	6	1	50	5
S005-S006	S006	control	3	f	5	100.218	0.234667	74	29	10	1	0	51	3	6	1	60	5
S005-S006	S006	control	3	f	5	131.714	0.171311	74	29	10	1	0	52	3	6	1	60	5
S005-S006	S006	control	3	f	5	137.084	0.184655	74	29	10	1	0	53	3	6	1	60	5
S005-S006	S006	control	3	f	5	79.3727	0.220593	74	29	10	1	0	54	3	6	1	60	5
S005-S006	S006	control	3	f	5	116.634	0.195961	74	29	10	1	0	55	3	6	1	60	5
S005-S006	S006	control	3	f	5	105.439	0.189654	74	29	10	1	0	56	3	6	1	60	5
S005-S006	S006	control	3	f	5	67.5351	0.16056	74	29	10	1	0	57	3	6	1	60	5
S005-S006	S006	control	3	f	5	122.902	0.181207	74	29	10	1	0	58	3	6	1	60	5
S005-S006	S006	control	3	f	5	99.3021	0.160854	74	29	10	1	0	59	3	6	1	60	5
S005-S006	S006	control	3	f	6	143.267	0.201519	74	29	10	0	0	5	3	6	1	10	6
S005-S006	S006	control	3	f	6	156.119	0.147041	74	29	10	0	0	6	3	6	1	10	6
S005-S006	S006	control	3	f	6	195.124	0.163847	74	29	10	0	0	7	3	6	1	10	6
S005-S006	S006	control	3	f	6	191.25	0.0890337	74	29	10	0	0	8	3	6	1	10	6
S005-S006	S006	control	3	f	6	122.482	0.0818408	74	29	10	0	0	9	3	6	1	10	6
S005-S006	S006	control	3	f	6	180.812	0.138196	74	29	10	0	0	10	3	6	1	10	6
S005-S006	S006	control	3	f	6	142.194	0.142891	74	29	10	1	1	11	3	6	1	20	6
S005-S006	S006	control	3	f	6	141.34	0.104166	74	29	10	1	0	12	3	6	1	20	6
S005-S006	S006	control	3	f	6	150.768	0.232557	74	29	10	1	0	13	3	6	1	20	6
S005-S006	S006	control	3	f	6	119.449	0.172025	74	29	10	1	0	14	3	6	1	20	6
S005-S006	S006	control	3	f	6	107.061	0.0920528	74	29	10	1	0	15	3	6	1	20	6
S005-S006	S006	control	3	f	6	98.8095	0.0894568	74	29	10	1	0	16	3	6	1	20	6
S005-S006	S006	control	3	f	6	138.624	0.106032	74	29	10	1	0	17	3	6	1	20	6
S005-S006	S006	control	3	f	6	160.59	0.113223	74	29	10	1	0	18	3	6	1	20	6
S005-S006	S006	control	3	f	6	143.274	0.136792	74	29	10	1	0	19	3	6	1	20	6
S005-S006	S006	control	3	f	6	94.6214	0.114347	74	29	10	1	0	20	3	6	1	20	6
S005-S006	S006	control	3	f	6	139.615	0.0979229	74	29	10	1	0	21	3	6	1	30	6
S005-S006	S006	control	3	f	6	106.186	0.114206	74	29	10	1	0	22	3	6	1	30	6
S005-S006	S006	control	3	f	6	86.2442	0.140835	74	29	10	1	0	23	3	6	1	30	6
S005-S006	S006	control	3	f	6	160.02	0.230763	74	29	10	1	0	24	3	6	1	30	6
S005-S006	S006	control	3	f	6	78.0543	0.127157	74	29	10	1	0	25	3	6	1	30	6
S005-S006	S006	control	3	f	6	112.726	0.0701933	74	29	10	1	0	26	3	6	1	30	6
S005-S006	S006	control	3	f	6	123.347	0.142352	74	29	10	1	0	27	3	6	1	30	6
S005-S006	S006	control	3	f	6	85.4562	0.146353	74	29	10	1	0	28	3	6	1	30	6
S005-S006	S006	control	3	f	6	124.458	0.101372	74	29	10	1	0	29	3	6	1	30	6
S005-S006	S006	control	3	f	6	105.01	0.0807276	74	29	10	1	0	30	3	6	1	30	6
S005-S006	S006	control	3	f	6	102.204	0.142942	74	29	10	1	0	31	3	6	1	40	6
S005-S006	S006	control	3	f	6	154.234	0.115506	74	29	10	1	0	32	3	6	1	40	6
S005-S006	S006	control	3	f	6	84.1942	0.103684	74	29	10	1	0	33	3	6	1	40	6
S005-S006	S006	control	3	f	6	92.5924	0.0801329	74	29	10	1	0	34	3	6	1	40	6
S005-S006	S006	control	3	f	6	69.147	0.0776711	74	29	10	1	0	35	3	6	1	40	6
S005-S006	S006	control	3	f	6	61.4377	0.0796023	74	29	10	1	0	36	3	6	1	40	6
S005-S006	S006	control	3	f	6	95.6177	0.101152	74	29	10	1	0	37	3	6	1	40	6
S005-S006	S006	control	3	f	6	126.151	0.16909	74	29	10	1	0	38	3	6	1	40	6
S005-S006	S006	control	3	f	6	107.93	0.248666	74	29	10	1	0	39	3	6	1	40	6
S005-S006	S006	control	3	f	6	152.157	0.237384	74	29	10	1	0	40	3	6	1	40	6
S005-S006	S006	control	3	f	6	175.435	0.235439	74	29	10	1	0	41	3	6	1	50	6
S005-S006	S006	control	3	f	6	81.1724	0.211277	74	29	10	1	0	42	3	6	1	50	6
S005-S006	S006	control	3	f	6	118.271	0.135427	74	29	10	1	0	43	3	6	1	50	6
S005-S006	S006	control	3	f	6	84.9659	0.104313	74	29	10	1	0	44	3	6	1	50	6
S005-S006	S006	control	3	f	6	108.203	0.0695597	74	29	10	1	0	45	3	6	1	50	6
S005-S006	S006	control	3	f	6	163.27	0.180104	74	29	10	1	0	46	3	6	1	50	6
S005-S006	S006	control	3	f	6	109.506	0.122429	74	29	10	1	0	47	3	6	1	50	6
S005-S006	S006	control	3	f	6	105.759	0.167917	74	29	10	1	0	48	3	6	1	50	6
S005-S006	S006	control	3	f	6	125.208	0.159538	74	29	10	1	0	49	3	6	1	50	6
S005-S006	S006	control	3	f	6	100.431	0.118502	74	29	10	1	0	50	3	6	1	50	6
S005-S006	S006	control	3	f	6	116.396	0.184787	74	29	10	1	0	51	3	6	1	60	6
S005-S006	S006	control	3	f	6	122.776	0.122047	74	29	10	1	0	52	3	6	1	60	6
S005-S006	S006	control	3	f	6	88.4685	0.148416	74	29	10	1	0	53	3	6	1	60	6
S005-S006	S006	control	3	f	6	107.982	0.126923	74	29	10	1	0	54	3	6	1	60	6
S005-S006	S006	control	3	f	6	104.601	0.0902017	74	29	10	1	0	55	3	6	1	60	6
S005-S006	S006	control	3	f	6	103.398	0.171245	74	29	10	1	0	56	3	6	1	60	6
S005-S006	S006	control	3	f	6	157.648	0.206681	74	29	10	1	0	57	3	6	1	60	6
S005-S006	S006	control	3	f	6	75.4698	0.0850331	74	29	10	1	0	58	3	6	1	60	6
S005-S006	S006	control	3	f	6	97.9708	0.104486	74	29	10	1	0	59	3	6	1	60	6
S007-S008	S007	control	4	m	1	290.975	0.537938	66	31	10	0	0	5	4	7	2	10	1
S007-S008	S007	control	4	m	1	35.8298	0.153038	66	31	10	0	0	6	4	7	2	10	1
S007-S008	S007	control	4	m	1	147.336	0.227877	66	31	10	0	0	7	4	7	2	10	1
S007-S008	S007	control	4	m	1	67.4258	0.0975576	66	31	10	0	0	8	4	7	2	10	1
S007-S008	S007	control	4	m	1	70.6674	0.0898136	66	31	10	0	0	9	4	7	2	10	1
S007-S008	S007	control	4	m	1	51.9644	0.153029	66	31	10	0	0	10	4	7	2	10	1
S007-S008	S007	control	4	m	1	136.006	0.173038	66	31	10	0	0	11	4	7	2	20	1
S007-S008	S007	control	4	m	1	49.0596	0.122236	66	31	10	0	0	12	4	7	2	20	1
S007-S008	S007	control	4	m	1	112.488	0.125064	66	31	10	0	0	13	4	7	2	20	1
S007-S008	S007	control	4	m	1	73.363	0.156997	66	31	10	0	0	14	4	7	2	20	1
S007-S008	S007	control	4	m	1	145.396	0.172115	66	31	10	0	0	15	4	7	2	20	1
S007-S008	S007	control	4	m	1	72.7533	0.15333	66	31	10	0	0	16	4	7	2	20	1
S007-S008	S007	control	4	m	1	91.5692	0.0902484	66	31	10	0	0	17	4	7	2	20	1
S007-S008	S007	control	4	m	1	77.5637	0.183347	66	31	10	0	0	18	4	7	2	20	1
S007-S008	S007	control	4	m	1	65.4155	0.0830899	66	31	10	0	0	19	4	7	2	20	1
S007-S008	S007	control	4	m	1	63.7744	0.167608	66	31	10	0	0	20	4	7	2	20	1
S007-S008	S007	control	4	m	1	122.84	0.133696	66	31	10	0	0	21	4	7	2	30	1
S007-S008	S007	control	4	m	1	63.8131	0.153632	66	31	10	0	0	22	4	7	2	30	1
S007-S008	S007	control	4	m	1	112.28	0.205171	66	31	10	0	0	23	4	7	2	30	1
[truncated: 4,601 more rows]

## Sheet: third_person
ID	Gender	Task	Q1	Trigger.F1	Trigger.F2	Trigger.C1	Trigger.C2	Q2	Q3	Sujet1	Sujet2	Absent	Present	Trigger	Empathy	R2
S001	Male	1	14	26	24	26	24	0	6	S001	S002	0	1	25	67	0
S001	Male	2	19	54	18	54	44	1	6	S001	S002	0	1	42.5	67	1
S001	Male	3	13	16	13	16	13	1	5	S001	S002	0	1	14.5	67	1
S001	Male	4	14	17	17	17	17	0	6	S001	S002	0	1	17	67	0
S001	Male	5	21	11	12	11	12	0	5	S001	S002	0	1	11.5	67	0
S001	Male	6	14	8	11	8	11	1	5	S001	S002	0	1	9.5	67	1
S001	Male	2	23	19	16	19	16	0	6	S003	S004	1	0	17.5	67	1
S001	Male	3	18	16	15	16	15	0	7	S003	S004	1	0	15.5	67	1
S001	Male	4	11	24	31	24	31	0	7	S003	S004	1	0	27.5	67	1
S001	Male	5	12	27	13	27	13	1	7	S003	S004	1	0	20	67	0
S001	Male	6	13	17	18	17	18	0	6	S003	S004	1	0	17.5	67	1
S001	Male	2	21	18	12	18	12	1	4	S005	S006	1	0	15	67	0
S001	Male	3	19	43	13	43	13	0	5	S005	S006	1	0	28	67	1
S001	Male	4	14	26	9	26	9	1	5	S005	S006	1	0	17.5	67	0
S001	Male	5	16	15	13	15	13	0	6	S005	S006	1	0	14	67	1
S001	Male	6	26	17	11	17	11	0	7	S005	S006	1	0	14	67	1
S001	Male	1	18	24	17	24	17	0	6	S007	S008	1	0	20.5	67	1
S001	Male	1	21	24	17	24	17	0	6	S007	S008	1	0	20.5	67	1
S001	Male	2	31	23	18	23	29	0	5	S007	S008	1	0	23.25	67	1
S001	Male	3	30	20	8	20	34	1	4	S007	S008	1	0	20.5	67	0
S001	Male	4	30	28	12	28	12	0	4	S007	S008	1	0	20	67	1
S001	Male	5	21	32	10	32	37	0	6	S007	S008	1	0	27.75	67	1
S001	Male	6	16	30	16	30	41	1	7	S007	S008	1	0	29.25	67	0
S001	Male	1	26	18	17	18	17	0	5	S009	S010	1	0	17.5	67	1
S001	Male	2	23	18	19	18	19	0	4	S009	S010	1	0	18.5	67	1
S001	Male	3	28	22	13	22	13	0	5	S009	S010	1	0	17.5	67	1
S001	Male	4	38	30	13	30	31	0	5	S009	S010	1	0	26	67	1
S001	Male	5	21	19	15	9	15	0	9	S009	S010	1	0	14.5	67	1
S001	Male	6	27	15	11	15	11	0	6	S009	S010	1	0	13	67	1
S001	Male	1	14	15	11	15	11	0	4	S011	S012	1	0	13	67	1
S001	Male	2	21	41	21	41	21	0	4	S011	S012	1	0	31	67	1
S001	Male	3	14	35	31	35	31	0	7	S011	S012	1	0	33	67	1
S001	Male	4	11	45	20	45	51	1	5	S011	S012	1	0	40.25	67	0
S001	Male	5	15	20	21	20	21	1	4	S011	S012	1	0	20.5	67	0
S001	Male	6	14	21	30	21	30	0	6	S011	S012	1	0	25.5	67	1
S001	Male	1	11	12	12	12	12	0	8	S013	S014	1	0	12	67	1
S001	Male	2	28	15	20	15	20	0	8	S013	S014	1	0	17.5	67	1
S001	Male	3	25	11	18	11	18	0	5	S013	S014	1	0	14.5	67	1
S001	Male	4	12	10	13	10	13	0	5	S013	S014	1	0	11.5	67	1
S001	Female	5	21	15	23	15	23	0	4	S013	S014	1	0	19	67	1
S001	Female	6	13	8	10	8	10	0	7	S013	S014	1	0	9	67	1
S002	Female	1	6	26	24	26	24	1	7	S001	S002	0	1	25	56	1
S002	Female	2	10	54	18	54	44	0	6	S001	S002	0	1	42.5	56	0
S002	Female	3	14	16	13	16	13	0	7	S001	S002	0	1	14.5	56	0
S002	Female	4	19	17	17	17	17	0	7	S001	S002	0	1	17	56	0
S002	Female	5	6	11	12	11	12	0	5	S001	S002	0	1	11.5	56	0
S002	Female	6	7	8	11	8	11	0	7	S001	S002	0	1	9.5	56	0
S002	Female	1	22	26	14	26	14	0	9	S003	S004	1	0	20	56	1
S002	Female	2	10	19	16	19	16	0	9	S003	S004	1	0	17.5	56	1
S002	Female	3	5	16	15	16	15	0	7	S003	S004	1	0	15.5	56	1
S002	Female	4	4	24	31	24	31	0	8	S003	S004	1	0	27.5	56	1
S002	Female	5	9	27	13	27	13	0	7	S003	S004	1	0	20	56	1
S002	Female	6	10	17	18	17	18	0	9	S003	S004	1	0	17.5	56	1
S002	Female	2	8	18	12	18	12			S005	S006	1	0	15	56
S002	Female	3	10	43	13	43	13	1	5	S005	S006	1	0	28	56	0
S002	Female	4	13	26	9	26	9	1	8	S005	S006	1	0	17.5	56	0
S002	Female	5	8	15	13	15	13	0	6	S005	S006	1	0	14	56	1
S002	Female	6	6	17	11	17	11	1	7	S005	S006	1	0	14	56	0
S002	Female	1	7	24	17	24	17	1	5	S007	S008	1	0	20.5	56	0
S002	Female	1	9	24	17	24	17	1	9	S007	S008	1	0	20.5	56	0
S002	Female	2	13	23	18	23	29	0	6	S007	S008	1	0	23.25	56	1
S002	Female	3	10	20	8	20	34	0	6	S007	S008	1	0	20.5	56	1
S002	Female	4	5	28	12	28	12	0	9	S007	S008	1	0	20	56	1
S002	Female	5	19	32	10	32	37	0	6	S007	S008	1	0	27.75	56	1
S002	Female	6	9	30	16	30	41	0	7	S007	S008	1	0	29.25	56	1
S002	Female	1	10	18	17	18	17	0	7	S009	S010	1	0	17.5	56	1
S002	Female	2	7	18	19	18	19	0	9	S009	S010	1	0	18.5	56	1
S002	Female	3	11	22	13	22	13	0	6	S009	S010	1	0	17.5	56	1
S002	Female	4	12	30	13	30	31	1	4	S009	S010	1	0	26	56	0
S002	Female	5	10	19	15	9	15	0	6	S009	S010	1	0	14.5	56	1
S002	Female	6	11	15	11	15	11	0	8	S009	S010	1	0	13	56	1
S002	Female	1	10	63	32	15	11	0	7	S011	S012	1	0	30.25	56	1
S002	Female	2	25	41	21	41	21	0	7	S011	S012	1	0	31	56	1
S002	Female	3	32	35	31	35	31	0	9	S011	S012	1	0	33	56	1
S002	Female	4	16	45	20	45	51	0	9	S011	S012	1	0	40.25	56	1
S002	Female	5	12	20	21	20	21	0	8	S011	S012	1	0	20.5	56	1
S002	Female	6	8	21	30	21	30	0	8	S011	S012	1	0	25.5	56	1
S002	Female	1	4	12	12	12	12	0	6	S013	S014	1	0	12	56	1
S002	Female	2	13	15	20	15	20	0	6	S013	S014	1	0	17.5	56	1
S002	Female	3	34	11	18	11	18	0	9	S013	S014	1	0	14.5	56	1
S002	Female	4	10	10	13	10	13	1	7	S013	S014	1	0	11.5	56	0
S002	Male	5	7	15	23	15	23	0	8	S013	S014	1	0	19	56	1
S002	Male	6	4	8	10	8	10	0	8	S013	S014	1	0	9	56	1
S003	Male	1	27	26	24	26	24	0	5	S001	S002	1	0	25	54	1
S003	Male	2	12	54	18	54	44	0	6	S001	S002	1	0	42.5	54	1
S003	Male	3	45	16	13	16	13	0	6	S001	S002	1	0	14.5	54	1
S003	Male	4	31	17	17	17	17	0	4	S001	S002	1	0	17	54	1
S003	Male	5	19	11	12	11	12	0	4	S001	S002	1	0	11.5	54	1
S003	Male	6	14	8	11	8	11	0	3	S001	S002	1	0	9.5	54	1
S003	Male	1	20	26	14	26	14	0	2	S003	S004	0	1	20	54	0
S003	Male	2	20	19	16	19	16	1	3	S003	S004	0	1	17.5	54	1
S003	Male	3	8	16	15	16	15	1	6	S003	S004	0	1	15.5	54	1
S003	Male	4	9	24	31	24	31	1	4	S003	S004	0	1	27.5	54	1
S003	Male	5		27	13	27	13	0	2	S003	S004	0	1	20	54	0
S003	Male	6	10	17	18	17	18	1	5	S003	S004	0	1	17.5	54	1
S003	Male	2	10	18	12	18	12	0	5	S005	S006	1	0	15	54	1
S003	Male	3	15	43	13	43	13	0	10	S005	S006	1	0	28	54	1
S003	Male	4	21	26	9	26	9	0	10	S005	S006	1	0	17.5	54	1
S003	Male	5	23	15	13	15	13	0	7	S005	S006	1	0	14	54	1
S003	Male	6	15	17	11	17	11	0	9	S005	S006	1	0	14	54	1
S003	Male	1	44	24	17	24	17	0	6	S007	S008	1	0	20.5	54	1
S003	Male	1	19	24	17	24	17	0	10	S007	S008	1	0	20.5	54	1
S003	Male	2		23	18	23	29	0	8	S007	S008	1	0	23.25	54	1
S003	Male	3	37	20	8	20	34	0	10	S007	S008	1	0	20.5	54	1
S003	Male	4	9	28	12	28	12	0	7	S007	S008	1	0	20	54	1
S003	Male	5		32	10	32	37	0	8	S007	S008	1	0	27.75	54	1
S003	Male	6	23	30	16	30	41	0	8	S007	S008	1	0	29.25	54	1
S003	Male	1	46	18	17	18	17	0	10	S009	S010	1	0	17.5	54	1
S003	Male	2		18	19	18	19	0	10	S009	S010	1	0	18.5	54	1
S003	Male	3		22	13	22	13	0	6	S009	S010	1	0	17.5	54	1
S003	Male	4	31	30	13	30	31	0	10	S009	S010	1	0	26	54	1
S003	Male	5	32	19	15	9	15	0	10	S009	S010	1	0	14.5	54	1
S003	Male	6	20	15	11	15	11	0	10	S009	S010	1	0	13	54	1
S003	Male	1		63	32	15	11	0	4	S011	S012	1	0	30.25	54	1
S003	Male	2	20	41	21	41	21	0	6	S011	S012	1	0	31	54	1
S003	Male	3		35	31	35	31	0	8	S011	S012	1	0	33	54	1
S003	Male	4	17	45	20	45	51	0	7	S011	S012	1	0	40.25	54	1
S003	Male	5	16	20	21	20	21	0	2	S011	S012	1	0	20.5	54	1
S003	Male	6	25	21	30	21	30	0	5	S011	S012	1	0	25.5	54	1
S003	Male	1	18	12	12	12	12	0	5	S013	S014	1	0	12	54	1
S003	Male	2	31	15	20	15	20	0	5	S013	S014	1	0	17.5	54	1
S003	Male	3	9	11	18	11	18	0	3	S013	S014	1	0	14.5	54	1
S003	Male	4		10	13	10	13	0	5	S013	S014	1	0	11.5	54	1
S003	Male	5	27	15	23	15	23	0	7	S013	S014	1	0	19	54	1
S003	Male	6	20	8	10	8	10	0	6	S013	S014	1	0	9	54	1
S004															67
S005	Male	1	12	26	24	26	24	0	0	S001	S002	1	0	25	59	1
S005	Male	2	8	54	18	54	44	0	0	S001	S002	1	0	42.5	59	1
S005	Male	3		16	13	16	13	0	0	S001	S002	1	0	14.5	59	1
S005	Male	4	20	17	17	17	17	0	0	S001	S002	1	0	17	59	1
S005	Male	6	10	8	11	8	11	0	0	S001	S002	1	0	9.5	59	1
S005	Male	1		26	14	26	14	0	0	S003	S004	1	0	20	59	1
S005	Male	2		19	16	19	16	0	0	S003	S004	1	0	17.5	59	1
S005	Male	3	19	16	15	16	15	0	0	S003	S004	1	0	15.5	59	1
S005	Male	4	10	24	31	24	31	0	0	S003	S004	1	0	27.5	59	1
S005	Male	5		27	13	27	13	0	0	S003	S004	1	0	20	59	1
S005	Male	6	10	17	18	17	18	0	0	S003	S004	1	0	17.5	59	1
S005	Male	2	8	18	12	18	12	0	0	S005	S006	0	1	15	59	0
S005	Male	3	10	43	13	43	13	0	0	S005	S006	0	1	28	59	0
S005	Male	4	20	26	9	26	9	0	0	S005	S006	0	1	17.5	59	0
S005	Male	5	20	15	13	15	13	0	0	S005	S006	0	1	14	59	0
S005	Male	6	12	17	11	17	11	0	0	S005	S006	0	1	14	59	0
S005	Male	1	11	24	17	24	17	0	0	S007	S008	1	0	20.5	59	1
S005	Male	1	15	24	17	24	17	0	0	S007	S008	1	0	20.5	59	1
S005	Male	2	37	23	18	23	29	0	0	S007	S008	1	0	23.25	59	1
S005	Male	3	7	20	8	20	34	0	0	S007	S008	1	0	20.5	59	1
S005	Male	4	30	28	12	28	12	0	0	S007	S008	1	0	20	59	1
S005	Male	5	20	32	10	32	37	0	0	S007	S008	1	0	27.75	59	1
S005	Male	6	24	30	16	30	41	0	0	S007	S008	1	0	29.25	59	1
S005	Male	1	58	18	17	18	17	0	0	S009	S010	1	0	17.5	59	1
S005	Male	2		18	19	18	19	0	5	S009	S010	1	0	18.5	59	1
S005	Male	3	28	22	13	22	13	0	0	S009	S010	1	0	17.5	59	1
S005	Male	4		30	13	30	31	0	0	S009	S010	1	0	26	59	1
S005	Male	5	15	19	15	9	15	0	0	S009	S010	1	0	14.5	59	1
S005	Male	6	40	15	11	15	11	0	0	S009	S010	1	0	13	59	1
S005	Male	1	24	63	32	15	11	0	0	S011	S012	1	0	30.25	59	1
S005	Male	2	54	41	21	41	21	0	0	S011	S012	1	0	31	59	1
S005	Female	2	34	41	21	15	23	0	0	S011	S012	1	0	25	59	1
S005	Male	3	54	35	31	35	31	0	0	S011	S012	1	0	33	59	1
S005	Male	4	46	45	20	45	51	0	0	S011	S012	1	0	40.25	59	1
S005	Male	5	12	20	21	20	21	0	0	S011	S012	1	0	20.5	59	1
S005	Male	6	43	21	30	21	30	0	0	S011	S012	1	0	25.5	59	1
S005	Male	1	5	12	12	12	12	0	0	S013	S014	1	0	12	59	1
S005	Male	2	28	15	20	15	20	0	0	S013	S014	1	0	17.5	59	1
S005	Male	3	17	11	18	11	18	0	0	S013	S014	1	0	14.5	59	1
S005	Male	4	20	10	13	10	13	0	0	S013	S014	1	0	11.5	59	1
S005	Female	5	16	15	23	15	23	0	0	S013	S014	1	0	19	59	1
S006															74
S007															66
S008															59
S009	Male	1	4	26	24	26	24	0	9	S001	S002	1	0	25	53	1
S009	Male	2	5	54	18	54	44	0	9	S001	S002	1	0	42.5	53	1
S009	Male	2	4	54	18	54	44	0	9	S001	S002	1	0	42.5	53	1
S009	Male	3	7	16	13	16	13	0	9	S001	S002	1	0	14.5	53	1
S009	Male	4	10	17	17	17	17	0	9	S001	S002	1	0	17	53	1
S009	Male	5	5	11	12	11	12	0	9	S001	S002	1	0	11.5	53	1
S009	Male	6	7	8	11	8	11	0	9	S001	S002	1	0	9.5	53	1
S009	Male	2	3	19	16	19	16	0	9	S003	S004	1	0	17.5	53	1
S009	Male	3	1	16	15	16	15	0	9	S003	S004	1	0	15.5	53	1
S009	Male	4	3	24	31	24	31	0	9	S003	S004	1	0	27.5	53	1
S009	Male	5	3	27	13	27	13	0	9	S003	S004	1	0	20	53	1
S009	Male	6	6	17	18	17	18	0	9	S003	S004	1	0	17.5	53	1
S009	Male	2	5	18	12	18	12	0	9	S005	S006	1	0	15	53	1
S009	Male	3	6	43	13	43	13	0	9	S005	S006	1	0	28	53	1
S009	Male	4	4	26	9	26	9	1	6	S005	S006	1	0	17.5	53	0
S009	Male	5	4	15	13	15	13	0	9	S005	S006	1	0	14	53	1
S009	Male	6	4	17	11	17	11	0	9	S005	S006	1	0	14	53	1
S009	Male	1	7	24	17	24	17	1	5	S007	S008	1	0	20.5	53	0
S009	Male	1	5	24	17	24	17	0	9	S007	S008	1	0	20.5	53	1
S009	Male	2	12	23	18	23	29	0	9	S007	S008	1	0	23.25	53	1
S009	Male	3	4	20	8	20	34	0	9	S007	S008	1	0	20.5	53	1
S009	Male	4	4	28	12	28	12	0	6	S007	S008	1	0	20	53	1
S009	Male	5	3	32	10	32	37	0	9	S007	S008	1	0	27.75	53	1
S009	Male	6	3	30	16	30	41	0	9	S007	S008	1	0	29.25	53	1
S009	Male	1	9	18	17	18	17	1	5	S009	S010	0	1	17.5	53	1
S009	Male	2	4	18	19	18	19	1	9	S009	S010	0	1	18.5	53	1
S009	Male	3	7	22	13	22	13	0	7	S009	S010	0	1	17.5	53	0
S009	Male	4	6	30	13	30	31	0	7	S009	S010	0	1	26	53	0
S009	Male	5	7	19	15	9	15	1	9	S009	S010	0	1	14.5	53	1
S009	Male	6	4	15	11	15	11	1	8	S009	S010	0	1	13	53	1
S009	Male	1	6	63	32	15	11	0	9	S011	S012	1	0	30.25	53	1
S009	Male	2	6	41	21	41	21	0	9	S011	S012	1	0	31	53	1
S009	Male	3	8	35	31	35	31	0	9	S011	S012	1	0	33	53	1
S009	Male	4	8	45	20	45	51	0	9	S011	S012	1	0	40.25	53	1
S009	Male	5	6	20	21	20	21	0	9	S011	S012	1	0	20.5	53	1
S009	Male	6	5	21	30	21	30	0	9	S011	S012	1	0	25.5	53	1
S009	Male	1	4	12	12	12	12	0	9	S013	S014	1	0	12	53	1
S009	Male	2	4	15	20	15	20	0	9	S013	S014	1	0	17.5	53	1
S009	Male	3	3	11	18	11	18	0	9	S013	S014	1	0	14.5	53	1
S009	Male	4	2	10	13	10	13	1	7	S013	S014	1	0	11.5	53	0
S009	Male	5	5	15	23	15	23	1	6	S013	S014	1	0	19	53	0
S009	Female	6	4	8	10	8	10	0	9	S013	S014	1	0	9	53	1
S010	Female	1	12	26	24	26	24	1	3	S001	S002	1	0	25	58	0
S010	Female	2	20	54	18	54	44	1	3	S001	S002	1	0	42.5	58	0
S010	Female	3	48	16	13	16	13	1	3	S001	S002	1	0	14.5	58	0
S010	Female	4	37	17	17	17	17	1	3	S001	S002	1	0	17	58	0
S010	Female	5	18	11	12	11	12	1	2	S001	S002	1	0	11.5	58	0
S010	Female	6	15	8	11	8	11	0	7	S001	S002	1	0	9.5	58	1
S010	Female	1		26	14	26	14	0	6	S003	S004	1	0	20	58	1
S010	Female	2	18	19	16	19	16	0	7	S003	S004	1	0	17.5	58	1
S010	Female	3	18	16	15	16	15	0	8	S003	S004	1	0	15.5	58	1
S010	Female	4	6	24	31	24	31	0	5	S003	S004	1	0	27.5	58	1
S010	Female	5	34	27	13	27	13	0	2	S003	S004	1	0	20	58	1
S010	Female	6	5	17	18	17	18	0	6	S003	S004	1	0	17.5	58	1
S010	Female	2	11	18	12	18	12	0	7	S005	S006	1	0	15	58	1
S010	Female	3	7	43	13	43	13	0	6	S005	S006	1	0	28	58	1
S010	Female	4	23	26	9	26	9	0	7	S005	S006	1	0	17.5	58	1
S010	Female	5	19	15	13	15	13	0	7	S005	S006	1	0	14	58	1
S010	Female	6	24	17	11	17	11	0	6	S005	S006	1	0	14	58	1
S010	Female	1	45	24	17	24	17	1	10	S007	S008	1	0	20.5	58	0
S010	Female	1	19	24	17	24	17	0	8	S007	S008	1	0	20.5	58	1
S010	Female	2	16	23	18	23	29	0	8	S007	S008	1	0	23.25	58	1
S010	Female	3	40	20	8	20	34	0	5	S007	S008	1	0	20.5	58	1
S010	Female	4	55	28	12	28	12	0	6	S007	S008	1	0	20	58	1
S010	Female	5	35	32	10	32	37	0	6	S007	S008	1	0	27.75	58	1
S010	Female	6	10	30	16	30	41	0	5	S007	S008	1	0	29.25	58	1
S010	Female	1	30	18	17	18	17	1	2	S009	S010	0	1	17.5	58	1
S010	Female	2	55	18	19	18	19	1	7	S009	S010	0	1	18.5	58	1
S010	Female	3	12	22	13	22	13	1	5	S009	S010	0	1	17.5	58	1
S010	Female	4	8	30	13	30	31	1	7	S009	S010	0	1	26	58	1
S010	Female	5	28	19	15	9	15	1	7	S009	S010	0	1	14.5	58	1
S010	Female	6		15	11	15	11	1	9	S009	S010	0	1	13	58	1
S010	Female	1	56	63	32	15	11	0	6	S011	S012	1	0	30.25	58	1
S010	Female	2	16	41	21	41	21	0	8	S011	S012	1	0	31	58	1
S010	Female	3		35	31	35	31	0	9	S011	S012	1	0	33	58	1
S010	Female	4		45	20	45	51	0	8	S011	S012	1	0	40.25	58	1
S010	Female	5	5	20	21	20	21	0	10	S011	S012	1	0	20.5	58	1
S010	Female	6	18	21	30	21	30	0	6	S011	S012	1	0	25.5	58	1
S010	Female	1	18	12	12	12	12	0	3	S013	S014	1	0	12	58	1
S010	Female	2	37	15	20	15	20	0	10	S013	S014	1	0	17.5	58	1
S010	Female	3	5	11	18	11	18	1	4	S013	S014	1	0	14.5	58	0
S010	Female	4	20	10	13	10	13	1	6	S013	S014	1	0	11.5	58	0
S010	Female	5	10	15	23	15	23	1	3	S013	S014	1	0	19	58	0
S010	Male	6	30	8	10	8	10	0	4	S013	S014	1	0	9	58	1
S011	Male	1	34	26	24	26	24	1	3	S001	S002	1	0	25	59	0
S011	Male	2	46	54	18	54	44	0	7	S001	S002	1	0	42.5	59	1
S011	Male	3	19	16	13	16	13	0	6	S001	S002	1	0	14.5	59	1
S011	Male	4	47	17	17	17	17	0	6	S001	S002	1	0	17	59	1
S011	Male	5	37	11	12	11	12	0	9	S001	S002	1	0	11.5	59	1
S011	Male	6	47	8	11	8	11	0	7	S001	S002	1	0	9.5	59	1
S011	Male	1	30	26	14	26	14	0	5	S003	S004	1	0	20	59	1
S011	Male	2		19	16	19	16	0	8	S003	S004	1	0	17.5	59	1
S011	Male	3	24	16	15	16	15	0	7	S003	S004	1	0	15.5	59	1
S011	Male	4	16	24	31	24	31	0	8	S003	S004	1	0	27.5	59	1
S011	Male	5	17	27	13	27	13	0	9	S003	S004	1	0	20	59	1
S011	Male	6	48	17	18	17	18	0	3	S003	S004	1	0	17.5	59	1
S011	Male	2	41	18	12	18	12	0	7	S005	S006	1	0	15	59	1
S011	Male	3	20	43	13	43	13	0	5	S005	S006	1	0	28	59	1
S011	Male	4	30	26	9	26	9	0	9	S005	S006	1	0	17.5	59	1
S011	Male	5	29	15	13	15	13	0	8	S005	S006	1	0	14	59	1
S011	Male	6	25	17	11	17	11	0	8	S005	S006	1	0	14	59	1
S011	Male	1	24	24	17	24	17	1	5	S007	S008	1	0	20.5	59	0
S011	Male	1	18	24	17	24	17	0	7	S007	S008	1	0	20.5	59	1
S011	Male	2	44	23	18	23	29	0	8	S007	S008	1	0	23.25	59	1
S011	Male	3	38	20	8	20	34	0	10	S007	S008	1	0	20.5	59	1
S011	Male	4	38	28	12	28	12	0	7	S007	S008	1	0	20	59	1
S011	Male	5	47	32	10	32	37	0	9	S007	S008	1	0	27.75	59	1
S011	Male	6	25	30	16	30	41	0	4	S007	S008	1	0	29.25	59	1
S011	Male	1	30	18	17	18	17	1	4	S009	S010	1	0	17.5	59	0
S011	Male	2	13	18	19	18	19	0	7	S009	S010	1	0	18.5	59	1
S011	Male	3	20	22	13	22	13	0	9	S009	S010	1	0	17.5	59	1
S011	Male	4	40	30	13	30	31	0	5	S009	S010	1	0	26	59	1
S011	Male	5	46	19	15	9	15	0	6	S009	S010	1	0	14.5	59	1
S011	Male	6	22	15	11	15	11	0	8	S009	S010	1	0	13	59	1
S011	Male	1	31	63	32	15	11	0	9	S011	S012	0	1	30.25	59	0
S011	Male	2	42	41	21	41	21	0	6	S011	S012	0	1	31	59	0
S011	Male	3		35	31	35	31	0	8	S011	S012	0	1	33	59	0
S011	Male	4		45	20	45	51	0	5	S011	S012	0	1	40.25	59	0
S011	Male	5	15	20	21	20	21	0	4	S011	S012	0	1	20.5	59	0
S011	Male	6	29	21	30	21	30	0	5	S011	S012	0	1	25.5	59	0
S011	Male	1	25	12	12	12	12	1	6	S013	S014	1	0	12	59	0
S011	Male	2	31	15	20	15	20	1	5	S013	S014	1	0	17.5	59	0
S011	Male	3	49	11	18	11	18	1	8	S013	S014	1	0	14.5	59	0
S011	Male	4	35	10	13	10	13	0	8	S013	S014	1	0	11.5	59	1
S011	Male	5	45	15	23	15	23	0	7	S013	S014	1	0	19	59	1
S011	Female	6	33	8	10	8	10	1	7	S013	S014	1	0	9	59	0
S012	Female	1	39	26	24	26	24	0	4	S001	S002	1	0	25	71	1
S012	Female	2	37	54	18	54	44	0	8	S001	S002	1	0	42.5	71	1
S012	Female	3	54	16	13	16	13	0	3	S001	S002	1	0	14.5	71	1
S012	Female	4	41	17	17	17	17	0	2	S001	S002	1	0	17	71	1
S012	Female	5	54	11	12	11	12	0	8	S001	S002	1	0	11.5	71	1
S012	Female	6	40	8	11	8	11	0		S001	S002	1	0	9.5	71	1
S012	Female	1		26	14	26	14	0	8	S003	S004	1	0	20	71	1
S012	Female	2		19	16	19	16	0	3	S003	S004	1	0	17.5	71	1
S012	Female	3	44	16	15	16	15	0	6	S003	S004	1	0	15.5	71	1
S012	Female	4	23	24	31	24	31	0	2	S003	S004	1	0	27.5	71	1
S012	Female	5	26	27	13	27	13	0	8	S003	S004	1	0	20	71	1
S012	Female	6	9	17	18	17	18	0	2	S003	S004	1	0	17.5	71	1
S012	Female	2	40	18	12	18	12	0	6	S005	S006	1	0	15	71	1
S012	Female	3	12	43	13	43	13	0	7	S005	S006	1	0	28	71	1
S012	Female	4		26	9	26	9	0	3	S005	S006	1	0	17.5	71	1
S012	Female	5		15	13	15	13	0	3	S005	S006	1	0	14	71	1
S012	Female	6	28	17	11	17	11	0	7	S005	S006	1	0	14	71	1
S012	Female	1		24	17	24	17	1	7	S007	S008	1	0	20.5	71	0
S012	Female	1	36	24	17	24	17	0	5	S007	S008	1	0	20.5	71	1
S012	Female	2	48	23	18	23	29	0	4	S007	S008	1	0	23.25	71	1
S012	Female	3	42	20	8	20	34	0	3	S007	S008	1	0	20.5	71	1
S012	Female	4		28	12	28	12	0	3	S007	S008	1	0	20	71	1
S012	Female	5	48	32	10	32	37	0	4	S007	S008	1	0	27.75	71	1
S012	Female	6		30	16	30	41	1	4	S007	S008	1	0	29.25	71	0
S012	Female	1	45	18	17	18	17	0	2	S009	S010	1	0	17.5	71	1
S012	Female	2		18	19	18	19	0	7	S009	S010	1	0	18.5	71	1
S012	Female	3	48	22	13	22	13	0	7	S009	S010	1	0	17.5	71	1
S012	Female	4	30	30	13	30	31	0	9	S009	S010	1	0	26	71	1
S012	Female	5	31	19	15	9	15	0	6	S009	S010	1	0	14.5	71	1
S012	Female	6	57	15	11	15	11	0	3	S009	S010	1	0	13	71	1
S012	Female	1		63	32	15	11	0	6	S011	S012	0	1	30.25	71	0
S012	Female	2		41	21	41	21	1	5	S011	S012	0	1	31	71	1
S012	Female	3	45	35	31	35	31	1	6	S011	S012	0	1	33	71	1
S012	Female	4	45	45	20	45	51	1	7	S011	S012	0	1	40.25	71	1
S012	Female	5	15	20	21	20	21	0	9	S011	S012	0	1	20.5	71	0
S012	Female	6	36	21	30	21	30	0	6	S011	S012	0	1	25.5	71	0
S012	Female	1		12	12	12	12	1	3	S013	S014	1	0	12	71	0
S012	Female	2	30	15	20	15	20	0	7	S013	S014	1	0	17.5	71	1
S012	Female	3		11	18	11	18	0	6	S013	S014	1	0	14.5	71	1
S012	Female	4		10	13	10	13	0	4	S013	S014	1	0	11.5	71	1
S012	Female	5	21	15	23	15	23	0	3	S013	S014	1	0	19	71	1
S012	Male	6	59	8	10	8	10	1	4	S013	S014	1	0	9	71	0
S013	Male	1	17	26	24	26	24	0	6	S001	S002	1	0	25	70	1
S013	Male	2	12	54	18	54	44	0	7	S001	S002	1	0	42.5	70	1
S013	Male	3	7	16	13	16	13	1	7	S001	S002	1	0	14.5	70	0
S013	Male	4	17	17	17	17	17	1	8	S001	S002	1	0	17	70	0
S013	Male	5	8	11	12	11	12	0	8	S001	S002	1	0	11.5	70	1
S013	Male	6	5	8	11	8	11	0	9	S001	S002	1	0	9.5	70	1
S013	Male	1	11	26	14	26	14	0	8	S003	S004	1	0	20	70	1
S013	Male	2	17	19	16	19	16	0	10	S003	S004	1	0	17.5	70	1
S013	Male	3	5	16	15	16	15	0	10	S003	S004	1	0	15.5	70	1
S013	Male	4	3	24	31	24	31	0	10	S003	S004	1	0	27.5	70	1
S013	Male	5	5	27	13	27	13	0	10	S003	S004	1	0	20	70	1
S013	Male	6	4	17	18	17	18	0	10	S003	S004	1	0	17.5	70	1
S013	Male	2	6	18	12	18	12	0	8	S005	S006	1	0	15	70	1
S013	Male	3	6	43	13	43	13	0	7	S005	S006	1	0	28	70	1
S013	Male	4	6	26	9	26	9	0	7	S005	S006	1	0	17.5	70	1
S013	Male	5	7	15	13	15	13	1	9	S005	S006	1	0	14	70	0
S013	Male	6	6	17	11	17	11	0	10	S005	S006	1	0	14	70	1
S013	Male	1	8	24	17	24	17	1	8	S007	S008	1	0	20.5	70	0
S013	Male	1	6	24	17	24	17	0	6	S007	S008	1	0	20.5	70	1
S013	Male	2	29	23	18	23	29	1	7	S007	S008	1	0	23.25	70	0
S013	Male	3	5	20	8	20	34	1	8	S007	S008	1	0	20.5	70	0
S013	Male	4	6	28	12	28	12	1	8	S007	S008	1	0	20	70	0
S013	Male	5	37	32	10	32	37	1	6	S007	S008	1	0	27.75	70	0
S013	Male	6	5	30	16	30	41	1	7	S007	S008	1	0	29.25	70	0
S013	Male	1	11	18	17	18	17	1	7	S009	S010	1	0	17.5	70	0
S013	Male	2	16	18	19	18	19	0	7	S009	S010	1	0	18.5	70	1
S013	Male	3	7	22	13	22	13	1	7	S009	S010	1	0	17.5	70	0
S013	Male	4	8	30	13	30	31	1	6	S009	S010	1	0	26	70	0
S013	Male	5	14	19	15	9	15	0	7	S009	S010	1	0	14.5	70	1
S013	Male	6	7	15	11	15	11	1	7	S009	S010	1	0	13	70	0
S013	Male	1	6	63	32	15	11	0	9	S011	S012	1	0	30.25	70	1
S013	Male	2	17	41	21	41	21	0	7	S011	S012	1	0	31	70	1
S013	Male	3	22	35	31	35	31	0	7	S011	S012	1	0	33	70	1
S013	Male	4		45	20	45	51	1	8	S011	S012	1	0	40.25	70	0
S013	Male	5	7	20	21	20	21	0	8	S011	S012	1	0	20.5	70	1
S013	Male	6	5	21	30	21	30	0	9	S011	S012	1	0	25.5	70	1
S013	Male	1	8	12	12	12	12	0	9	S013	S014	0	1	12	70	0
S013	Male	2	22	15	20	15	20	0	10	S013	S014	0	1	17.5	70	0
S013	Male	3	6	11	18	11	18	0	10	S013	S014	0	1	14.5	70	0
S013	Male	4	3	10	13	10	13	0	10	S013	S014	0	1	11.5	70	0
S013	Male	5	6	15	23	15	23	0	9	S013	S014	0	1	19	70	0
S013	Female	6	5	8	10	8	10	0	10	S013	S014	0	1	9	70	0
S014	Female	1	5	26	24	26	24	1	2	S001	S002	1	0	25	66	0
S014	Female	2	6	54	18	54	44	0	1	S001	S002	1	0	42.5	66	1
S014	Female	3	8	16	13	16	13	0	1	S001	S002	1	0	14.5	66	1
S014	Female	4	18	17	17	17	17	0	1	S001	S002	1	0	17	66	1
S014	Female	5	9	11	12	11	12	0	1	S001	S002	1	0	11.5	66	1
S014	Female	6	6	8	11	8	11	0		S001	S002	1	0	9.5	66	1
S014	Female	1	12	26	14	26	14	0	6	S003	S004	1	0	20	66	1
S014	Female	2	6	19	16	19	16	0	5	S003	S004	1	0	17.5	66	1
S014	Female	3	6	16	15	16	15	0	7	S003	S004	1	0	15.5	66	1
S014	Female	4	4	24	31	24	31		2	S003	S004	1	0	27.5	66
S014	Female	5	7	27	13	27	13	0	6	S003	S004	1	0	20	66	1
S014	Female	6	8	17	18	17	18	0	3	S003	S004	1	0	17.5	66	1
S014	Female	2	70	18	12	18	12	0	2	S005	S006	1	0	15	66	1
S014	Female	4	6	26	9	26	9	1	2	S005	S006	1	0	17.5	66	0
S014	Female	5	4	15	13	15	13	0	1	S005	S006	1	0	14	66	1
S014	Female	6	6	17	11	17	11	1	4	S005	S006	1	0	14	66	0
S014	Female	1	8	24	17	24	17	0	4	S007	S008	1	0	20.5	66	1
S014	Female	1	8	24	17	24	17	0	4	S007	S008	1	0	20.5	66	1
S014	Female	1	10	24	17	24	17	0	2	S007	S008	1	0	20.5	66	1
S014	Female	2	20	23	18	23	29	0	0	S007	S008	1	0	23.25	66	1
S014	Female	3	6	20	8	20	34	1	2	S007	S008	1	0	20.5	66	0
S014	Female	4	5	28	12	28	12	0	1	S007	S008	1	0	20	66	1
S014	Female	5	18	32	10	32	37	0	0	S007	S008	1	0	27.75	66	1
S014	Female	6	4	30	16	30	41	0	2	S007	S008	1	0	29.25	66	1
S014	Female	1	9	18	17	18	17	0	3	S009	S010	1	0	17.5	66	1
S014	Female	2	8	18	19	18	19	1	5	S009	S010	1	0	18.5	66	0
S014	Female	3	10	22	13	22	13	1	2	S009	S010	1	0	17.5	66	0
S014	Female	4	6	30	13	30	31	0	1	S009	S010	1	0	26	66	1
S014	Female	5	10	19	15	9	15	0	2	S009	S010	1	0	14.5	66	1
S014	Female	6	8	15	11	15	11	1	3	S009	S010	1	0	13	66	0
S014	Female	1	6	63	32	15	11	0	4	S011	S012	1	0	30.25	66	1
S014	Female	2	9	41	21	41	21	0	1	S011	S012	1	0	31	66	1
S014	Female	3	16	35	31	35	31	1	2	S011	S012	1	0	33	66	0
S014	Female	4	9	45	20	45	51	0	8	S011	S012	1	0	40.25	66	1
S014	Female	5	12	20	21	20	21	0	2	S011	S012	1	0	20.5	66	1
S014	Female	6	6	21	30	21	30	1	4	S011	S012	1	0	25.5	66	0
S014	Female	1	12	12	12	12	12	0	1	S013	S014	0	1	12	66	0
S014	Female	2	11	15	20	15	20	1	1	S013	S014	0	1	17.5	66	1
S014	Female	3	8	11	18	11	18	0	4	S013	S014	0	1	14.5	66	0
S014	Female	4	4	10	13	10	13	1	6	S013	S014	0	1	11.5	66	1
S014	Female	5	4	15	23	15	23	0	2	S013	S014	0	1	19	66	0
S014	Male	5	12	15	23	15	23	0	6	S013	S014	0	1	19	66	0
S015	Male	1	6	26	24	26	24	0	10	S001	S002	1	0	25	54	1
S015	Male	2	26	54	18	54	44	1	9	S001	S002	1	0	42.5	54	0
S015	Male	3	19	16	13	16	13	1	9	S001	S002	1	0	14.5	54	0
S015	Male	6	26	8	11	8	11	1	10	S001	S002	1	0	9.5	54	0
S015	Male	1	37	26	14	26	14	0	10	S003	S004	1	0	20	54	1
S015	Male	3	36	16	15	16	15	0	10	S003	S004	1	0	15.5	54	1
S015	Male	4	34	24	31	24	31	0	10	S003	S004	1	0	27.5	54	1
S015	Male	1	24	9	10	9	10	1	10	S005	S006	1	0	9.5	54	0
S015	Male	4	19	26	9	26	9	1	10	S005	S006	1	0	17.5	54	0
S015	Male	5	11	15	13	15	13	1	10	S005	S006	1	0	14	54	0
S015	Male	1	47	24	17	24	17	0	10	S007	S008	1	0	20.5	54	1
S015	Male	2	18	23	18	23	29	1	10	S007	S008	1	0	23.25	54	0
S015	Male	3	12	20	8	20	34	1	10	S007	S008	1	0	20.5	54	0
S015	Male	6	50	30	16	30	41	1	10	S007	S008	1	0	29.25	54	0
S015	Male	1	26	18	17	18	17	0	10	S009	S010	1	0	17.5	54	1
S015	Male	3	10	22	13	22	13	0	10	S009	S010	1	0	17.5	54	1
S015	Male	5	4	19	15	9	15	0	10	S009	S010	1	0	14.5	54	1
S015	Male	1	22	63	32	15	11	1	10	S011	S012	1	0	30.25	54	0
S015	Male	2	38	41	21	41	21	1	10	S011	S012	1	0	31	54	0
S015	Male	3	10	35	31	35	31	1	10	S011	S012	1	0	33	54	0
S015	Male	4	26	45	20	45	51	1	10	S011	S012	1	0	40.25	54	0
S015	Male	6	15	21	30	21	30	0	10	S011	S012	1	0	25.5	54	1
S015	Male	5	6	15	23	15	23	0	10	S013	S014	1	0	19	54	1
S015	Male	6	31	8	10	8	10	1	10	S013	S014	1	0	9	54	0
S015	Male	1	28	25	22	25	22	0	10	S015	S016	0	1	23.5	54	0
S015	Male	2	22	33	30	33	30	0	10	S015	S016	0	1	31.5	54	0
S015	Male	3	25	34	33	34	33	0	10	S015	S016	0	1	33.5	54	0
S015	Male	4	54	33	48	33	48	0	10	S015	S016	0	1	40.5	54	0
S015	Male	5	31	30	31	30	31	0	10	S015	S016	0	1	30.5	54	0
S015	Male	6	32	56	62	56	62	0	10	S015	S016	0	1	59	54	0
S015	Male	1	39	17	37	17	37	0	10	S057	S058	1	0	27	54	1
S015	Male	2	35	16	16	16	16	0	10	S057	S058	1	0	16	54	1
S015	Male	3	6	7	16	7	28	0	10	S057	S058	1	0	14.5	54	1
S015	Male	4	23	8	11	8	11	0	5	S057	S058	1	0	9.5	54	1
S015	Male	5	9	14	11	14	11	0	10	S057	S058	1	0	12.5	54	1
S015	Male	6	18	9	17	9	17	0	10	S057	S058	1	0	13	54	1
S015	Male	1	25	14	15	14	15	0	10	S059	S060	1	0	14.5	54	1
S015	Male	2	11	21	17	21	17	0	10	S059	S060	1	0	19	54	1
S015	Male	3	7	25	20	25	20	0	10	S059	S060	1	0	22.5	54	1
S015	Male	4	12	21	27	21	27	0	10	S059	S060	1	0	24	54	1
S015	Male	5	11	32	34	32	34	0	10	S059	S060	1	0	33	54	1
S015	Female	6	43	18	17	18	17	0	10	S059	S060	1	0	17.5	54	1
S016	Female	1	28	26	24	26	24	0	5	S001	S002	1	0	25	52	1
S016	Female	3	39	16	13	16	13	0	6	S001	S002	1	0	14.5	52	1
S016	Female	5	2	11	12	11	12	0	5	S001	S002	1	0	11.5	52	1
S016	Female	3	20	16	15	16	15	0	6	S003	S004	1	0	15.5	52	1
S016	Female	4	8	24	31	24	31	0	7	S003	S004	1	0	27.5	52	1
S016	Female	1	16	9	10	9	10	0	6	S005	S006	1	0	9.5	52	1
S016	Female	4	33	26	9	26	9	0	5	S005	S006	1	0	17.5	52	1
S016	Female	6	18	17	11	17	11	0	6	S005	S006	1	0	14	52	1
S016	Female	1	41	24	17	24	17	0	6	S007	S008	1	0	20.5	52	1
S016	Female	4	16	28	12	28	12	0	3	S007	S008	1	0	20	52	1
S016	Female	6	21	30	16	30	41	0	8	S007	S008	1	0	29.25	52	1
S016	Female	1	18	18	17	18	17	0	6	S009	S010	1	0	17.5	52	1
S016	Female	2	48	18	19	18	19	0	6	S009	S010	1	0	18.5	52	1
S016	Female	4	54	30	13	30	31	0	6	S009	S010	1	0	26	52	1
S016	Female	5	46	19	15	9	15	0	6	S009	S010	1	0	14.5	52	1
S016	Female	6	28	15	11	15	11	0	6	S009	S010	1	0	13	52	1
S016	Female	1	58	63	32	15	11	0	6	S011	S012	1	0	30.25	52	1
S016	Female	2	56	41	21	41	21	1	4	S011	S012	1	0	31	52	0
S016	Female	4	34	45	20	45	51	1	4	S011	S012	1	0	40.25	52	0
S016	Female	6	30	21	30	21	30	1	2	S011	S012	1	0	25.5	52	0
S016	Female	1	24	12	12	12	12	0	5	S013	S014	1	0	12	52	1
S016	Female	2	27	15	20	15	20	0	5	S013	S014	1	0	17.5	52	1
S016	Female	3	19	11	18	11	18	1	2	S013	S014	1	0	14.5	52	0
S016	Female	5	14	15	23	15	23	0	3	S013	S014	1	0	19	52	1
S016	Female	1	36	25	22	25	22	0	4	S015	S016	0	1	23.5	52	0
S016	Female	2		33	30	33	30	0	5	S015	S016	0	1	31.5	52	0
S016	Female	3	28	34	33	34	33	0	4	S015	S016	0	1	33.5	52	0
S016	Female	4	55	33	48	33	48	0	5	S015	S016	0	1	40.5	52	0
S016	Female	5	28	30	31	30	31	0	5	S015	S016	0	1	30.5	52	0
S016	Female	6	38	56	62	56	62	0	4	S015	S016	0	1	59	52	0
S016	Female	1	48	17	37	17	37	1	3	S057	S058	1	0	27	52	0
S016	Female	2	24	16	16	16	16	1	1	S057	S058	1	0	16	52	0
S016	Female	3	28	7	16	7	28	1	3	S057	S058	1	0	14.5	52	0
S016	Female	4	17	8	11	8	11	0	8	S057	S058	1	0	9.5	52	1
S016	Female	5	18	14	11	14	11	1	1	S057	S058	1	0	12.5	52	0
S016	Female	6	44	9	17	9	17	1	4	S057	S058	1	0	13	52	0
S016	Female	1	55	14	15	14	15	1	2	S059	S060	1	0	14.5	52	0
S016	Female	2	46	21	17	21	17	1	1	S059	S060	1	0	19	52	0
S016	Female	3	51	25	20	25	20	0	6	S059	S060	1	0	22.5	52	1
S016	Female	4	46	21	27	21	27	0	6	S059	S060	1	0	24	52	1
S016	Female	5	28	32	34	32	34	0	5	S059	S060	1	0	33	52	1
S016	Male	6	13	18	17	18	17	1	3	S059	S060	1	0	17.5	52	0
S017															51
S018															73
S019															74
S020															68
S021															82
S022															65
S023															68
S024															63
S025															68
S026															70
S027															58
S028															63
S029															66
S030															68
S031															44
S032															58
S033															69
S034															62
S035															58
S036															53
S037															54
S038															81
S039															60
S040															55
S041															54
S042															62
S043															62
S044															53
S045															56
S046															62
S047															64
S048															69
S057	Male	3	8	16	13	16	13	1	8	S001	S002	1	0	14.5	64	0
S057	Male	4	14	17	17	17	17	1	7	S001	S002	1	0	17	64	0
S057	Male	5	13	11	12	11	12	1	6	S001	S002	1	0	11.5	64	0
S057	Male	1		26	14	26	14	0	9	S003	S004	1	0	20	64	1
S057	Male	2		19	16	19	16	0	10	S003	S004	1	0	17.5	64	1
S057	Male	3	14	16	15	16	15	0	10	S003	S004	1	0	15.5	64	1
S057	Male	4	5	24	31	24	31	0	10	S003	S004	1	0	27.5	64	1
S057	Male	5	5	27	13	27	13	0	10	S003	S004	1	0	20	64	1
S057	Male	2	6	18	12	18	12	1	7	S005	S006	1	0	15	64	0
S057	Male	4	21	26	9	26	9	0	8	S005	S006	1	0	17.5	64	1
S057	Male	5	6	15	13	15	13	0	10	S005	S006	1	0	14	64	1
S057	Male	1	10	24	17	24	17	0	7	S007	S008	1	0	20.5	64	1
S057	Male	2	17	23	18	23	29	1	8	S007	S008	1	0	23.25	64	0
S057	Male	3	8	20	8	20	34	1	8	S007	S008	1	0	20.5	64	0
S057	Male	6	8	30	16	30	41	1	10	S007	S008	1	0	29.25	64	0
S057	Male	1	8	18	17	18	17	0	10	S009	S010	1	0	17.5	64	1
S057	Male	2	10	18	19	18	19	0	5	S009	S010	1	0	18.5	64	1
S057	Male	4	21	30	13	30	31	0	10	S009	S010	1	0	26	64	1
S057	Male	5	30	19	15	9	15	0	10	S009	S010	1	0	14.5	64	1
S057	Male	1	8	63	32	15	11	1	9	S011	S012	1	0	30.25	64	0
S057	Male	4	10	45	20	45	51	1	8	S011	S012	1	0	40.25	64	0
S057	Male	2	30	15	20	15	20	0	10	S013	S014	1	0	17.5	64	1
S057	Male	3	6	11	18	11	18	0	10	S013	S014	1	0	14.5	64	1
S057	Male	4	14	10	13	10	13	0	10	S013	S014	1	0	11.5	64	1
S057	Male	6	6	8	10	8	10	0	10	S013	S014	1	0	9	64	1
S057	Male	1	5	25	22	25	22	0	10	S015	S016	1	0	23.5	64	1
S057	Male	2		33	30	33	30	0	10	S015	S016	1	0	31.5	64	1
S057	Male	3	43	34	33	34	33	0	10	S015	S016	1	0	33.5	64	1
S057	Male	4	28	33	48	33	48	0	10	S015	S016	1	0	40.5	64	1
S057	Male	5	30	30	31	30	31	0	9	S015	S016	1	0	30.5	64	1
S057	Male	6	6	56	62	56	62	0	10	S015	S016	1	0	59	64	1
S057	Male	1	6	17	37	17	37	0	10	S057	S058	0	1	27	64	0
S057	Male	2		16	16	16	16	0	10	S057	S058	0	1	16	64	0
S057	Male	3	15	7	16	7	28	0	10	S057	S058	0	1	14.5	64	0
S057	Male	4	5	8	11	8	11	0	10	S057	S058	0	1	9.5	64	0
S057	Male	5		14	11	14	11	0	9	S057	S058	0	1	12.5	64	0
S057	Male	6	17	9	17	9	17	0	10	S057	S058	0	1	13	64	0
S057	Male	2	15	21	17	21	17	0	10	S059	S060	1	0	19	64	1
S057	Male	3	16	25	20	25	20	0	10	S059	S060	1	0	22.5	64	1
S057	Male	4	6	21	27	21	27	0	10	S059	S060	1	0	24	64	1
S057	Male	5	33	32	34	32	34	0	10	S059	S060	1	0	33	64	1
S057	Female	6	6	18	17	18	17	0	10	S059	S060	1	0	17.5	64	1
S058	Female	1	18	26	24	26	24	0	8	S001	S002	1	0	25	64	1
S058	Female	2	12	54	18	54	44	0	10	S001	S002	1	0	42.5	64	1
S058	Female	1	19	26	14	26	14	0	10	S003	S004	1	0	20	64	1
S058	Female	2	11	19	16	19	16	0	10	S003	S004	1	0	17.5	64	1
S058	Female	4	7	24	31	24	31	0	9	S003	S004	1	0	27.5	64	1
S058	Female	6	9	17	18	17	18	0	10	S003	S004	1	0	17.5	64	1
S058	Female	4	24	26	9	26	9	0	7	S005	S006	1	0	17.5	64	1
S058	Female	5	12	15	13	15	13	0	10	S005	S006	1	0	14	64	1
S058	Female	1	16	24	17	24	17	1	3	S007	S008	1	0	20.5	64	0
S058	Female	2	27	23	18	23	29	0	7	S007	S008	1	0	23.25	64	1
S058	Female	4	43	28	12	28	12	0	5	S007	S008	1	0	20	64	1
S058	Female	5	27	32	10	32	37	0	10	S007	S008	1	0	27.75	64	1
S058	Female	6	20	30	16	30	41	0	6	S007	S008	1	0	29.25	64	1
S058	Female	1	20	18	17	18	17	0	10	S009	S010	1	0	17.5	64	1
S058	Female	4	26	30	13	30	31	0	10	S009	S010	1	0	26	64	1
S058	Female	6	13	15	11	15	11	0	10	S009	S010	1	0	13	64	1
S058	Female	1	14	63	32	15	11	0	9	S011	S012	1	0	30.25	64	1
S058	Female	2	16	41	21	41	21	0	7	S011	S012	1	0	31	64	1
S058	Female	3	31	35	31	35	31	0	9	S011	S012	1	0	33	64	1
S058	Female	6	11	21	30	21	30	0	6	S011	S012	1	0	25.5	64	1
S058	Female	2	27	15	20	15	20	0	5	S013	S014	1	0	17.5	64	1
S058	Female	3	9	11	18	11	18	0	10	S013	S014	1	0	14.5	64	1
S058	Female	4	15	10	13	10	13	0	9	S013	S014	1	0	11.5	64	1
S058	Female	6	20	8	10	8	10	1	6	S013	S014	1	0	9	64	0
S058	Female	1	31	25	22	25	22	0	4	S015	S016	1	0	23.5	64	1
S058	Female	2	32	33	30	33	30	0	4	S015	S016	1	0	31.5	64	1
S058	Female	3	37	34	33	34	33	0	5	S015	S016	1	0	33.5	64	1
S058	Female	4	26	33	48	33	48	0	8	S015	S016	1	0	40.5	64	1
S058	Female	5	20	30	31	30	31	1	8	S015	S016	1	0	30.5	64	0
S058	Female	6	30	56	62	56	62	0	4	S015	S016	1	0	59	64	1
S058	Female	1	9	17	37	17	37	1	8	S057	S058	0	1	27	64	1
S058	Female	2	13	16	16	16	16	1	10	S057	S058	0	1	16	64	1
S058	Female	3	18	7	16	7	28	1	7	S057	S058	0	1	14.5	64	1
S058	Female	4	12	8	11	8	11	1	10	S057	S058	0	1	9.5	64	1
S058	Female	5	18	14	11	14	11	1	6	S057	S058	0	1	12.5	64	1
S058	Female	6	10	9	17	9	17	1	9	S057	S058	0	1	13	64	1
S058	Female	1	19	14	15	14	15	0	9	S059	S060	1	0	14.5	64	1
S058	Female	2	21	21	17	21	17	1	7	S059	S060	1	0	19	64	0
S058	Female	3	24	25	20	25	20	1	5	S059	S060	1	0	22.5	64	0
S058	Female	4	28	21	27	21	27	1	4	S059	S060	1	0	24	64	0
S058	Female	5	35	32	34	32	34	0	3	S059	S060	1	0	33	64	1
S058	Male	6	20	18	17	18	17	0	6	S059	S060	1	0	17.5	64	1
S059	Male	1	19	26	24	26	24	0	7	S001	S002	1	0	25	63	1
S059	Male	2	34	54	18	54	44	0	7	S001	S002	1	0	42.5	63	1
S059	Male	3		16	13	16	13	0	8	S001	S002	1	0	14.5	63	1
S059	Male	4	50	17	17	17	17	0	8	S001	S002	1	0	17	63	1
S059	Male	3	24	16	15	16	15	0	9	S003	S004	1	0	15.5	63	1
S059	Male	4	14	24	31	24	31	0	8	S003	S004	1	0	27.5	63	1
S059	Male	5		27	13	27	13	0	7	S003	S004	1	0	20	63	1
S059	Male	2	10	18	12	18	12	1	9	S005	S006	1	0	15	63	0
S059	Male	5	25	15	13	15	13	0	9	S005	S006	1	0	14	63	1
S059	Male	6	15	17	11	17	11	1	9	S005	S006	1	0	14	63	0
S059	Male	2		23	18	23	29	0	8	S007	S008	1	0	23.25	63	1
S059	Male	3	48	20	8	20	34	0	5	S007	S008	1	0	20.5	63	1
S059	Male	4	50	28	12	28	12	0	8	S007	S008	1	0	20	63	1
S059	Male	5		32	10	32	37	0	9	S007	S008	1	0	27.75	63	1
S059	Male	4	34	30	13	30	31	0	6	S009	S010	1	0	26	63	1
S059	Male	5		19	15	9	15	1	5	S009	S010	1	0	14.5	63	0
S059	Male	6	20	15	11	15	11	1	9	S009	S010	1	0	13	63	0
S059	Male	2		41	21	41	21	0	9	S011	S012	1	0	31	63	1
S059	Male	4		45	20	45	51	0	8	S011	S012	1	0	40.25	63	1
S059	Male	1	27	12	12	12	12	0	7	S013	S014	1	0	12	63	1
S059	Male	2		15	20	15	20	0	5	S013	S014	1	0	17.5	63	1
S059	Male	5	15	15	23	15	23	0	9	S013	S014	1	0	19	63	1
S059	Male	6	33	8	10	8	10	1	9	S013	S014	1	0	9	63	0
S059	Male	1		25	22	25	22	0	4	S015	S016	1	0	23.5	63	1
S059	Male	2		33	30	33	30	0	8	S015	S016	1	0	31.5	63	1
S059	Male	3	29	34	33	34	33	1	7	S015	S016	1	0	33.5	63	0
S059	Male	4		33	48	33	48	0	10	S015	S016	1	0	40.5	63	1
S059	Male	5		30	31	30	31	1	4	S015	S016	1	0	30.5	63	0
S059	Male	6	50	56	62	56	62	1	7	S015	S016	1	0	59	63	0
S059	Male	1	13	17	37	17	37	0	5	S057	S058	1	0	27	63	1
S059	Male	2	20	16	16	16	16	0	8	S057	S058	1	0	16	63	1
S059	Male	3	26	7	16	7	28	1	9	S057	S058	1	0	14.5	63	0
S059	Male	4	6	8	11	8	11	1	9	S057	S058	1	0	9.5	63	0
S059	Male	5	25	14	11	14	11	1	8	S057	S058	1	0	12.5	63	0
S059	Male	6	47	9	17	9	17	1	9	S057	S058	1	0	13	63	0
S059	Male	6	55	9	17	9	17	1	4	S057	S058	1	0	13	63	0
S059	Male	1		14	15	14	15	1	7	S059	S060	0	1	14.5	63	1
S059	Male	2	24	21	17	21	17	1	6	S059	S060	0	1	19	63	1
S059	Male	3		25	20	25	20	0	8	S059	S060	0	1	22.5	63	0
S059	Male	4	27	21	27	21	27	1	9	S059	S060	0	1	24	63	1
S059	Male	5		32	34	32	34	0	8	S059	S060	0	1	33	63	0
S059	Female	6	28	18	17	18	17	1	9	S059	S060	0	1	17.5	63	1
S060	Female	4	20	17	17	17	17	0	8	S001	S002	1	0	17	63	1
S060	Female	5	15	11	12	11	12	1	6	S001	S002	1	0	11.5	63	0
S060	Female	6	9	8	11	8	11	1	8	S001	S002	1	0	9.5	63	0
S060	Female	1	24	26	14	26	14	0	7	S003	S004	1	0	20	63	1
S060	Female	4	7	24	31	24	31	0	8	S003	S004	1	0	27.5	63	1
S060	Female	5	46	27	13	27	13	0	7	S003	S004	1	0	20	63	1
S060	Female	6	7	17	18	17	18	0	6	S003	S004	1	0	17.5	63	1
S060	Female	2	13	18	12	18	12	1	8	S005	S006	1	0	15	63	0
S060	Female	3	11	43	13	43	13	0	7	S005	S006	1	0	28	63	1
S060	Female	6	19	17	11	17	11	1	8	S005	S006	1	0	14	63	0
S060	Female	1	12	24	17	24	17	1	8	S007	S008	1	0	20.5	63	0
S060	Female	2	31	23	18	23	29	1	7	S007	S008	1	0	23.25	63	0
S060	Female	3	10	20	8	20	34	1	8	S007	S008	1	0	20.5	63	0
S060	Female	5	48	32	10	32	37	1	7	S007	S008	1	0	27.75	63	0
S060	Female	4	11	30	13	30	31	1	8	S009	S010	1	0	26	63	0
S060	Female	5	45	19	15	9	15	1	7	S009	S010	1	0	14.5	63	0
S060	Female	2	18	41	21	41	21	1	8	S011	S012	1	0	31	63	0
S060	Female	4	18	45	20	45	51	1	8	S011	S012	1	0	40.25	63	0
S060	Female	6	14	21	30	21	30	0	9	S011	S012	1	0	25.5	63	1
S060	Female	2	33	15	20	15	20	0	6	S013	S014	1	0	17.5	63	1
S060	Female	3	13	11	18	11	18	0	8	S013	S014	1	0	14.5	63	1
S060	Female	4	49	10	13	10	13	0	8	S013	S014	1	0	11.5	63	1
S060	Female	6	25	8	10	8	10	0	8	S013	S014	1	0	9	63	1
S060	Female	1	26	25	22	25	22	0	8	S015	S016	1	0	23.5	63	1
S060	Female	2	52	33	30	33	30	0	8	S015	S016	1	0	31.5	63	1
S060	Female	3	13	34	33	34	33	0	7	S015	S016	1	0	33.5	63	1
S060	Female	4	14	33	48	33	48	0	8	S015	S016	1	0	40.5	63	1
S060	Female	5	30	30	31	30	31	0	7	S015	S016	1	0	30.5	63	1
S060	Female	6	32	56	62	56	62	0	8	S015	S016	1	0	59	63	1
S060	Female	1	52	17	37	17	37	0	8	S057	S058	1	0	27	63	1
S060	Female	2	53	16	16	16	16	0	8	S057	S058	1	0	16	63	1
S060	Female	3	15	7	16	7	28	0	7	S057	S058	1	0	14.5	63	1
S060	Female	4	10	8	11	8	11	0	5	S057	S058	1	0	9.5	63	1
S060	Female	4	26	8	11	8	11	0	7	S057	S058	1	0	9.5	63	1
S060	Female	5	8	14	11	14	11	0	7	S057	S058	1	0	12.5	63	1
S060	Female	6	14	9	17	9	17	0	7	S057	S058	1	0	13	63	1
S060	Female	1	30	14	15	14	15	0	8	S059	S060	0	1	14.5	63	0
S060	Female	2	21	21	17	21	17	0	7	S059	S060	0	1	19	63	0
S060	Female	3	24	25	20	25	20	0	7	S059	S060	0	1	22.5	63	0
S060	Female	4	27	21	27	21	27	0	8	S059	S060	0	1	24	63	0
S060	Female	5	20	32	34	32	34	0	7	S059	S060	0	1	33	63	0
S060	Female	6	19	18	17	18	17	0	7	S059	S060	0	1	17.5	63	0
